# Supplementary material for: Plastid Phylogenomic Insights into the Inter-Tribal Relationships of Plantaginaceae
Source: MDPI journal article supplement (doi:10.3390/biology12020263), 2023-02-07
Supplement: s1 [file s1]

Table S2 Plastomes included in phylogenetic analyses from GenBank

| Tribes        | Species                                                             | GenBank Accession |
|---------------|---------------------------------------------------------------------|-------------------|
| Angelonieae   | <i>Angelonia angustifolia</i>                                       | OM362910          |
| Antirrhineae  | <i>Antirrhinum majus</i>                                            | MW877560          |
| Callitricheae | <i>Callitriche palustris</i>                                        | MW774642          |
|               | <i>Hippuris vulgaris</i>                                            | MW044609          |
|               | <i>Penstemon cyaneus</i>                                            | MK391143          |
| Cheloneae     | <i>Penstemon fruticosus</i>                                         | MK947104          |
|               | <i>Penstemon personatus</i>                                         | MK940755          |
|               | <i>Penstemon rostriflorus</i>                                       | MK940756          |
| Digitalideae  | <i>Digitalis lanata</i>                                             | KY085895          |
|               | Gratioleae <i>Bacopa monnieri</i>                                   | MN736955          |
|               | <i>Limnophila sessiliflora</i>                                      | NC_063679         |
| Hemiphragmeae | <i>Scoparia dulcis</i>                                              | MZ242235          |
|               | <i>Hemiphragma heterophyllum</i>                                    | MN383192          |
|               | <i>Littorella uniflora</i>                                          | MW877563          |
|               | <i>Plantago lagopus</i>                                             | MW877581          |
|               | <i>Aragoa cleefii</i>                                               | MW877562          |
|               | <i>Aragoa abietina</i>                                              | MW877561          |
|               | <i>Plantago nubicola</i>                                            | MW877564          |
| Plantagineae  | <i>Plantago maritima</i>                                            | KR297244          |
|               | <i>Plantago aristata</i>                                            | MW877578          |
|               | <i>Plantago media</i>                                               | KR297245          |
|               | <i>Plantago depressa</i>                                            | MK144833          |
|               | <i>Plantago fengdouensis</i>                                        | MN418388          |
|               | <i>Plantago asiatica</i>                                            | MZ779005          |
|               | <i>Veronica polita</i>                                              | OL621900          |
|               | <i>Veronica persica</i>                                             | KT724052          |
|               | <i>Veronica eriogyne</i>                                            | MZ323109          |
|               | <i>Veronica undulata</i>                                            | MW783683          |
|               | <i>Veronica ovata</i> subsp. <i>kiusiana</i>                        | MT671999          |
|               | <i>Veronica nakaiana</i>                                            | KT633216          |
| Veroniceae    | <i>Picrorhiza</i> ( <i>Neopicrorhiza</i> ) <i>scrophulariiflora</i> | MK986819          |
|               | <i>Veronicastrum axillare</i>                                       | MW244757          |
|               | <i>Veronicastrum sibiricum</i>                                      | KT724053          |
|               | <i>Lagotis brevituba</i>                                            | MW182582          |
|               | <i>Lagotis yunnanensis</i>                                          | MN752238          |
|               | <i>Scrophularia dentata</i>                                         | MF861202          |
|               | <i>Buddleja sessilifolia</i>                                        | MH411151          |
