# Supplementary material for: Plastid Phylogenomic Insights into the Inter-Tribal Relationships of Plantaginaceae
Source: MDPI journal article supplement (doi:10.3390/biology12020263), 2023-02-07
Supplement: s1 [file s1]

**Table S5 Dataset partition with best-fitting model of molecular evolution (Partition Finder)  
for BI analyses.**

| Partition | Best Model | Genes                                                                                                              |
|-----------|------------|--------------------------------------------------------------------------------------------------------------------|
| 1         | GTR+I+G    | <i>rpoC1</i> (1st pos), <i>rps4</i> (1st pos)                                                                      |
| 2         | GTR+I+G    | <i>rpl36</i> (1st pos), <i>rpoC1</i> (2nd pos), <i>rps14</i> (2nd pos)                                             |
| 3         | GTR+G      | <i>psbI</i> (3rd pos), <i>rpoC1</i> (3rd pos)                                                                      |
| 4         | GTR+G      | <i>ycf1</i> (1st pos)                                                                                              |
| 5         | GTR+G      | <i>ycf1</i> (2nd pos)                                                                                              |
| 6         | GTR+G      | <i>ycf1</i> (3rd pos)                                                                                              |
| 7         | GTR+I+G    | <i>rpl2</i> (1st pos)                                                                                              |
| 8         | GTR+I+G    | <i>rpl2</i> (2nd pos), <i>rps12</i> (1st pos)                                                                      |
| 9         | GTR+G      | <i>petL</i> (1st pos), <i>rpl2</i> (3rd pos), <i>rps18</i> (2nd pos)                                               |
| 10        | GTR+I+G    | <i>rpoC2</i> (1st pos)                                                                                             |
| 11        | GTR+I+G    | <i>rpoC2</i> (2nd pos)                                                                                             |
| 12        | GTR+G      | <i>rpoC2</i> (3rd pos)                                                                                             |
| 13        | GTR+G      | <i>rps2</i> (1st pos), <i>rps4</i> (2nd pos), <i>rpl23</i> (2nd pos)                                               |
| 14        | GTR+I+G    | <i>rps2</i> (2nd pos)                                                                                              |
| 15        | GTR+G      | <i>rpoB</i> (3rd pos), <i>atpF</i> (3rd pos), <i>rps2</i> (3rd pos), <i>atpE</i> (3rd pos), <i>rps16</i> (3rd pos) |
| 16        | GTR+G      | <i>ycf2</i> (1st pos)                                                                                              |
| 17        | GTR+G      | <i>ycf2</i> (2nd pos)                                                                                              |
| 18        | GTR+G      | <i>ycf2</i> (3rd pos)                                                                                              |
| 19        | GTR+G      | <i>petN</i> (3rd pos), <i>rpl32</i> (1st pos), <i>rps3</i> (1st pos), <i>rpl33</i> (2nd pos)                       |
| 20        | GTR+I+G    | <i>rps3</i> (2nd pos), <i>psbK</i> (1st pos), <i>rps16</i> (2nd pos)                                               |
| 21        | GTR+G      | <i>rps3</i> (3rd pos)                                                                                              |
| 22        | GTR+I+G    | <i>petD</i> (1st pos), <i>ycf3</i> (1st pos), <i>petG</i> (1st pos), <i>psbI</i> (1st pos)                         |
| 23        | GTR+I+G    | <i>ycf3</i> (2nd pos)                                                                                              |
| 24        | GTR+G      | <i>psbK</i> (3rd pos), <i>ycf3</i> (3rd pos)                                                                       |
| 25        | GTR+G      | <i>rps4</i> (3rd pos), <i>psaJ</i> (3rd pos)                                                                       |
| 26        | GTR+G      | <i>ycf4</i> (1st pos)                                                                                              |
| 27        | GTR+G      | <i>ycf4</i> (2nd pos)                                                                                              |
| 28        | GTR+G      | <i>ycf4</i> (3rd pos)                                                                                              |
| 29        | GTR+G      | <i>rps7</i> (1st pos), <i>atpH</i> (1st pos)                                                                       |
| 30        | GTR+I+G    | <i>petN</i> (2nd pos), <i>rps7</i> (2nd pos), <i>psbB</i> (2nd pos), <i>rps12</i> (2nd pos)                        |
| 31        | GTR+G      | <i>rps7</i> (3rd pos)                                                                                              |
| 32        | GTR+G      | <i>rps8</i> (1st pos)                                                                                              |
| 33        | GTR+G      | <i>rps8</i> (2nd pos)                                                                                              |
| 34        | GTR+G      | <i>rps8</i> (3rd pos)                                                                                              |
| 35        | GTR+I+G    | <i>rpl14</i> (1st pos), <i>rps11</i> (1st pos)                                                                     |
| 36        | GTR+G      | <i>rps11</i> (2nd pos)                                                                                             |
| 37        | GTR+G      | <i>rps11</i> (3rd pos)                                                                                             |
| 38        | GTR+G      | <i>psbJ</i> (3rd pos), <i>rps12</i> (3rd pos)                                                                      |
| 39        | GTR+I+G    | <i>rpl14</i> (2nd pos)                                                                                             |
| 40        | GTR+G      | <i>rpl14</i> (3rd pos)                                                                                             |

| Partition | Best Model | Genes                                                                                                                                     |
|-----------|------------|-------------------------------------------------------------------------------------------------------------------------------------------|
| 41        | GTR+G      | <i>rps14</i> (1st pos)                                                                                                                    |
| 42        | GTR+G      | <i>rps14</i> (3rd pos)                                                                                                                    |
| 43        | GTR+G      | <i>rps15</i> (1st pos)                                                                                                                    |
| 44        | GTR+G      | <i>rps15</i> (2nd pos)                                                                                                                    |
| 45        | GTR+G      | <i>rpl32</i> (3rd pos), <i>rps15</i> (3rd pos)                                                                                            |
| 46        | GTR+I+G    | <i>rpl16</i> (1st pos)                                                                                                                    |
| 47        | GTR+I+G    | <i>psaC</i> (1st pos), <i>psbZ</i> (1st pos), <i>rpl16</i> (2nd pos), <i>psaJ</i> (1st pos), <i>atpI</i> (1st pos)                        |
| 48        | GTR+I+G    | <i>rpl16</i> (3rd pos)                                                                                                                    |
| 49        | GTR+G      | <i>rps16</i> (1st pos)                                                                                                                    |
| 50        | GTR+G      | <i>rps18</i> (1st pos)                                                                                                                    |
| 51        | GTR+G      | <i>rps18</i> (3rd pos)                                                                                                                    |
| 52        | GTR+G      | <i>rps19</i> (1st pos)                                                                                                                    |
| 53        | GTR+I+G    | <i>rps19</i> (2nd pos), <i>psbH</i> (2nd pos)                                                                                             |
| 54        | GTR+I+G    | <i>rps19</i> (3rd pos)                                                                                                                    |
| 55        | GTR+G      | <i>rpl20</i> (1st pos), <i>rpoA</i> (2nd pos)                                                                                             |
| 56        | GTR+I+G    | <i>rpl20</i> (2nd pos), <i>psbH</i> (1st pos), <i>psbF</i> (1st pos), <i>cemA</i> (1st pos)                                               |
| 57        | GTR+G      | <i>rpl20</i> (3rd pos)                                                                                                                    |
| 58        | GTR+G      | <i>rpl22</i> (1st pos)                                                                                                                    |
| 59        | GTR+G      | <i>rpl22</i> (2nd pos)                                                                                                                    |
| 60        | GTR+G      | <i>rpl22</i> (3rd pos)                                                                                                                    |
| 61        | GTR+G      | <i>rpl23</i> (1st pos)                                                                                                                    |
| 62        | GTR        | <i>rpl23</i> (3rd pos)                                                                                                                    |
| 63        | GTR+I+G    | <i>rpl32</i> (2nd pos)                                                                                                                    |
| 64        | GTR        | <i>rpl33</i> (1st pos)                                                                                                                    |
| 65        | GTR+G      | <i>rpoA</i> (3rd pos), <i>rpl33</i> (3rd pos)                                                                                             |
| 66        | GTR+I+G    | <i>psaB</i> (2nd pos), <i>psaA</i> (2nd pos), <i>psbC</i> (2nd pos), <i>psbD</i> (2nd pos), <i>rpl36</i> (2nd pos), <i>psbN</i> (2nd pos) |
| 67        | GTR+I+G    | <i>rpl36</i> (3rd pos), <i>ndhE</i> (3rd pos)                                                                                             |
| 68        | GTR+I+G    | <i>accD</i> (1st pos)                                                                                                                     |
| 69        | GTR+I+G    | <i>accD</i> (2nd pos)                                                                                                                     |
| 70        | GTR+G      | <i>accD</i> (3rd pos)                                                                                                                     |
| 71        | GTR+I+G    | <i>atpA</i> (1st pos)                                                                                                                     |
| 72        | GTR+I+G    | <i>atpA</i> (2nd pos)                                                                                                                     |
| 73        | GTR+G      | <i>petA</i> (3rd pos), <i>atpA</i> (3rd pos)                                                                                              |
| 74        | GTR+I+G    | <i>atpB</i> (1st pos), <i>petA</i> (1st pos)                                                                                              |
| 75        | GTR+I+G    | <i>atpB</i> (2nd pos), <i>petL</i> (2nd pos)                                                                                              |
| 76        | GTR+G      | <i>petB</i> (3rd pos), <i>atpB</i> (3rd pos)                                                                                              |
| 77        | GTR+G      | <i>atpE</i> (1st pos)                                                                                                                     |
| 78        | GTR+I+G    | <i>cemA</i> (2nd pos), <i>atpE</i> (2nd pos)                                                                                              |
| 79        | GTR+G      | <i>atpF</i> (1st pos)                                                                                                                     |
| 80        | GTR+I+G    | <i>atpF</i> (2nd pos)                                                                                                                     |
| 81        | GTR+I+G    | <i>psbJ</i> (2nd pos), <i>psbF</i> (2nd pos), <i>atpH</i> (2nd pos)                                                                       |

| Partition | Best Model | Genes                                                                                                             |
|-----------|------------|-------------------------------------------------------------------------------------------------------------------|
| 82        | GTR+G      | <i>psbD</i> (3rd pos), <i>atpH</i> (3rd pos)                                                                      |
| 83        | GTR+I+G    | <i>atpI</i> (2nd pos)                                                                                             |
| 84        | GTR+G      | <i>petD</i> (3rd pos), <i>atpI</i> (3rd pos)                                                                      |
| 85        | GTR+I+G    | <i>ccsA</i> (1st pos)                                                                                             |
| 86        | GTR+I+G    | <i>ccsA</i> (2nd pos)                                                                                             |
| 87        | GTR+I+G    | <i>ccsA</i> (3rd pos)                                                                                             |
| 88        | GTR+G      | <i>cemA</i> (3rd pos)                                                                                             |
| 89        | GTR        | <i>clpP</i> (1st pos)                                                                                             |
| 90        | GTR+G      | <i>clpP</i> (2nd pos)                                                                                             |
| 91        | GTR+G      | <i>clpP</i> (3rd pos)                                                                                             |
| 92        | GTR+G      | <i>psbM</i> (3rd pos), <i>matK</i> (1st pos)                                                                      |
| 93        | GTR+G      | <i>matK</i> (2nd pos)                                                                                             |
| 94        | GTR+G      | <i>matK</i> (3rd pos)                                                                                             |
| 95        | GTR+I+G    | <i>ndhE</i> (1st pos)                                                                                             |
| 96        | GTR+G      | <i>ndhE</i> (2nd pos), <i>psbK</i> (2nd pos)                                                                      |
| 97        | GTR+G      | <i>petA</i> (2nd pos)                                                                                             |
| 98        | GTR+I+G    | <i>psaA</i> (1st pos), <i>petB</i> (1st pos)                                                                      |
| 99        | GTR+I+G    | <i>petB</i> (2nd pos)                                                                                             |
| 100       | GTR+I+G    | <i>petD</i> (2nd pos)                                                                                             |
| 101       | GTR+I+G    | <i>psbL</i> (2nd pos), <i>petG</i> (2nd pos)                                                                      |
| 102       | GTR        | <i>petG</i> (3rd pos)                                                                                             |
| 103       | GTR+G      | <i>petL</i> (3rd pos)                                                                                             |
| 104       | GTR+I+G    | <i>petN</i> (1st pos), <i>psbE</i> (2nd pos), <i>psbA</i> (2nd pos), <i>psbL</i> (1st pos), <i>psbI</i> (2nd pos) |
| 105       | GTR+I+G    | <i>psaA</i> (3rd pos), <i>psbC</i> (3rd pos)                                                                      |
| 106       | GTR+I+G    | <i>psbD</i> (1st pos), <i>psaB</i> (1st pos)                                                                      |
| 107       | GTR+I+G    | <i>psaB</i> (3rd pos)                                                                                             |
| 108       | GTR+I+G    | <i>psaC</i> (2nd pos)                                                                                             |
| 109       | GTR+G      | <i>psaC</i> (3rd pos)                                                                                             |
| 110       | GTR+G      | <i>psaI</i> (1st pos)                                                                                             |
| 111       | GTR        | <i>psaI</i> (2nd pos)                                                                                             |
| 112       | GTR        | <i>psaI</i> (3rd pos)                                                                                             |
| 113       | GTR+G      | <i>psaJ</i> (2nd pos)                                                                                             |
| 114       | GTR+I+G    | <i>psbA</i> (1st pos)                                                                                             |
| 115       | GTR+I+G    | <i>psbA</i> (3rd pos)                                                                                             |
| 116       | GTR+I+G    | <i>psbN</i> (1st pos), <i>psbB</i> (1st pos)                                                                      |
| 117       | GTR+G      | <i>psbB</i> (3rd pos)                                                                                             |
| 118       | GTR+I+G    | <i>psbC</i> (1st pos)                                                                                             |
| 119       | GTR+I+G    | <i>psbE</i> (1st pos)                                                                                             |
| 120       | GTR+G      | <i>psbE</i> (3rd pos)                                                                                             |
| 121       | GTR+I+G    | <i>psbF</i> (3rd pos)                                                                                             |
| 122       | GTR+G      | <i>psbH</i> (3rd pos)                                                                                             |
| 123       | GTR+I+G    | <i>psbJ</i> (1st pos)                                                                                             |

| Partition | Best Model | Genes                 |
|-----------|------------|-----------------------|
| 124       | GTR        | <i>psbL</i> (3rd pos) |
| 125       | GTR+G      | <i>psbM</i> (1st pos) |
| 126       | GTR+G      | <i>psbM</i> (2nd pos) |
| 127       | GTR+G      | <i>psbN</i> (3rd pos) |
| 128       | GTR+I+G    | <i>psbT</i> (1st pos) |
| 129       | GTR+I+G    | <i>psbT</i> (2nd pos) |
| 130       | GTR+G      | <i>psbT</i> (3rd pos) |
| 131       | GTR+I+G    | <i>psbZ</i> (2nd pos) |
| 132       | GTR+I+G    | <i>psbZ</i> (3rd pos) |
| 133       | GTR+I+G    | <i>rbcL</i> (1st pos) |
| 134       | GTR+I+G    | <i>rbcL</i> (2nd pos) |
| 135       | GTR+G      | <i>rbcL</i> (3rd pos) |
| 136       | GTR+I+G    | <i>rpoA</i> (1st pos) |
| 137       | GTR+I+G    | <i>rpoB</i> (1st pos) |
| 138       | GTR+I+G    | <i>rpoB</i> (2nd pos) |
