# Supplementary material for: Plastid Phylogenomic Insights into the Inter-Tribal Relationships of Plantaginaceae
Source: MDPI journal article supplement (doi:10.3390/biology12020263), 2023-02-07
Supplement: s1 [file s1]

**Table S3 Characteristics of alignments of 68 protein-coding genes involved in the phylogenetic analyses.**

| <b>Gene</b> | <b>Aligned length<br/>(bp)</b> | <b>No. of variable sites<br/>(divergence, %)</b> | <b>No. of parsimony informative sites<br/>(divergence, %)</b> |
|-------------|--------------------------------|--------------------------------------------------|---------------------------------------------------------------|
| <i>accD</i> | 1,518                          | 1,004 (54.51)                                    | 769 (41.75)                                                   |
| <i>atpA</i> | 1,500                          | 361 (23.69)                                      | 254 (16.67)                                                   |
| <i>atpB</i> | 402                            | 352 (23.37)                                      | 248 (16.47)                                                   |
| <i>atpE</i> | 576                            | 106 (26.57)                                      | 62 (15.54)                                                    |
| <i>atpF</i> | 246                            | 153 (27.57)                                      | 97 (17.48)                                                    |
| <i>atpH</i> | 744                            | 43 (17.48)                                       | 26 (10.57)                                                    |
| <i>atpI</i> | 1,694                          | 167 (22.63)                                      | 104 (14.09)                                                   |
| <i>ccsA</i> | 1,104                          | 405 (41.67)                                      | 268 (27.59)                                                   |
| <i>cemA</i> | 1,512                          | 232 (33.33)                                      | 150 (21.55)                                                   |
| <i>clpP</i> | 363                            | 409 (59.53)                                      | 284 (41.34)                                                   |
| <i>matK</i> | 1,381                          | 793 (49.04)                                      | 548 (33.89)                                                   |
| <i>ndhE</i> | 306                            | 80 (26.85)                                       | 37 (12.42)                                                    |
| <i>petA</i> | 2,276                          | 269 (27.93)                                      | 177 (18.38)                                                   |
| <i>petB</i> | 1,185                          | 120 (18.52)                                      | 81 (12.50)                                                    |
| <i>petD</i> | 516                            | 84 (17.39)                                       | 55 (11.39)                                                    |
| <i>petG</i> | 477                            | 21 (18.42)                                       | 12 (10.53)                                                    |
| <i>petL</i> | 664                            | 23 (23.95)                                       | 9 (9.38)                                                      |
| <i>petN</i> | 972                            | 11 (12.22)                                       | 6 (6.67)                                                      |
| <i>psaA</i> | 648                            | 407 (18.06)                                      | 254 (11.27)                                                   |
| <i>psaB</i> | 474                            | 391 (17.73)                                      | 278 (12.61)                                                   |
| <i>psaC</i> | 114                            | 59 (23.98)                                       | 38 (15.45)                                                    |
| <i>psaI</i> | 96                             | 29 (26.13)                                       | 14 (12.61)                                                    |
| <i>psaJ</i> | 90                             | 33 (25.58)                                       | 24 (18.60)                                                    |
| <i>psbA</i> | 2,254                          | 148 (13.98)                                      | 92 (8.69)                                                     |
| <i>psbB</i> | 2,205                          | 364 (23.98)                                      | 254 (16.73)                                                   |
| <i>psbC</i> | 246                            | 255 (17.93)                                      | 172 (12.10)                                                   |
| <i>psbD</i> | 111                            | 178 (16.76)                                      | 123 (11.58)                                                   |
| <i>psbE</i> | 126                            | 33 (13.10)                                       | 21 (8.33)                                                     |
| <i>psbF</i> | 1,062                          | 14 (11.67)                                       | 9 (7.50)                                                      |
| <i>psbH</i> | 1,527                          | 67 (29.78)                                       | 45 (20.00)                                                    |
| <i>psbI</i> | 1,503                          | 23 (20.72)                                       | 13 (11.71)                                                    |
| <i>psbJ</i> | 1,062                          | 15 (12.20)                                       | 7 (5.69)                                                      |
| <i>psbK</i> | 252                            | 48 (25.40)                                       | 30 (15.87)                                                    |
| <i>psbL</i> | 120                            | 13 (11.11)                                       | 7 (5.98)                                                      |
| <i>psbM</i> | 231                            | 24 (22.86)                                       | 16 (15.24)                                                    |
| <i>psbN</i> | 111                            | 22 (16.67)                                       | 15 (11.36)                                                    |
| <i>psbT</i> | 123                            | 23 (22.55)                                       | 17 (16.67)                                                    |
| <i>psbZ</i> | 204                            | 36 (19.05)                                       | 23 (12.17)                                                    |

| <b>Gene</b>  | <b>Aligned length<br/>(bp)</b> | <b>No. of variable sites<br/>(divergence, %)</b> | <b>No. of parsimony informative sites<br/>(divergence, %)</b> |
|--------------|--------------------------------|--------------------------------------------------|---------------------------------------------------------------|
| <i>rbcL</i>  | 117                            | 314 (21.90)                                      | 215 (14.99)                                                   |
| <i>rpl2</i>  | 105                            | 88 (10.55)                                       | 45 (5.40)                                                     |
| <i>rpl14</i> | 132                            | 103 (27.91)                                      | 62 (16.80)                                                    |
| <i>rpl16</i> | 102                            | 107 (25.48)                                      | 67 (15.95)                                                    |
| <i>rpl20</i> | 189                            | 119 (33.62)                                      | 76 (21.47)                                                    |
| <i>rpl22</i> | 1437                           | 157 (43.98)                                      | 104 (29.13)                                                   |
| <i>rpl23</i> | 828                            | 25 (8.68)                                        | 12 (4.17)                                                     |
| <i>rpl32</i> | 369                            | 56 (35.22)                                       | 40 (25.16)                                                    |
| <i>rpl33</i> | 366                            | 79 (37.62)                                       | 46 (21.90)                                                    |
| <i>rpl36</i> | 368                            | 24 (21.05)                                       | 15 (13.16)                                                    |
| <i>rpoA</i>  | 386                            | 296 (35.75)                                      | 194 (23.43)                                                   |
| <i>rpoB</i>  | 210                            | 825 (25.65)                                      | 485 (15.08)                                                   |
| <i>rpoC1</i> | 114                            | 560 (26.90)                                      | 306 (14.70)                                                   |
| <i>rpoC2</i> | 936                            | 1517 (35.20)                                     | 938 (21.76)                                                   |
| <i>rps2</i>  | 3,246                          | 192 (26.12)                                      | 122 (16.60)                                                   |
| <i>rps3</i>  | 1,380                          | 256 (37.93)                                      | 162 (24.00)                                                   |
| <i>rps4</i>  | 4,229                          | 178 (28.25)                                      | 107 (16.98)                                                   |
| <i>rps7</i>  | 699                            | 54 (11.54)                                       | 31 (6.62)                                                     |
| <i>rps8</i>  | 609                            | 148 (36.54)                                      | 88 (21.73)                                                    |
| <i>rps11</i> | 468                            | 155 (37.17)                                      | 102 (24.46)                                                   |
| <i>rps12</i> | 417                            | 37 (9.20)                                        | 20 (4.98)                                                     |
| <i>rps14</i> | 435                            | 97 (32.01)                                       | 59 (19.47)                                                    |
| <i>rps15</i> | 383                            | 124 (45.42)                                      | 76 (27.84)                                                    |
| <i>rps16</i> | 305                            | 74 (28.03)                                       | 44 (16.67)                                                    |
| <i>rps18</i> | 279                            | 86 (24.71)                                       | 52 (14.94)                                                    |
| <i>rps19</i> | 372                            | 102 (36.56)                                      | 68 (24.37)                                                    |
| <i>ycf1</i>  | 7,953                          | 4984 (62.59)                                     | 3024 (37.98)                                                  |
| <i>ycf2</i>  | 8,358                          | 1517 (20.30)                                     | 758 (10.14)                                                   |
| <i>ycf3</i>  | 516                            | 87 (16.67)                                       | 46 (8.81)                                                     |
| <i>ycf4</i>  | 555                            | 219 (38.83)                                      | 122 (21.63)                                                   |
| Total        | 61,841                         | 19395 (31.36)                                    | 12125 (19.61)                                                 |
