# Supplementary material for: Plastid Phylogenomic Insights into the Inter-Tribal Relationships of Plantaginaceae
Source: MDPI journal article supplement (doi:10.3390/biology12020263), 2023-02-07
Supplement: s1 [file s1]

Table S6 Summary of Illumina sequencing for six species.

| Taxa                           | No. of clean reads | No. of mapped reads | Sequencing coverage (×) |
|--------------------------------|--------------------|---------------------|-------------------------|
| <i>Adenosma glutinosum</i>     | 20,494,582         | 1,364,265           | 1335.78                 |
| <i>Deinostema violacea</i>     | 30,472,610         | 302,408             | 295.979                 |
| <i>Ellisiophyllum pinnatum</i> | 30,408,958         | 465,066             | 457.779                 |
| <i>Linaria buriatica</i>       | 6,069,200          | 545,348             | 521.223                 |
| <i>Russelia equisetiformis</i> | 29,562,900         | 5,093,971           | 4997.812                |
| <i>Trapella sinensis</i>       | 11,246,098         | 548,202             | 499.113                 |
