# Supplementary material for: Plastid Phylogenomic Insights into the Inter-Tribal Relationships of Plantaginaceae
Source: MDPI journal article supplement (doi:10.3390/biology12020263), 2023-02-07
Supplement: s1 [file s1]

**Table S4 Dataset partition with best-fitting model of molecular evolution (Modelfinder) for ML analyses.**

| Partition | Best Model | Genes                                                                                                                                                                                                                                                                                                                                                                |
|-----------|------------|----------------------------------------------------------------------------------------------------------------------------------------------------------------------------------------------------------------------------------------------------------------------------------------------------------------------------------------------------------------------|
| 1         | F81+F      | <i>rpl23</i> (3rd pos), <i>ndhE</i> (2nd pos), <i>psaI</i> (2nd pos)                                                                                                                                                                                                                                                                                                 |
| 2         | F81+F+G4   | <i>rps11</i> (1st pos), <i>atpE</i> (1st pos), <i>atpF</i> (1st pos)                                                                                                                                                                                                                                                                                                 |
| 3         | F81+F+I    | <i>rps7</i> (1st pos), <i>rpl23</i> (1st pos), <i>psbD</i> (2nd pos)                                                                                                                                                                                                                                                                                                 |
| 4         | GTR+F      | <i>rps4</i> (3rd pos)                                                                                                                                                                                                                                                                                                                                                |
| 5         | GTR+F+G4   | <i>ycf1</i> (3rd pos), <i>rps14</i> (3rd pos), <i>atpE</i> (3rd pos)                                                                                                                                                                                                                                                                                                 |
| 6         | GTR+F+I+R2 | <i>rpoC2</i> (3rd pos), <i>ccsA</i> (2nd pos), <i>rpoB</i> (3rd pos)                                                                                                                                                                                                                                                                                                 |
| 7         | HKY+F+G4   | <i>rps12</i> (3rd pos), <i>rpl20</i> (1st pos)                                                                                                                                                                                                                                                                                                                       |
| 8         | HKY+F+I    | <i>atpB</i> (2nd pos), <i>atpI</i> (2nd pos), <i>petD</i> (2nd pos), <i>psbL</i> (2nd pos),<br><i>psbZ</i> (2nd pos)                                                                                                                                                                                                                                                 |
| 9         | HKY+F+I+G4 | <i>rbcL</i> (1st pos)                                                                                                                                                                                                                                                                                                                                                |
| 10        | HKY+F+I+R2 | <i>psbA</i> (3rd pos)                                                                                                                                                                                                                                                                                                                                                |
| 11        | HKY+F+R2   | <i>rps16</i> (3rd pos), <i>atpA</i> (2nd pos), <i>petA</i> (1st pos), <i>psbA</i> (1st pos),<br><i>psbE</i> (3rd pos), <i>psbH</i> (1st pos)                                                                                                                                                                                                                         |
| 12        | JC         | <i>rpl2</i> (2nd pos), <i>rpl36</i> (1st pos), <i>rpl36</i> (2nd pos), <i>atpH</i> (2nd pos),<br><i>petG</i> (1st pos), <i>petN</i> (1st pos), <i>petN</i> (2nd pos), <i>psbE</i> (2nd pos),<br><i>psbF</i> (2nd pos), <i>psbI</i> (2nd pos), <i>psbJ</i> (2nd pos), <i>psbL</i> (1st pos),<br><i>psbN</i> (2nd pos)                                                 |
| 13        | JC+G4      | <i>rps11</i> (2nd pos), <i>rpl22</i> (2nd pos)                                                                                                                                                                                                                                                                                                                       |
| 14        | JC+I       | <i>rps7</i> (2nd pos), <i>rps12</i> (1st pos), <i>rpl16</i> (2nd pos), <i>clpP</i> (2nd pos),<br><i>psaB</i> (2nd pos), <i>psaC</i> (1st pos), <i>psaC</i> (2nd pos), <i>psaJ</i> (2nd pos),<br><i>psbN</i> (1st pos), <i>rbcL</i> (2nd pos)                                                                                                                         |
| 15        | K2P        | <i>petG</i> (3rd pos), <i>petL</i> (1st pos), <i>psaJ</i> (1st pos), <i>psbA</i> (2nd pos)                                                                                                                                                                                                                                                                           |
| 16        | K2P+G4     | <i>rps14</i> (2nd pos), <i>rps16</i> (1st pos)                                                                                                                                                                                                                                                                                                                       |
| 17        | K2P+I      | <i>rps2</i> (2nd pos), <i>ycf3</i> (2nd pos), <i>rps12</i> (2nd pos), <i>rps16</i> (2nd pos),<br><i>rps18</i> (2nd pos), <i>rpl23</i> (2nd pos), <i>atpE</i> (2nd pos), <i>atpI</i> (1st pos),<br><i>petD</i> (1st pos), <i>petG</i> (2nd pos), <i>psbB</i> (2nd pos), <i>psbE</i> (1st pos),<br><i>psbF</i> (1st pos), <i>psbK</i> (1st pos), <i>psbZ</i> (1st pos) |
| 18        | K2P+R2     | <i>rpl20</i> (2nd pos), <i>petB</i> (1st pos)                                                                                                                                                                                                                                                                                                                        |
| 19        | K3P        | <i>psbL</i> (3rd pos)                                                                                                                                                                                                                                                                                                                                                |
| 20        | K3P+G4     | <i>rpl32</i> (1st pos), <i>rpl33</i> (2nd pos), <i>rpl33</i> (3rd pos)                                                                                                                                                                                                                                                                                               |
| 21        | K3P+I      | <i>rps19</i> (1st pos), <i>psaA</i> (1st pos)                                                                                                                                                                                                                                                                                                                        |
| 22        | K3P+R2     | <i>psbC</i> (2nd pos)                                                                                                                                                                                                                                                                                                                                                |
| 23        | K3Pu+F     | <i>psaI</i> (3rd pos), <i>psbI</i> (3rd pos)                                                                                                                                                                                                                                                                                                                         |
| 24        | K3Pu+F+G4  | <i>rpl2</i> (3rd pos), <i>ycf3</i> (3rd pos), <i>rps4</i> (2nd pos), <i>ycf4</i> (2nd pos), <i>rps7</i><br>(3rd pos), <i>rpl16</i> (3rd pos), <i>rps18</i> (1st pos), <i>psbZ</i> (3rd pos)                                                                                                                                                                          |
| 25        | K3Pu+F+I   | <i>rpl2</i> (1st pos), <i>rps3</i> (1st pos), <i>accD</i> (2nd pos), <i>atpH</i> (1st pos),<br><i>psbD</i> (1st pos)                                                                                                                                                                                                                                                 |
| 26        | K3Pu+F+R2  | <i>atpA</i> (1st pos), <i>cemA</i> (1st pos), <i>psbB</i> (1st pos)                                                                                                                                                                                                                                                                                                  |
| 27        | TIM+F+G4   | <i>rps2</i> (1st pos), <i>petL</i> (3rd pos)                                                                                                                                                                                                                                                                                                                         |
| 28        | TIM+F+I    | <i>psbC</i> (1st pos)                                                                                                                                                                                                                                                                                                                                                |
| 29        | TIM2e+I    | <i>rps8</i> (2nd pos), <i>psbM</i> (1st pos)                                                                                                                                                                                                                                                                                                                         |

| Partition | Best Model     | Genes                                                                                                                                                                                                                                                                                                                                                                                        |
|-----------|----------------|----------------------------------------------------------------------------------------------------------------------------------------------------------------------------------------------------------------------------------------------------------------------------------------------------------------------------------------------------------------------------------------------|
| 30        | TIM3+F+G4      | <i>rpl32</i> (3rd pos)                                                                                                                                                                                                                                                                                                                                                                       |
| 31        | TIM3+F+I       | <i>psbM</i> (2nd pos)                                                                                                                                                                                                                                                                                                                                                                        |
| 32        | TIM3+F+R2      | <i>psaC</i> (3rd pos), <i>psbH</i> (3rd pos)                                                                                                                                                                                                                                                                                                                                                 |
| 33        | TIM3e+G4       | <i>psbH</i> (2nd pos)                                                                                                                                                                                                                                                                                                                                                                        |
| 34        | TIME+I         | <i>rpl14</i> (2nd pos)                                                                                                                                                                                                                                                                                                                                                                       |
| 35        | TN+F           | <i>petL</i> (2nd pos)                                                                                                                                                                                                                                                                                                                                                                        |
| 36        | TN+F+R2        | <i>rps19</i> (2nd pos)                                                                                                                                                                                                                                                                                                                                                                       |
| 37        | TNe            | <i>psbI</i> (1st pos)                                                                                                                                                                                                                                                                                                                                                                        |
| 38        | TNe+G4         | <i>rps15</i> (1st pos)                                                                                                                                                                                                                                                                                                                                                                       |
| 39        | TNe+R2         | <i>rpl32</i> (2nd pos), <i>psbJ</i> (1st pos)                                                                                                                                                                                                                                                                                                                                                |
| 40        | TPM2u+F        | <i>clpP</i> (1st pos)                                                                                                                                                                                                                                                                                                                                                                        |
| 41        | TPM2u+F+G4     | <i>rps18</i> (3rd pos), <i>cemA</i> (2nd pos), <i>rpoA</i> (2nd pos)                                                                                                                                                                                                                                                                                                                         |
| 42        | TPM2u+F+I      | <i>petB</i> (2nd pos)                                                                                                                                                                                                                                                                                                                                                                        |
| 43        | TPM2u+F+R2     | <i>rpl16</i> (1st pos)                                                                                                                                                                                                                                                                                                                                                                       |
| 44        | TPM3           | <i>ycf3</i> (1st pos), <i>psaJ</i> (3rd pos)                                                                                                                                                                                                                                                                                                                                                 |
| 45        | TPM3+G4        | <i>rps14</i> (1st pos), <i>petN</i> (3rd pos), <i>rpoA</i> (1st pos)                                                                                                                                                                                                                                                                                                                         |
| 46        | TPM3+I         | <i>rps4</i> (1st pos), <i>psaB</i> (1st pos), <i>psbN</i> (3rd pos), <i>psbT</i> (1st pos),<br><i>psbT</i> (2nd pos)                                                                                                                                                                                                                                                                         |
| 47        | TPM3+I+I+R2    | <i>ndhE</i> (1st pos)                                                                                                                                                                                                                                                                                                                                                                        |
| 48        | TPM3u+F        | <i>rpl33</i> (1st pos), <i>psbK</i> (3rd pos)                                                                                                                                                                                                                                                                                                                                                |
| 49        | TPM3u+F+G4     | <i>rpoC1</i> (2nd pos), <i>rps3</i> (2nd pos), <i>rps11</i> (3rd pos), <i>rps15</i> (2nd pos),<br><i>rps15</i> (3rd pos), <i>atpH</i> (3rd pos), <i>psbM</i> (3rd pos), <i>psbT</i> (3rd pos)                                                                                                                                                                                                |
| 50        | TPM3u+F+I      | <i>rpl20</i> (3rd pos), <i>rpl36</i> (3rd pos), <i>accD</i> (1st pos), <i>petA</i> (2nd pos),<br><i>psbJ</i> (3rd pos), <i>psbK</i> (2nd pos)                                                                                                                                                                                                                                                |
| 51        | TPM3u+F+I+I+R3 | <i>atpB</i> (1st pos)                                                                                                                                                                                                                                                                                                                                                                        |
| 52        | TPM3u+F+R2     | <i>rpl14</i> (1st pos), <i>psaA</i> (2nd pos), <i>rpoB</i> (1st pos), <i>rpoB</i> (2nd pos)<br><i>rpoC1</i> (3rd pos), <i>ycf1</i> (1st pos), <i>ycf1</i> (2nd pos), <i>rps2</i> (3rd pos),<br><i>rps3</i> (3rd pos), <i>rps8</i> (1st pos), <i>rps8</i> (3rd pos), <i>rpl14</i> (3rd pos),<br><i>rpl22</i> (1st pos), <i>rpl22</i> (3rd pos), <i>accD</i> (3rd pos), <i>atpB</i> (3rd pos), |
| 53        | TVM+F+G4       | <i>atpF</i> (3rd pos), <i>cemA</i> (3rd pos), <i>clpP</i> (3rd pos), <i>matK</i> (1st pos),<br><i>matK</i> (3rd pos), <i>ndhE</i> (3rd pos), <i>petA</i> (3rd pos), <i>petB</i> (3rd pos),<br><i>petD</i> (3rd pos), <i>psaA</i> (3rd pos), <i>psbB</i> (3rd pos), <i>psbD</i> (3rd pos),<br><i>rbcl</i> (3rd pos), <i>rpoA</i> (3rd pos)                                                    |
| 54        | TVM+F+I        | <i>rps19</i> (3rd pos), <i>ccsA</i> (1st pos)                                                                                                                                                                                                                                                                                                                                                |
| 55        | TVM+F+I+I+R2   | <i>rpoC2</i> (2nd pos), <i>atpA</i> (3rd pos), <i>atpF</i> (2nd pos), <i>atpI</i> (3rd pos),<br><i>ccsA</i> (3rd pos), <i>matK</i> (2nd pos), <i>psaB</i> (3rd pos)                                                                                                                                                                                                                          |
| 56        | TVM+F+R2       | <i>rpoC2</i> (1st pos), <i>ycf2</i> (1st pos), <i>ycf2</i> (2nd pos), <i>ycf2</i> (3rd pos), <i>ycf4</i><br>(3rd pos), <i>psbC</i> (3rd pos)                                                                                                                                                                                                                                                 |
| 57        | TVMe+G4        | <i>rpoC1</i> (1st pos), <i>ycf4</i> (1st pos), <i>psaI</i> (1st pos), <i>psbF</i> (3rd pos)                                                                                                                                                                                                                                                                                                  |
