# Supplementary material for: Plastid Phylogenomic Insights into the Inter-Tribal Relationships of Plantaginaceae
Source: MDPI journal article supplement (doi:10.3390/biology12020263), 2023-02-07
Supplement: s1 [file s1]

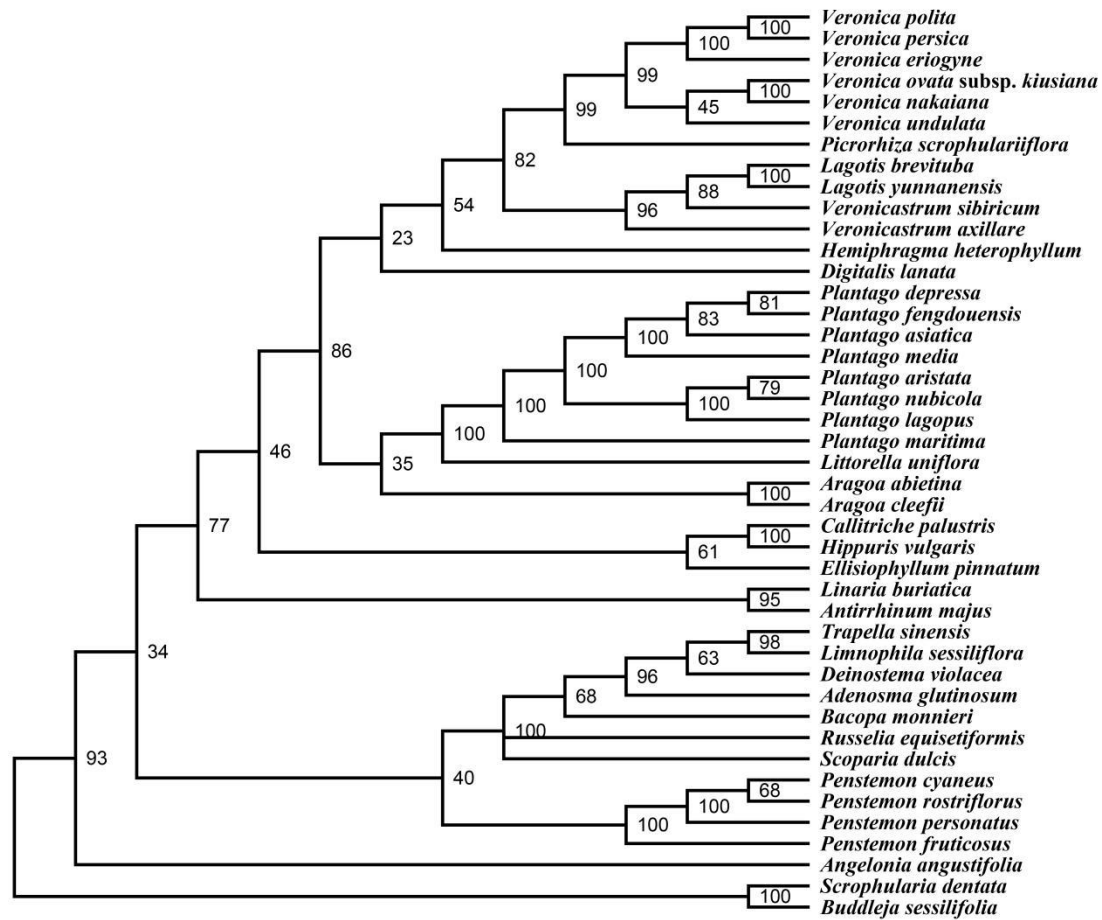

Maximum likelihood tree of Plantaginaceae based on *accD* gene. Values at nodes represent the bootstrap support values. Nodes <10% bootstrap support were collapsed

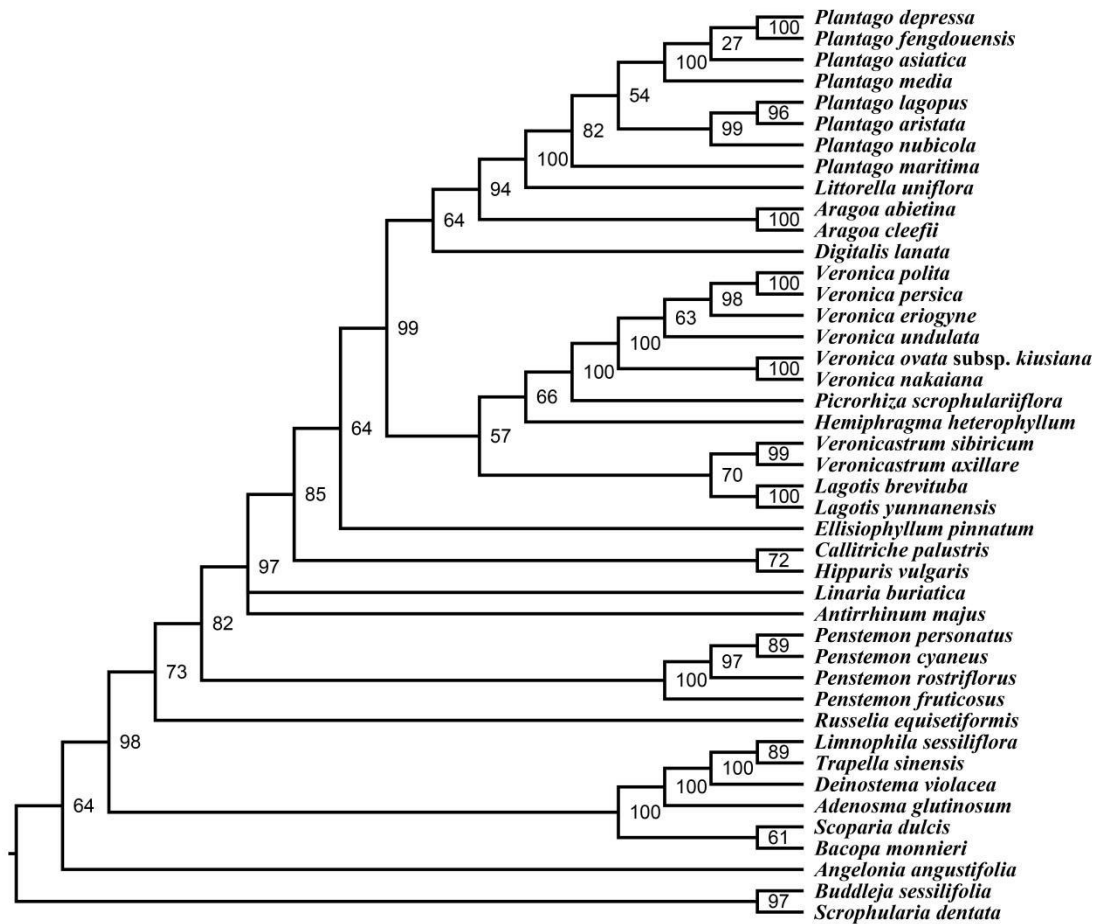

Maximum likelihood tree of Plantaginaceae based on *atpA* gene. Values at nodes represent the bootstrap support values. Nodes <10% bootstrap support were collapsed

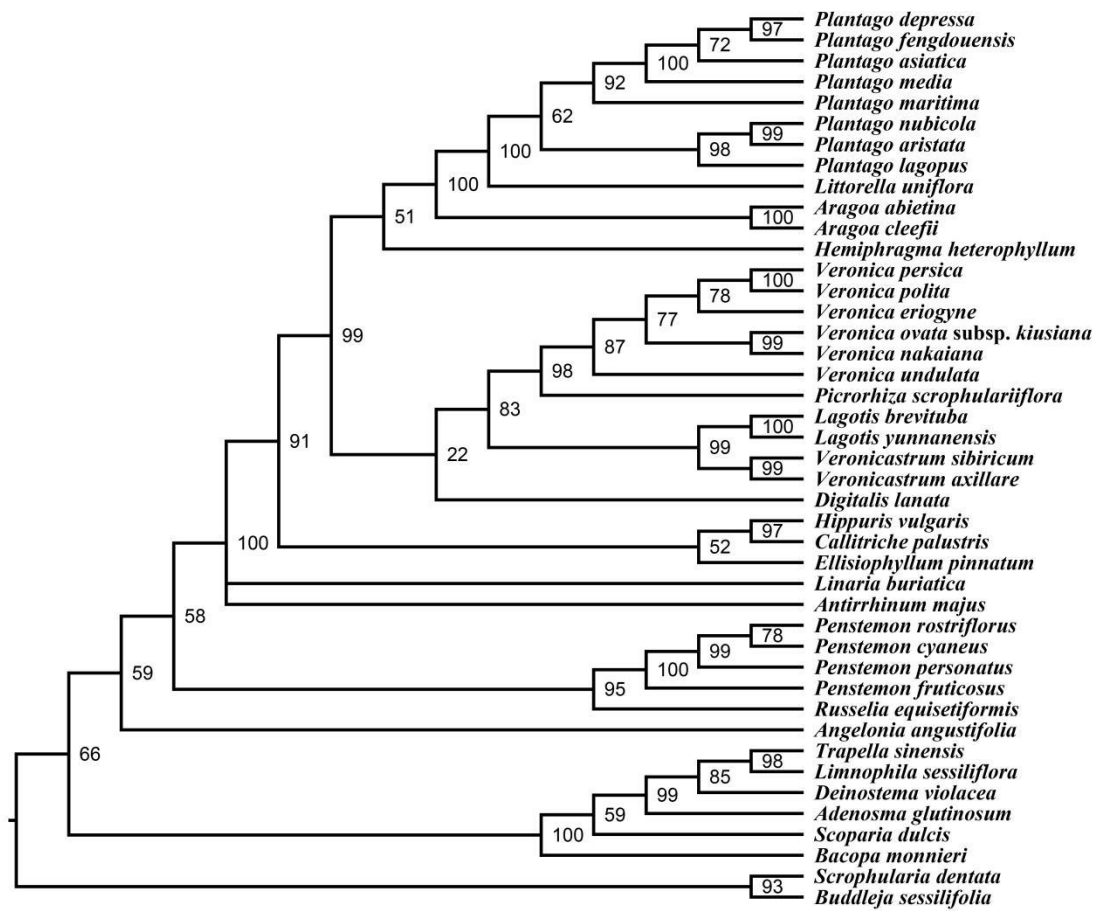

Maximum likelihood tree of Plantaginaceae based on **atpB** gene. Values at nodes represent the bootstrap support values. Nodes <10% bootstrap support were collapsed

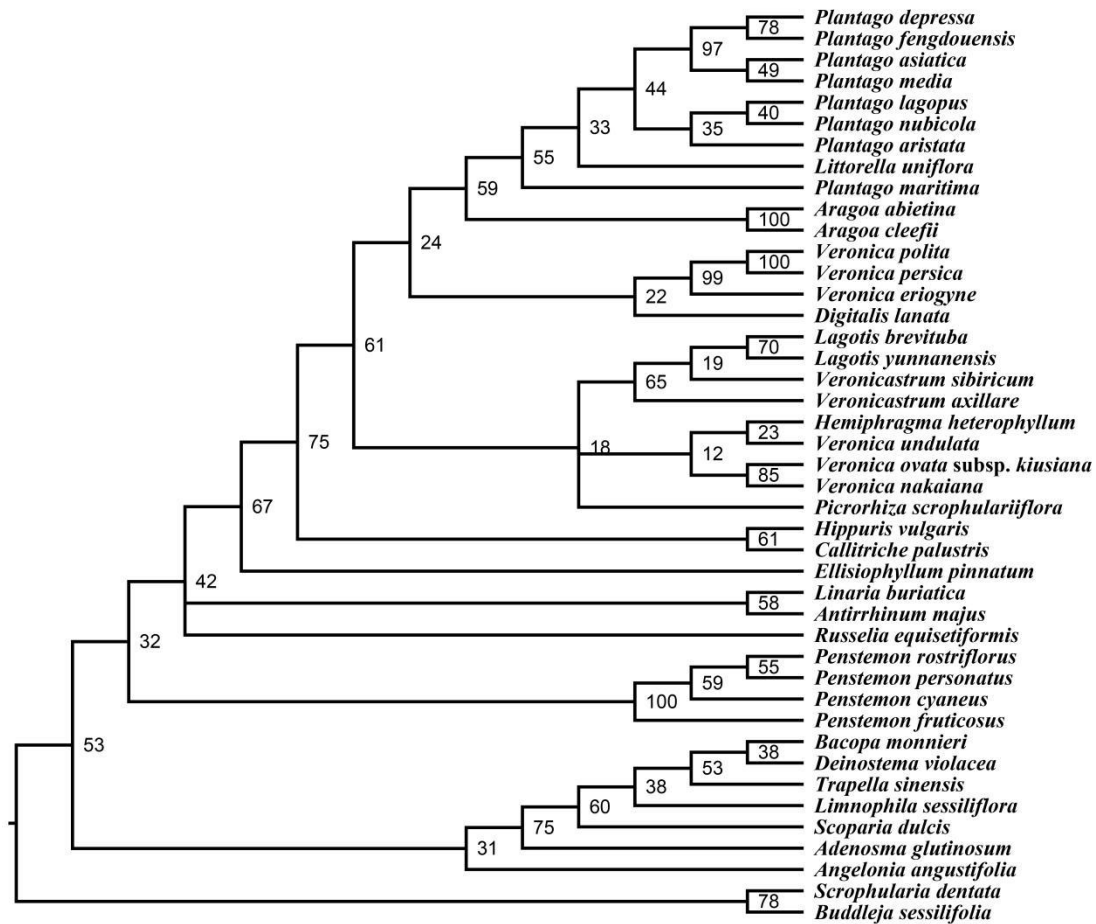

Maximum likelihood tree of Plantaginaceae based on *atpE* gene. Values at nodes represent the bootstrap support values. Nodes <10% bootstrap support were collapsed



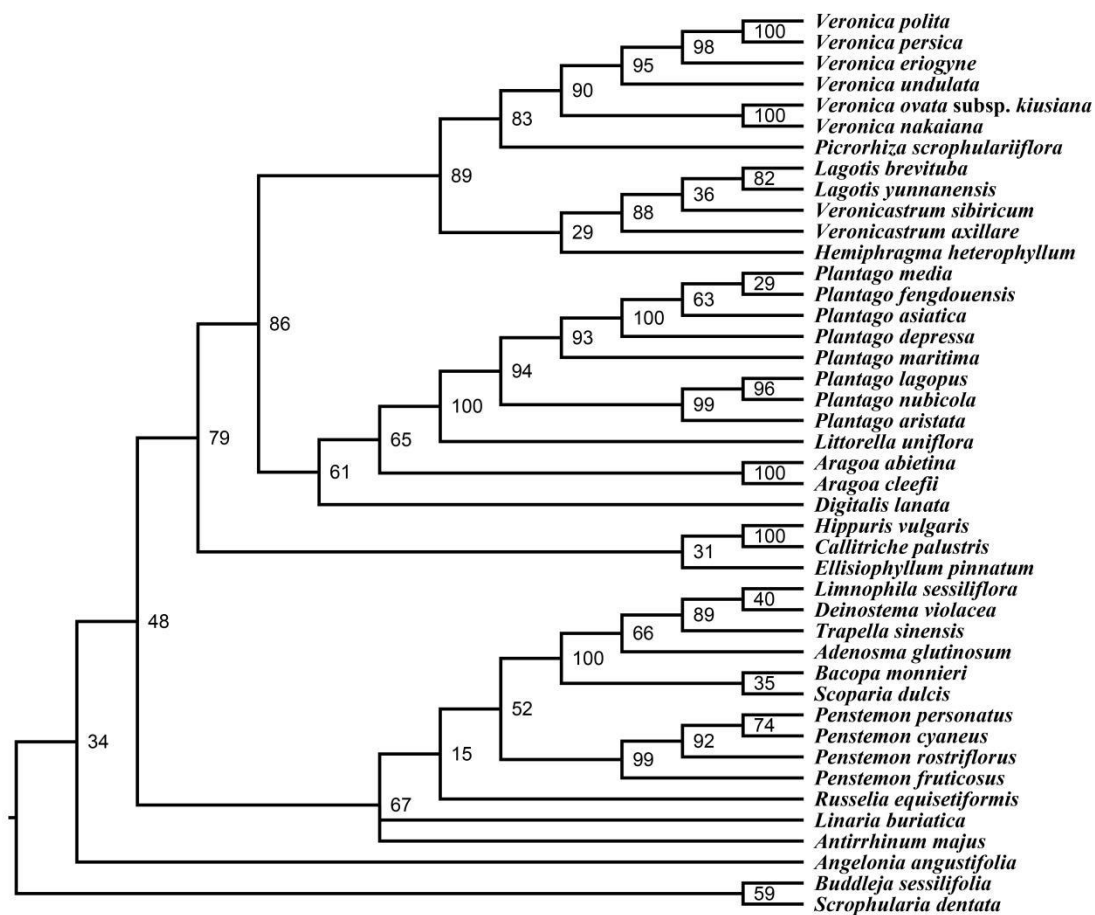

Maximum likelihood tree of Plantaginaceae based on *atpF* gene. Values at nodes represent the bootstrap support values. Nodes <10% bootstrap support were collapsed

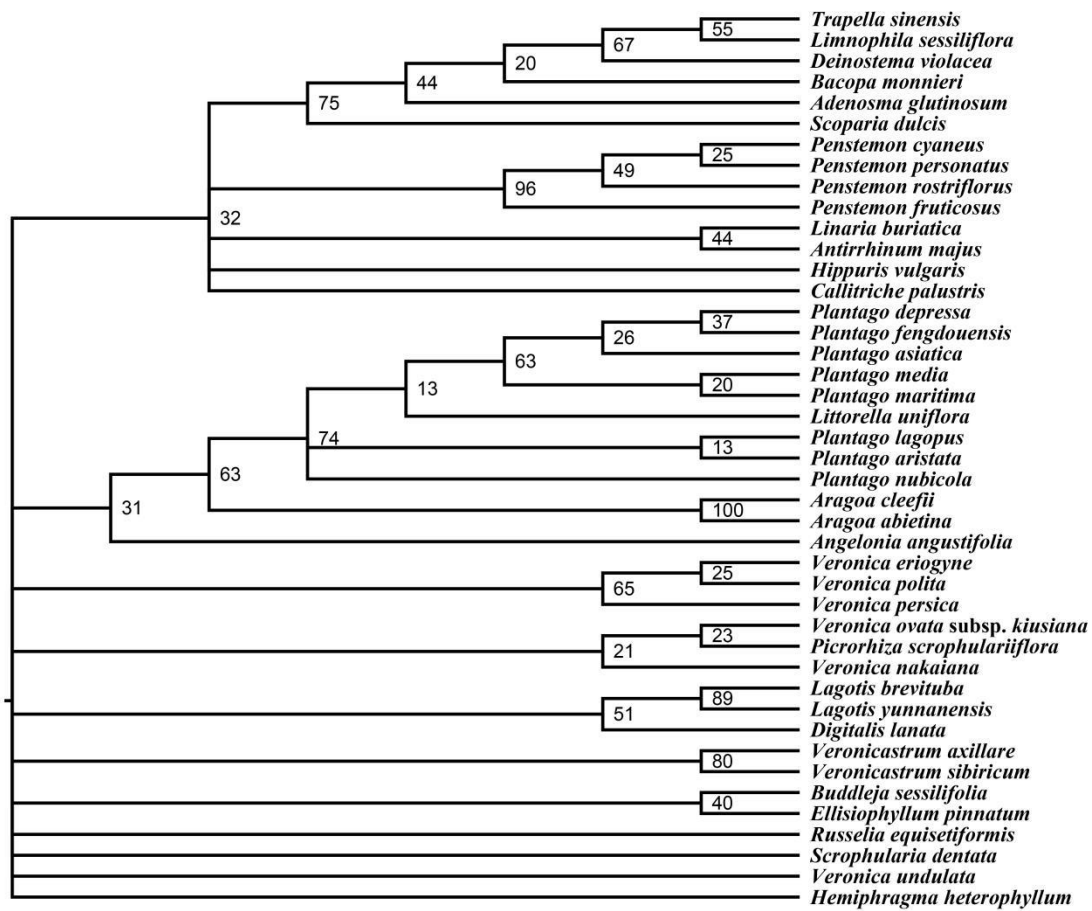

Maximum likelihood tree of Plantaginaceae based on *atpH* gene. Values at nodes represent the bootstrap support values. Nodes <10% bootstrap support were collapsed

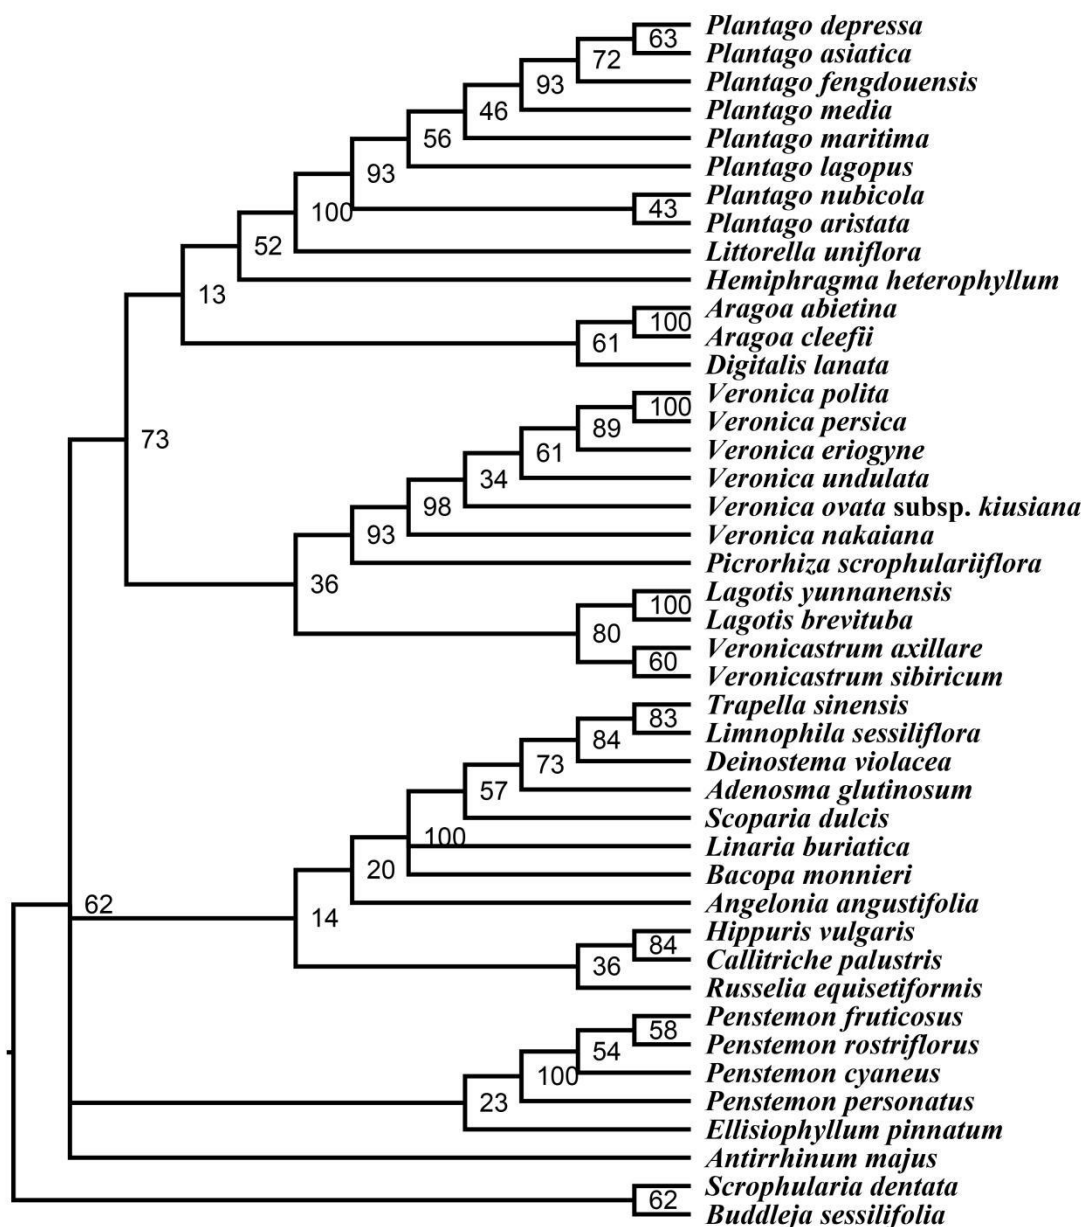

Maximum likelihood tree of Plantaginaceae based on *atpI* gene. Values at nodes represent the bootstrap support values. Nodes <10% bootstrap support were collapsed

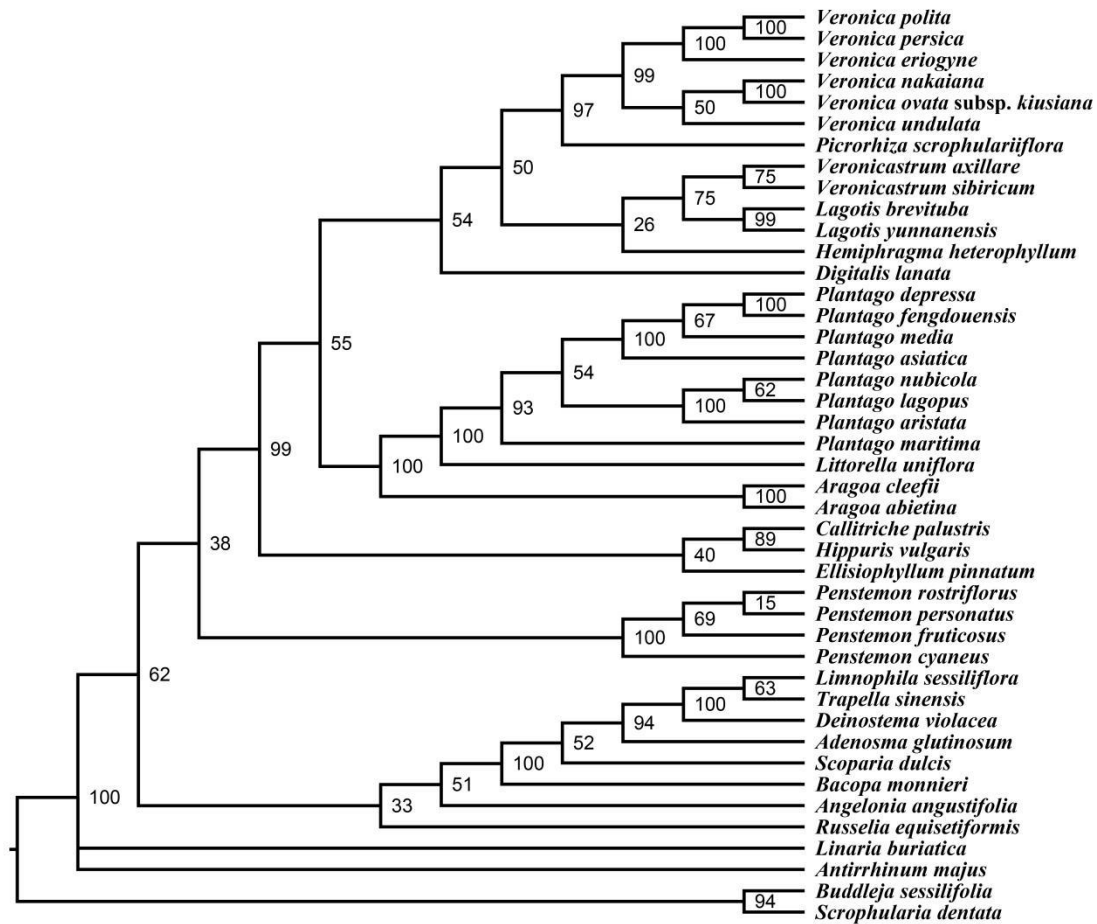

Maximum likelihood tree of Plantaginaceae based on *ccsA* gene. Values at nodes represent the bootstrap support values. Nodes <10% bootstrap support were collapsed

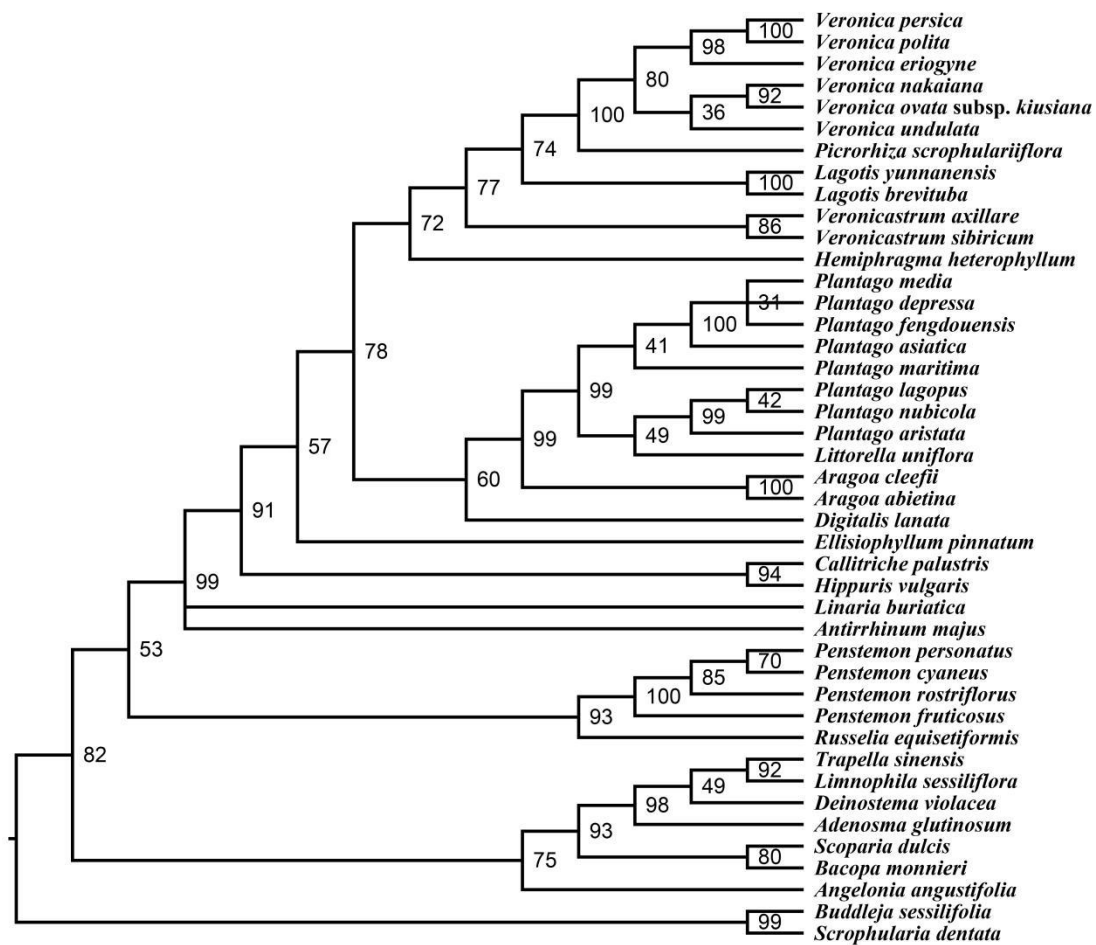

Maximum likelihood tree of Plantaginaceae based on **cemaA** gene. Values at nodes represent the bootstrap support values. Nodes <10% bootstrap support were collapsed

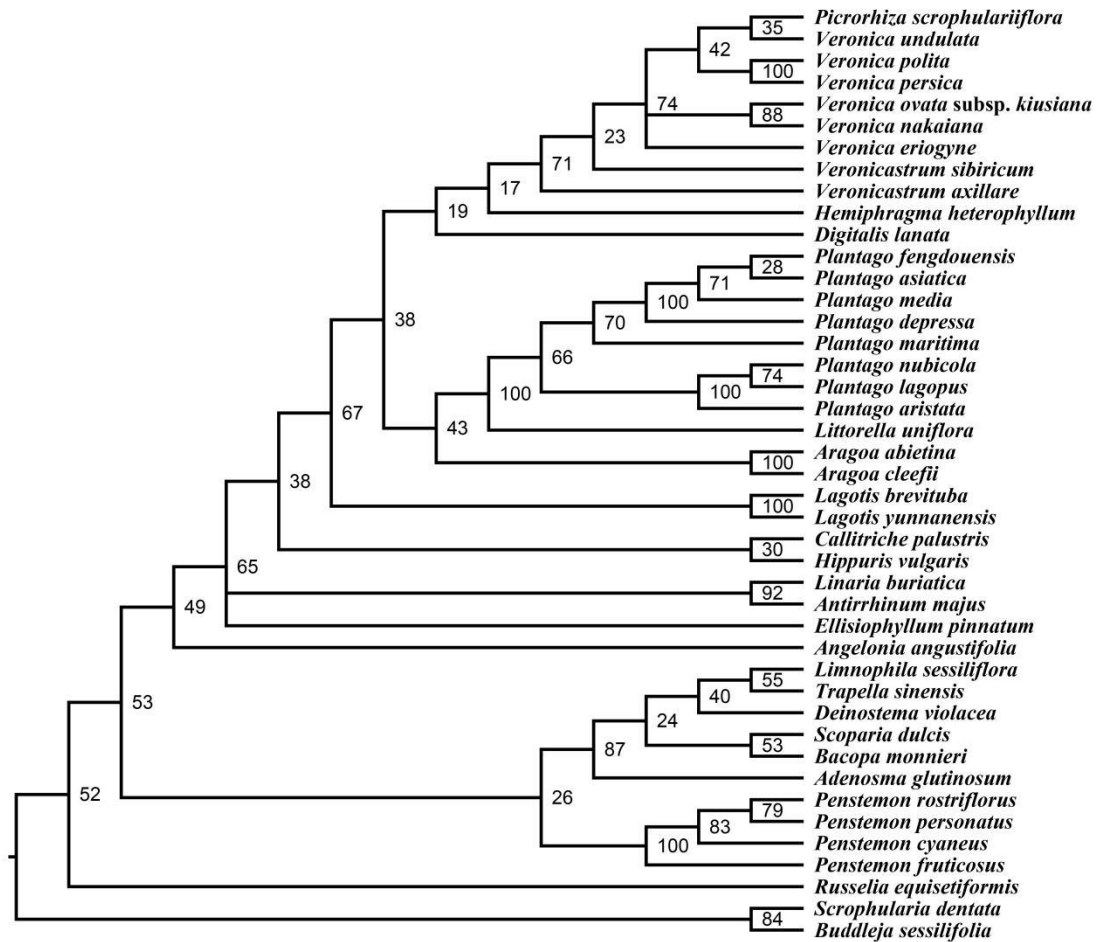

Maximum likelihood tree of Plantaginaceae based on *clpP* gene. Values at nodes represent the bootstrap support values. Nodes <10% bootstrap support were collapsed

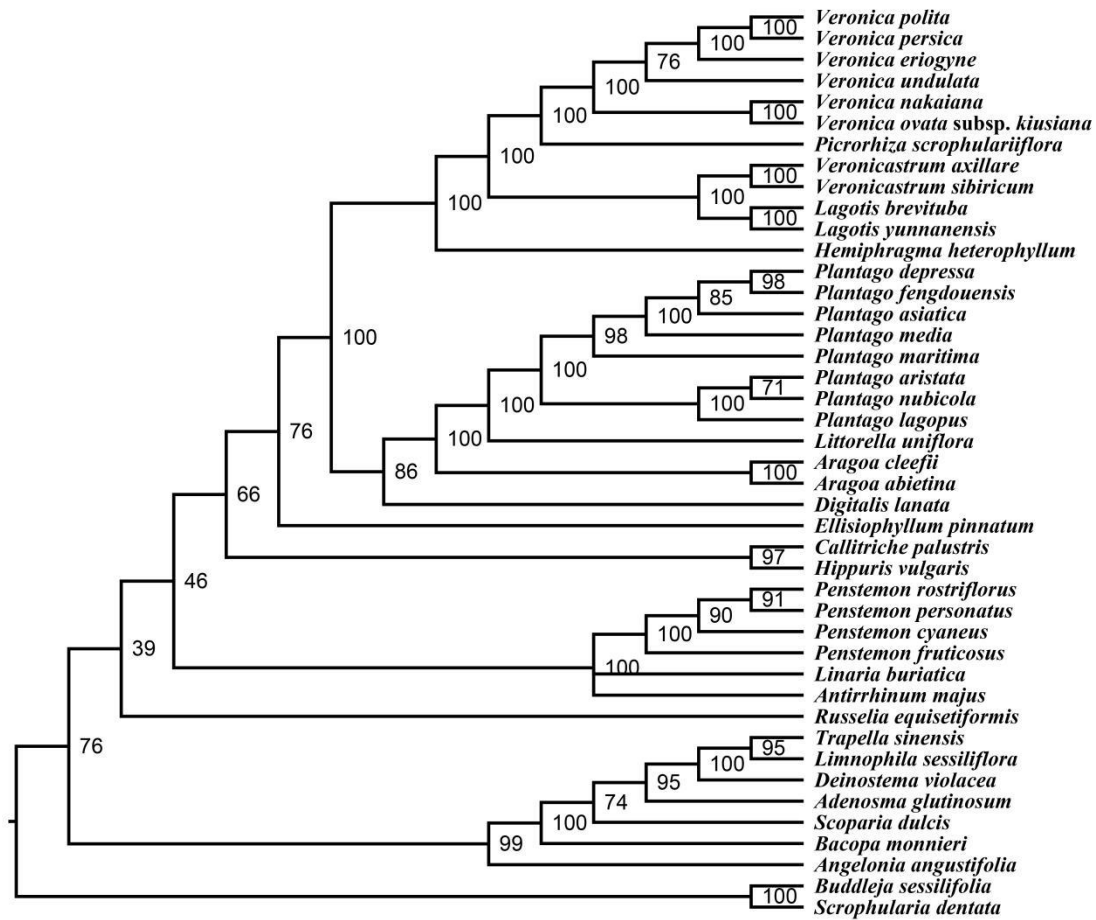

Maximum likelihood tree of Plantaginaceae based on **matK** gene. Values at nodes represent the bootstrap support values. Nodes <10% bootstrap support were collapsed

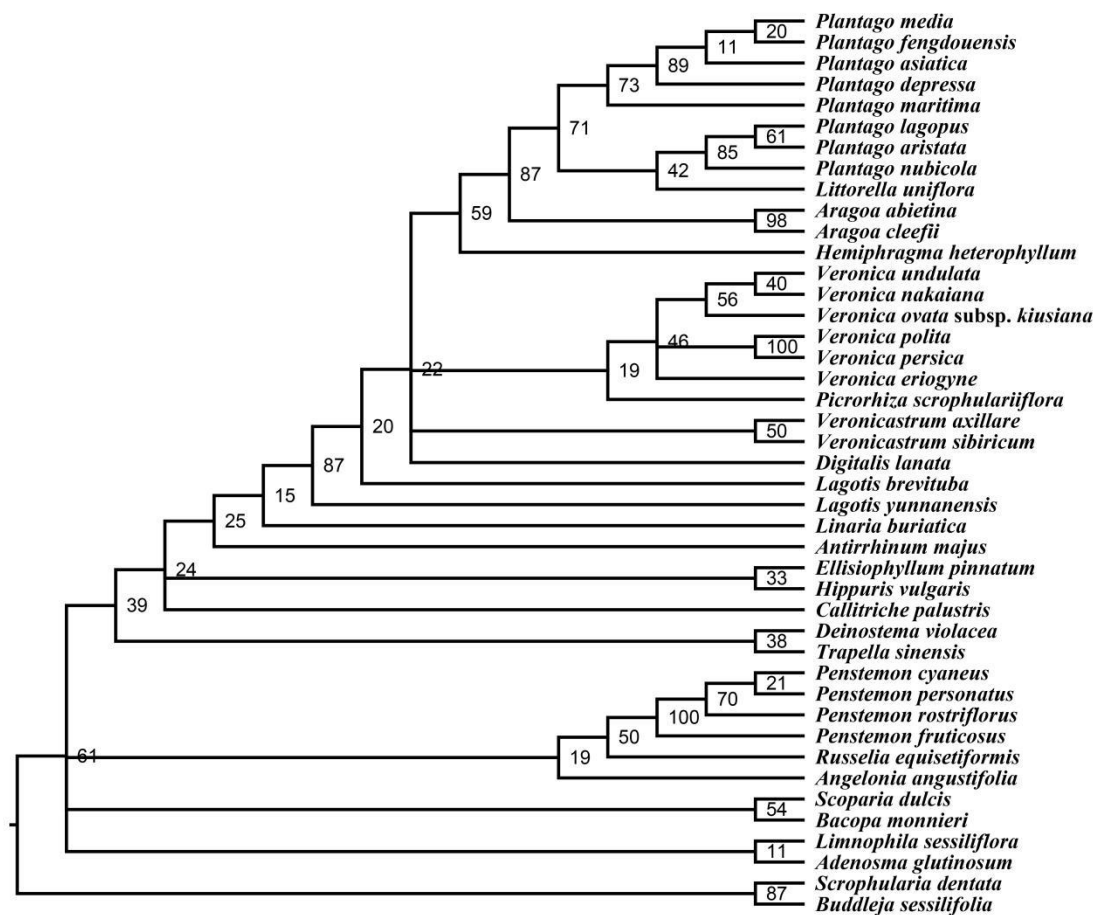

Maximum likelihood tree of Plantaginaceae based on **ndhE** gene. Values at nodes represent the bootstrap support values. Nodes <10% bootstrap support were collapsed



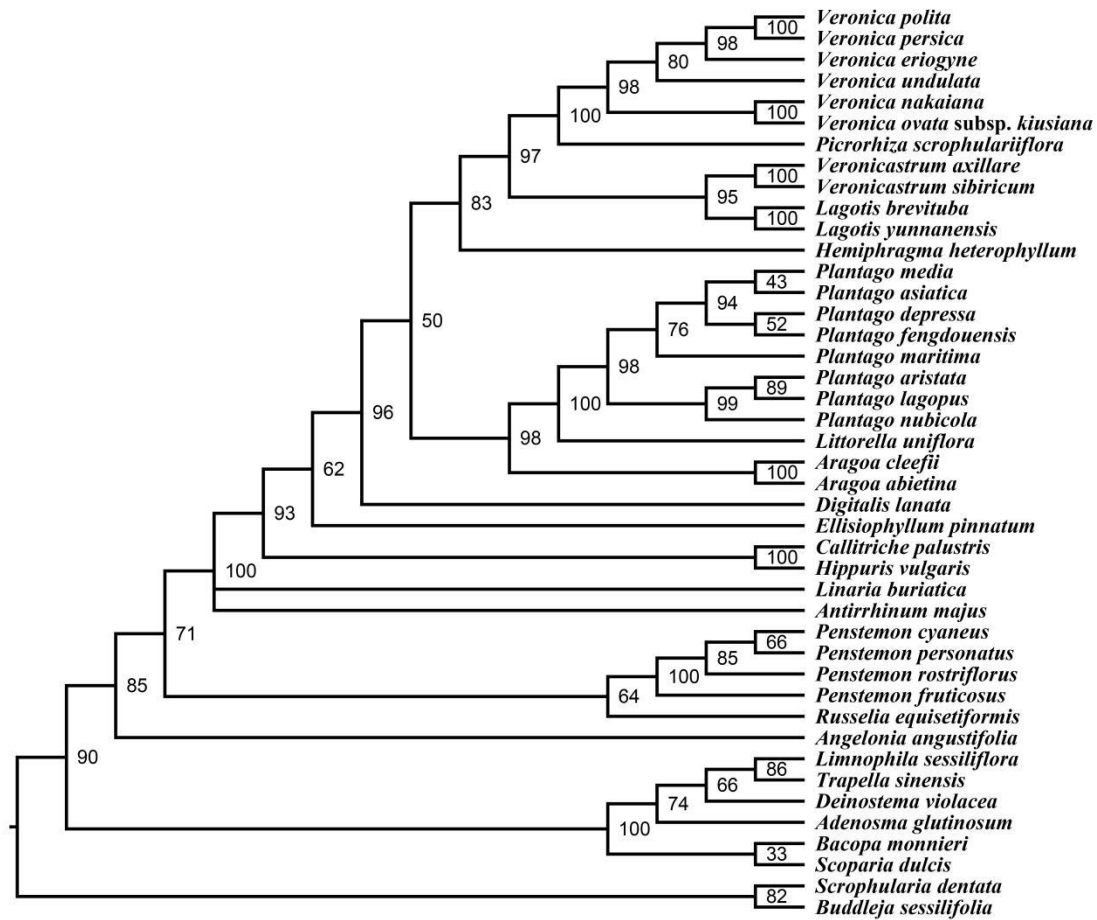

Maximum likelihood tree of Plantaginaceae based on **petA** gene. Values at nodes represent the bootstrap support values. Nodes <10% bootstrap support were collapsed

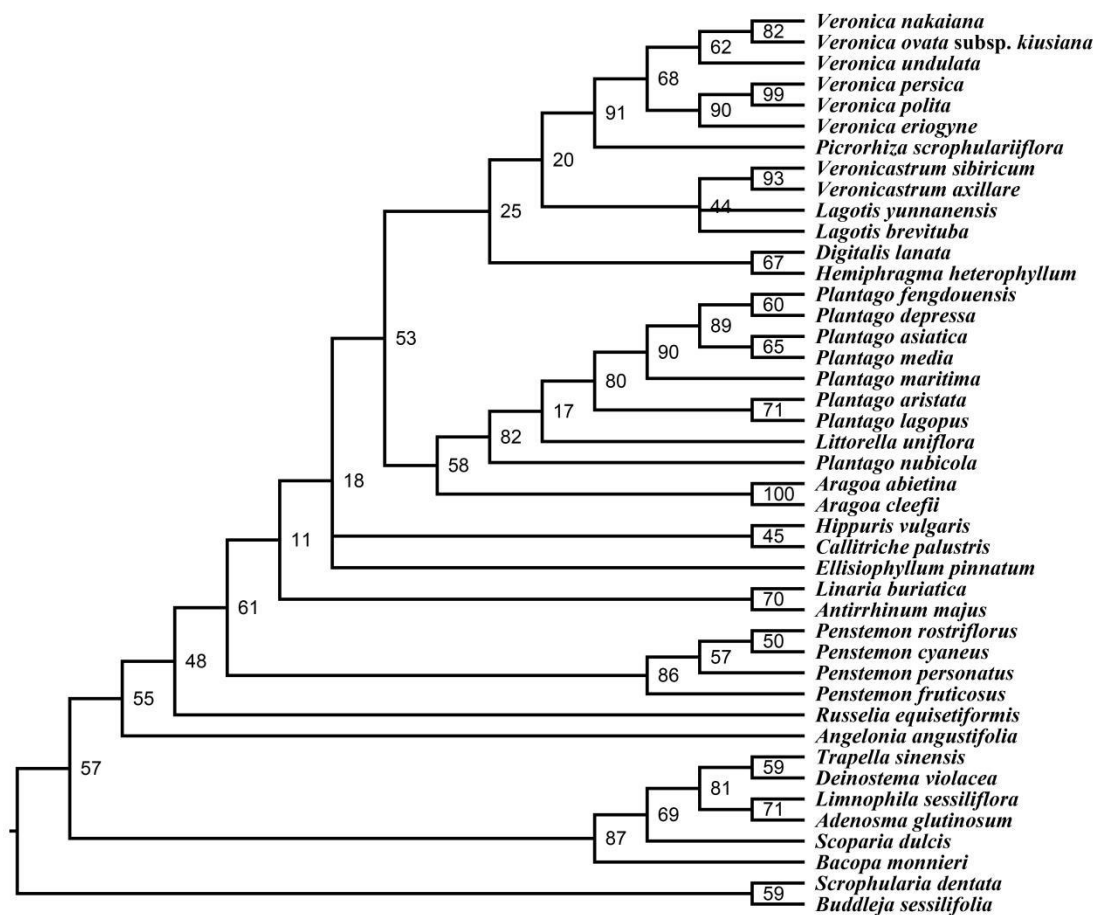

Maximum likelihood tree of Plantaginaceae based on **petB** gene. Values at nodes represent the bootstrap support values. Nodes <10% bootstrap support were collapsed

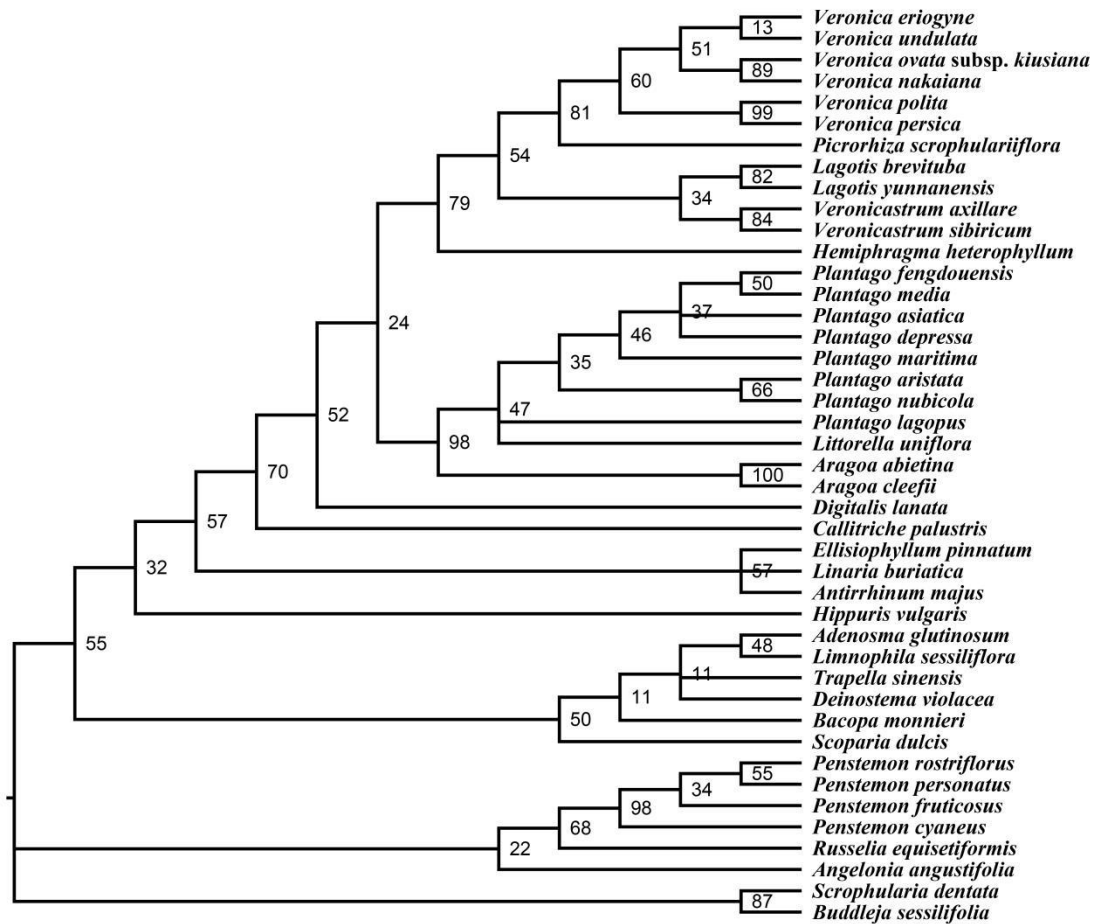

Maximum likelihood tree of Plantaginaceae based on **petD** gene. Values at nodes represent the bootstrap support values. Nodes <10% bootstrap support were collapsed

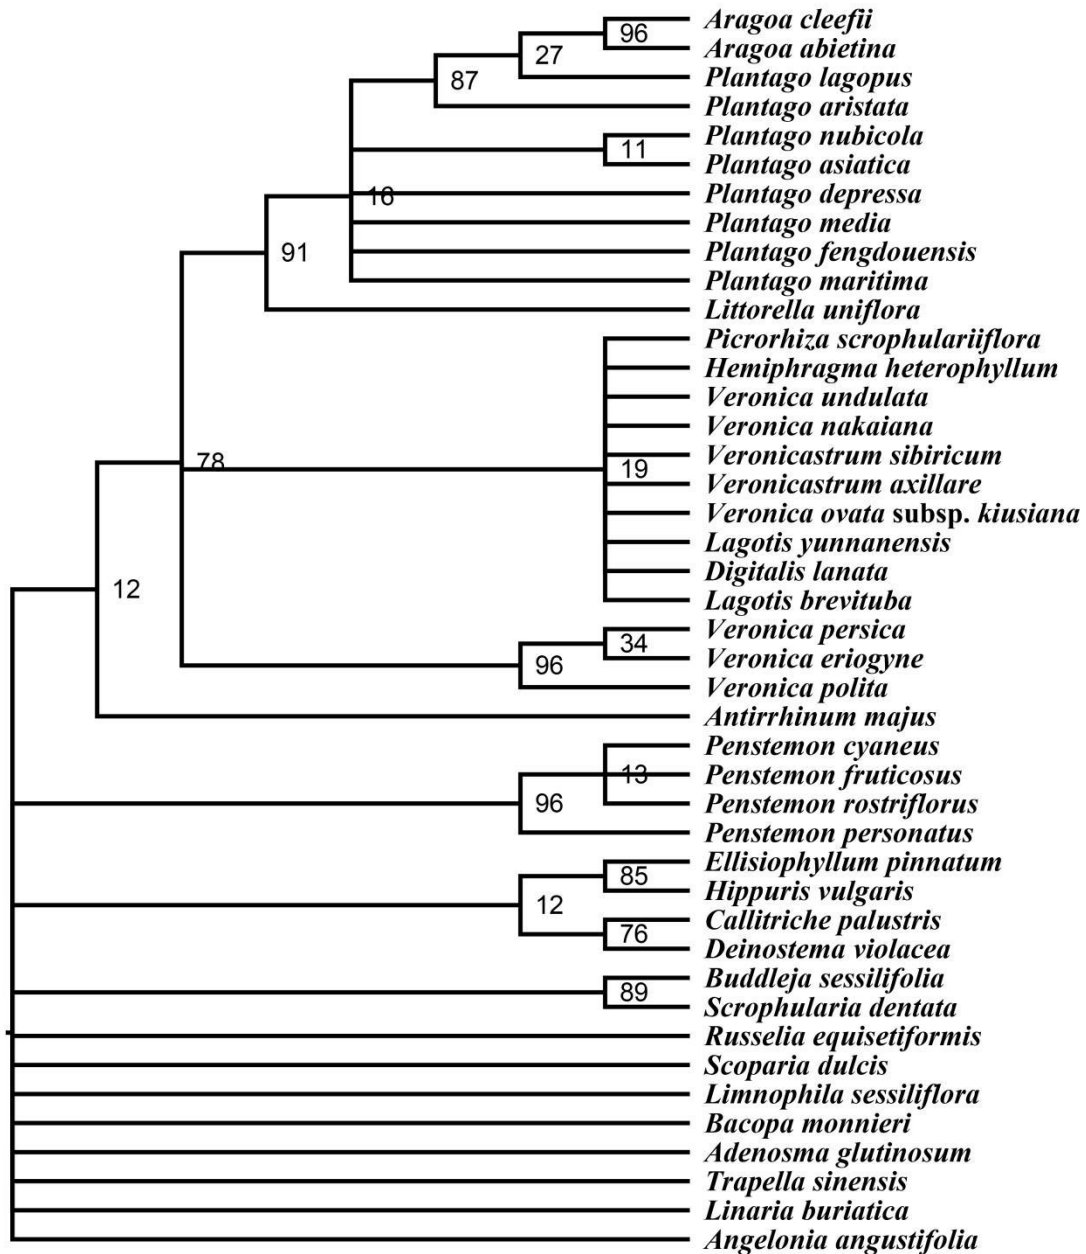

Maximum likelihood tree of Plantaginaceae based on *petG* gene. Values at nodes represent the bootstrap support values. Nodes <10% bootstrap support were collapsed

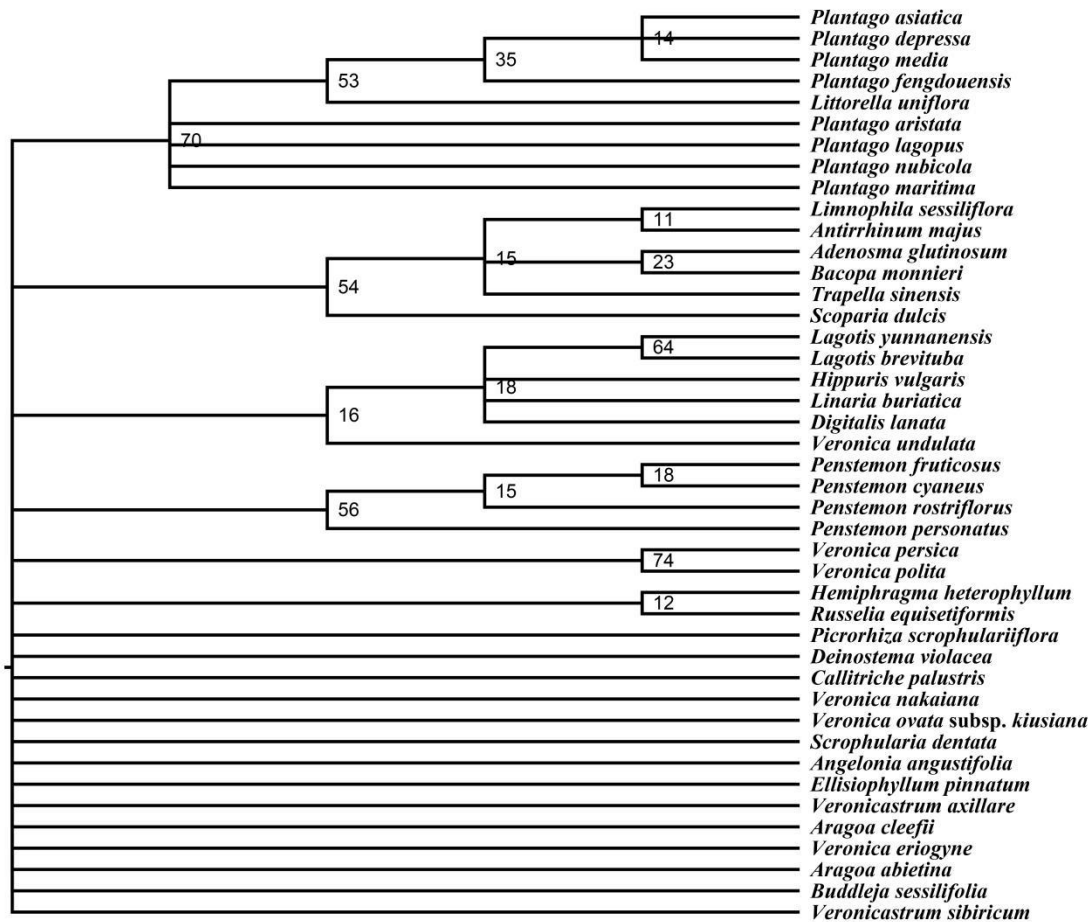

Maximum likelihood tree of Plantaginaceae based on **petL** gene. Values at nodes represent the bootstrap support values. Nodes <10% bootstrap support were collapsed

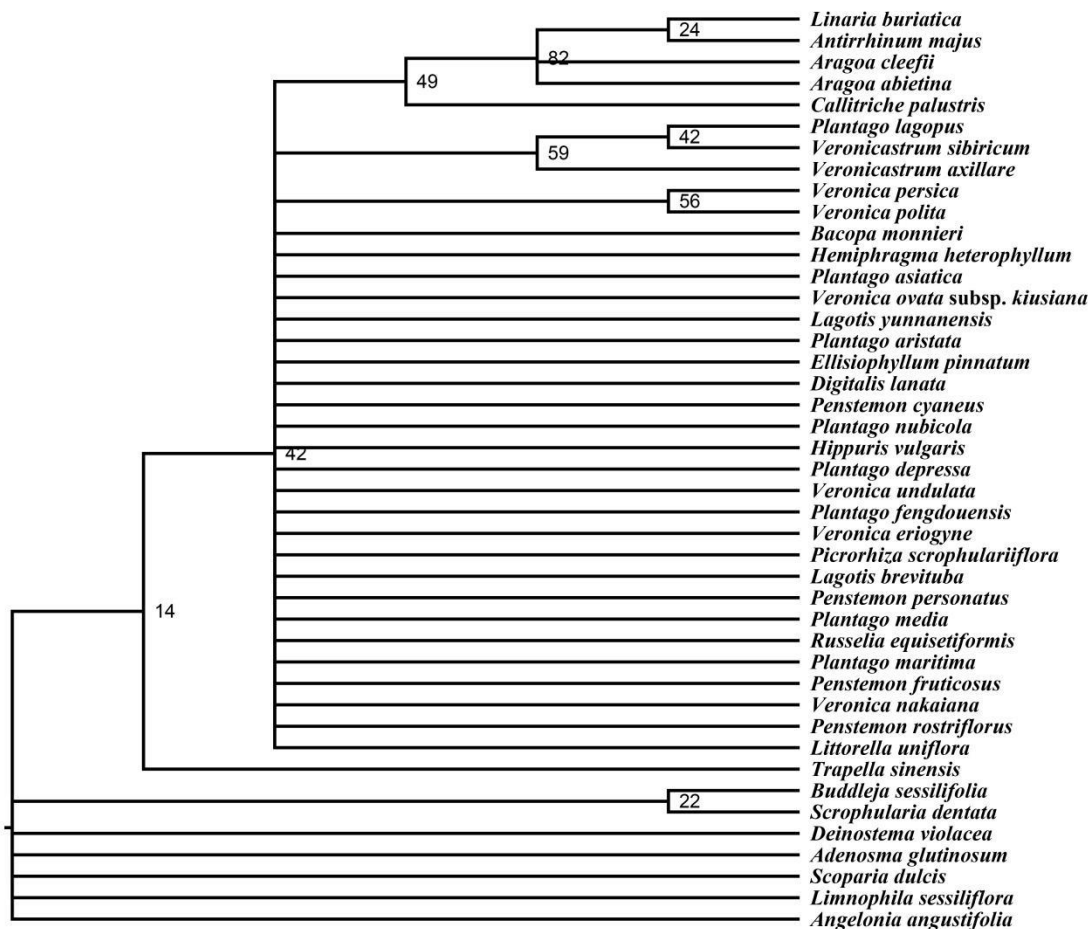

Maximum likelihood tree of Plantaginaceae based on **petN** gene. Values at nodes represent the bootstrap support values. Nodes <10% bootstrap support were collapsed

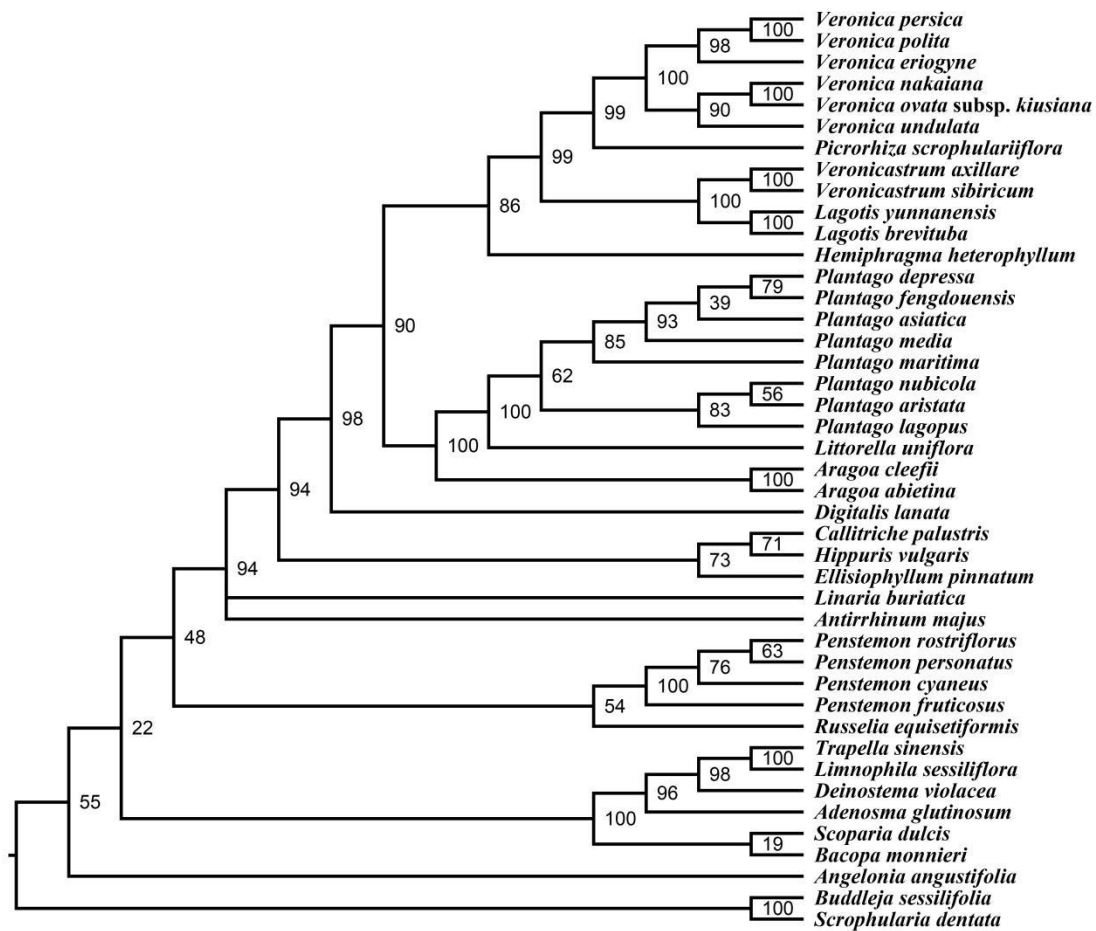

Maximum likelihood tree of Plantaginaceae based on *psaA* gene. Values at nodes represent the bootstrap support values. Nodes <10% bootstrap support were collapsed

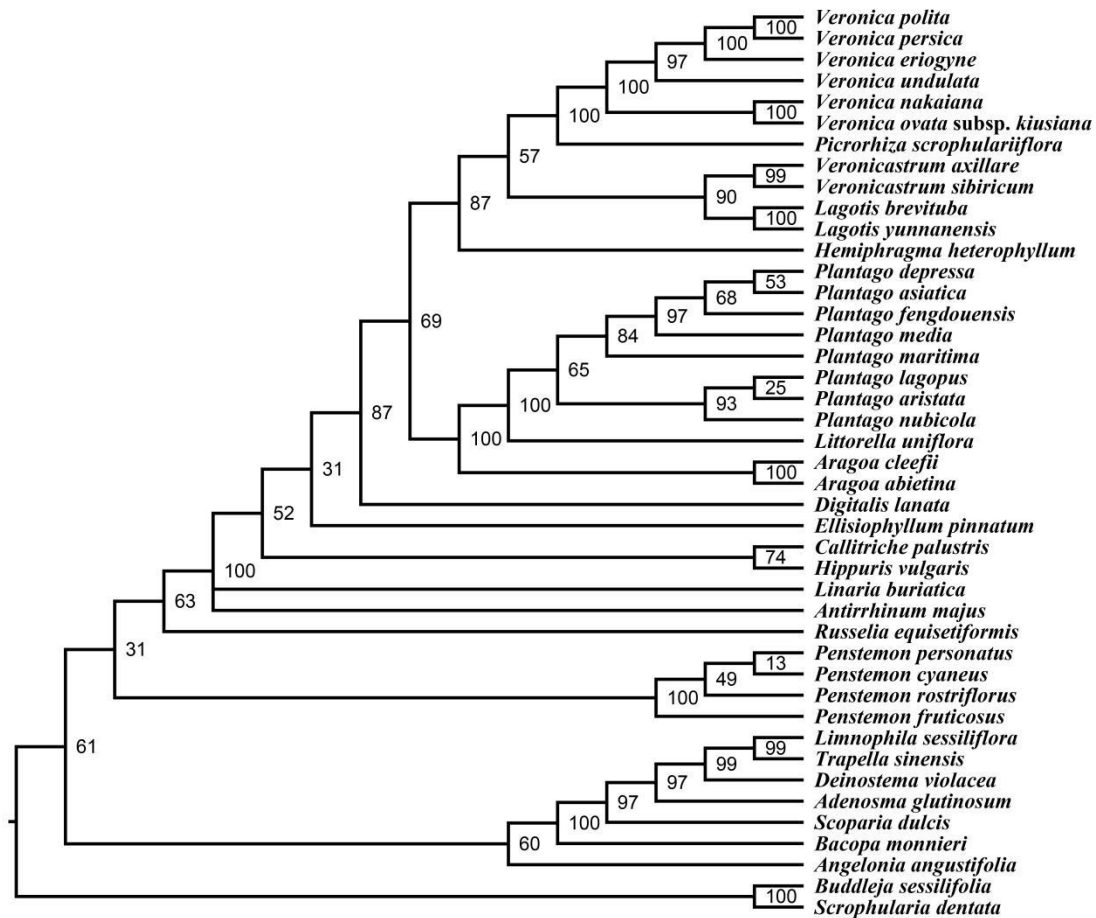

Maximum likelihood tree of Plantaginaceae based on **psaB** gene. Values at nodes represent the bootstrap support values. Nodes <10% bootstrap support were collapsed



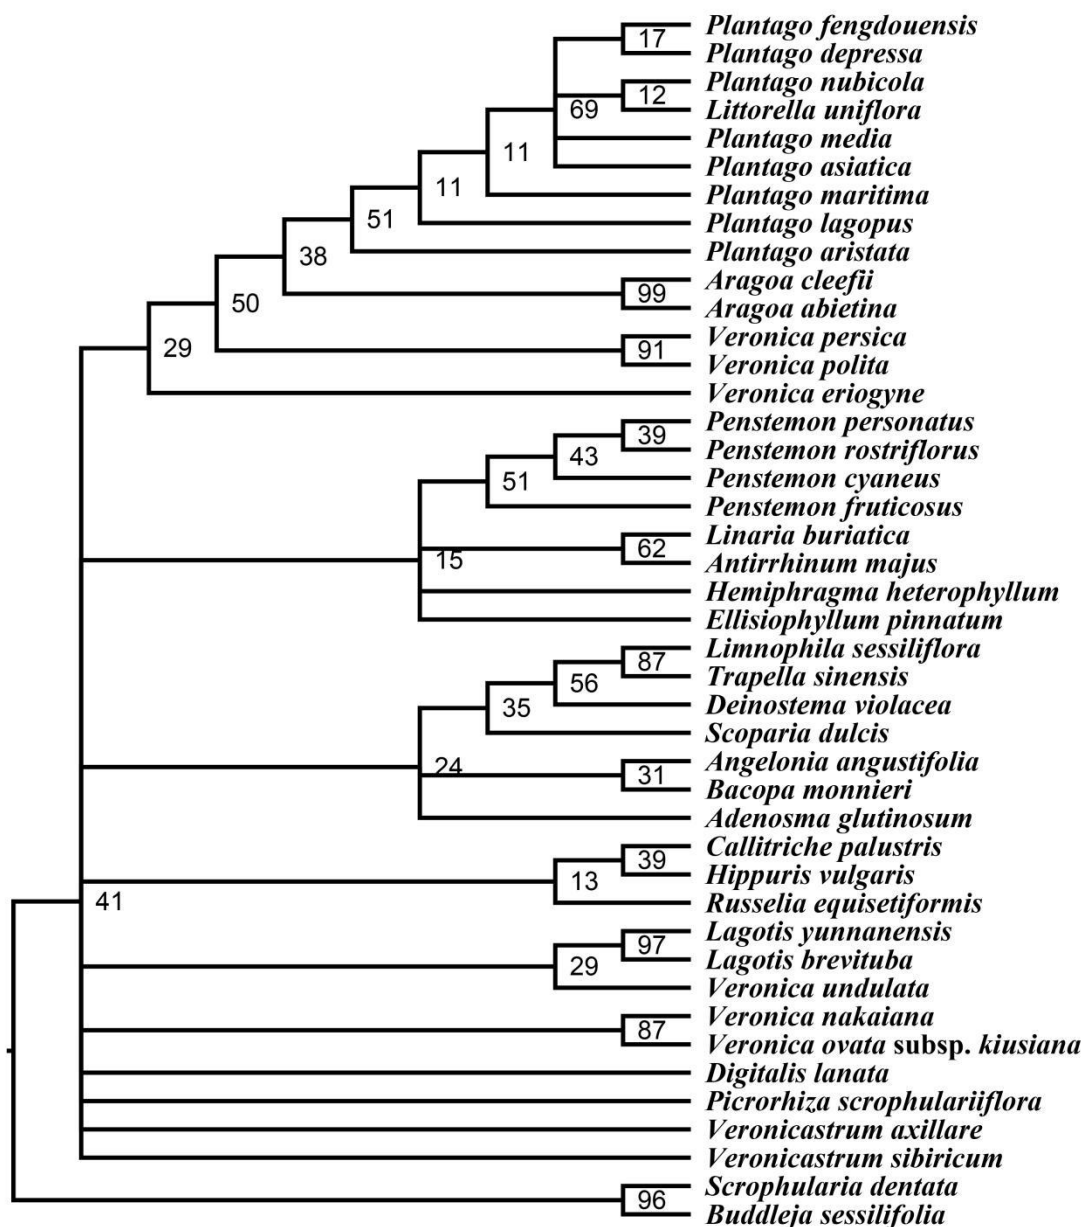

Maximum likelihood tree of Plantaginaceae based on *psaC* gene. Values at nodes represent the bootstrap support values. Nodes <10% bootstrap support were collapsed

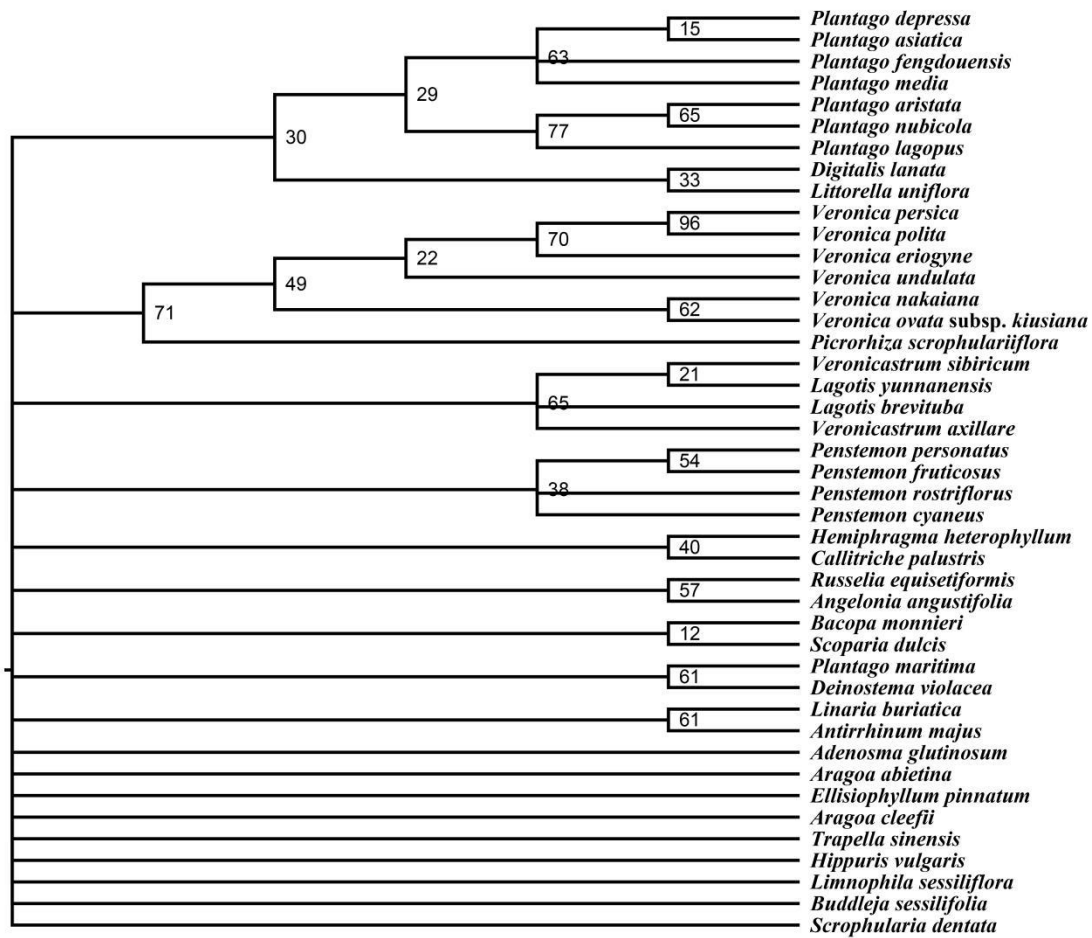

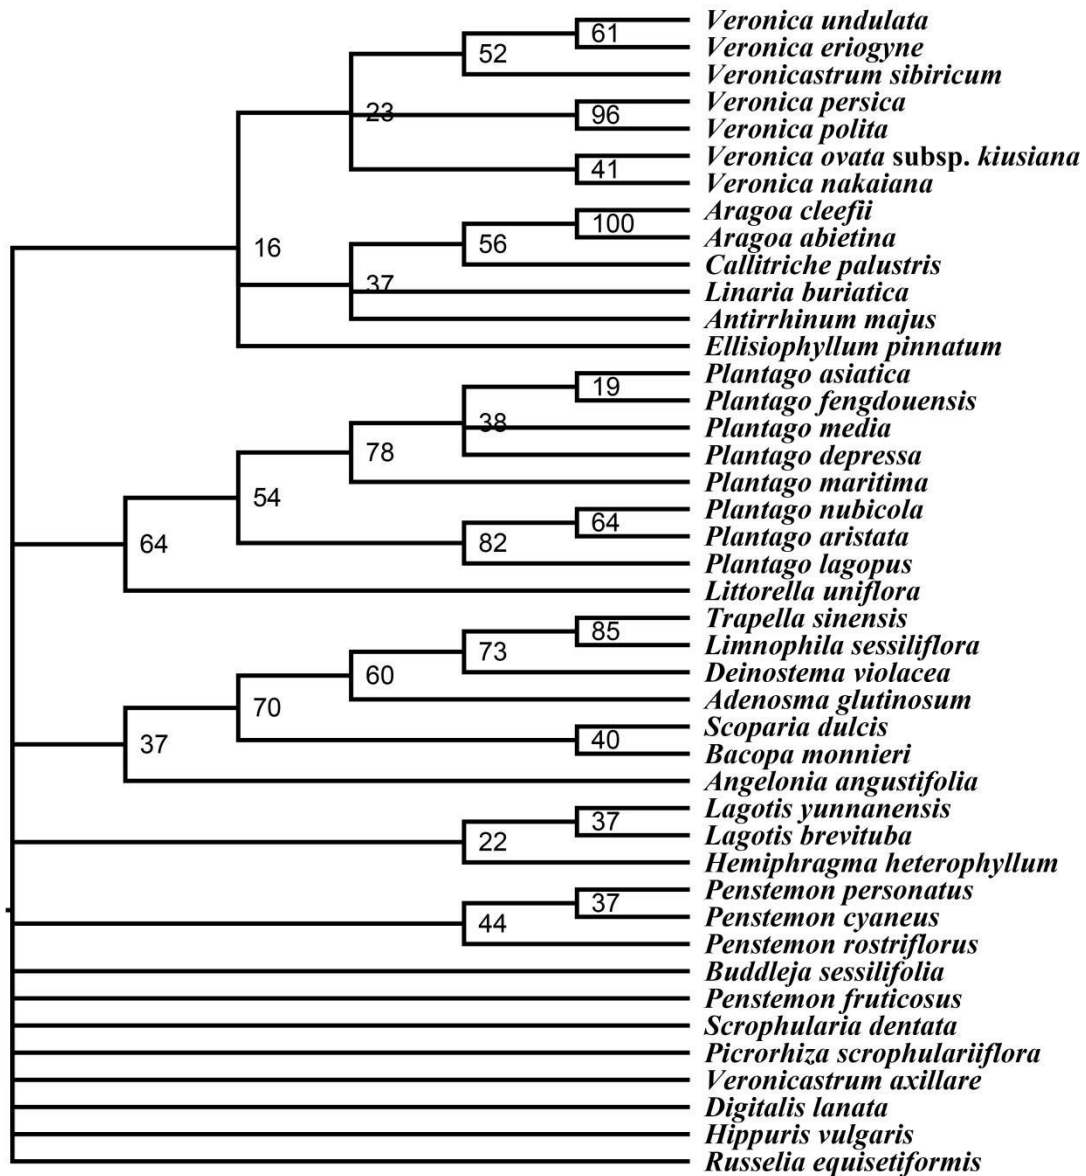

Maximum likelihood tree of Plantaginaceae based on **psaJ** gene. Values at nodes represent the bootstrap support values. Nodes <10% bootstrap support were collapsed

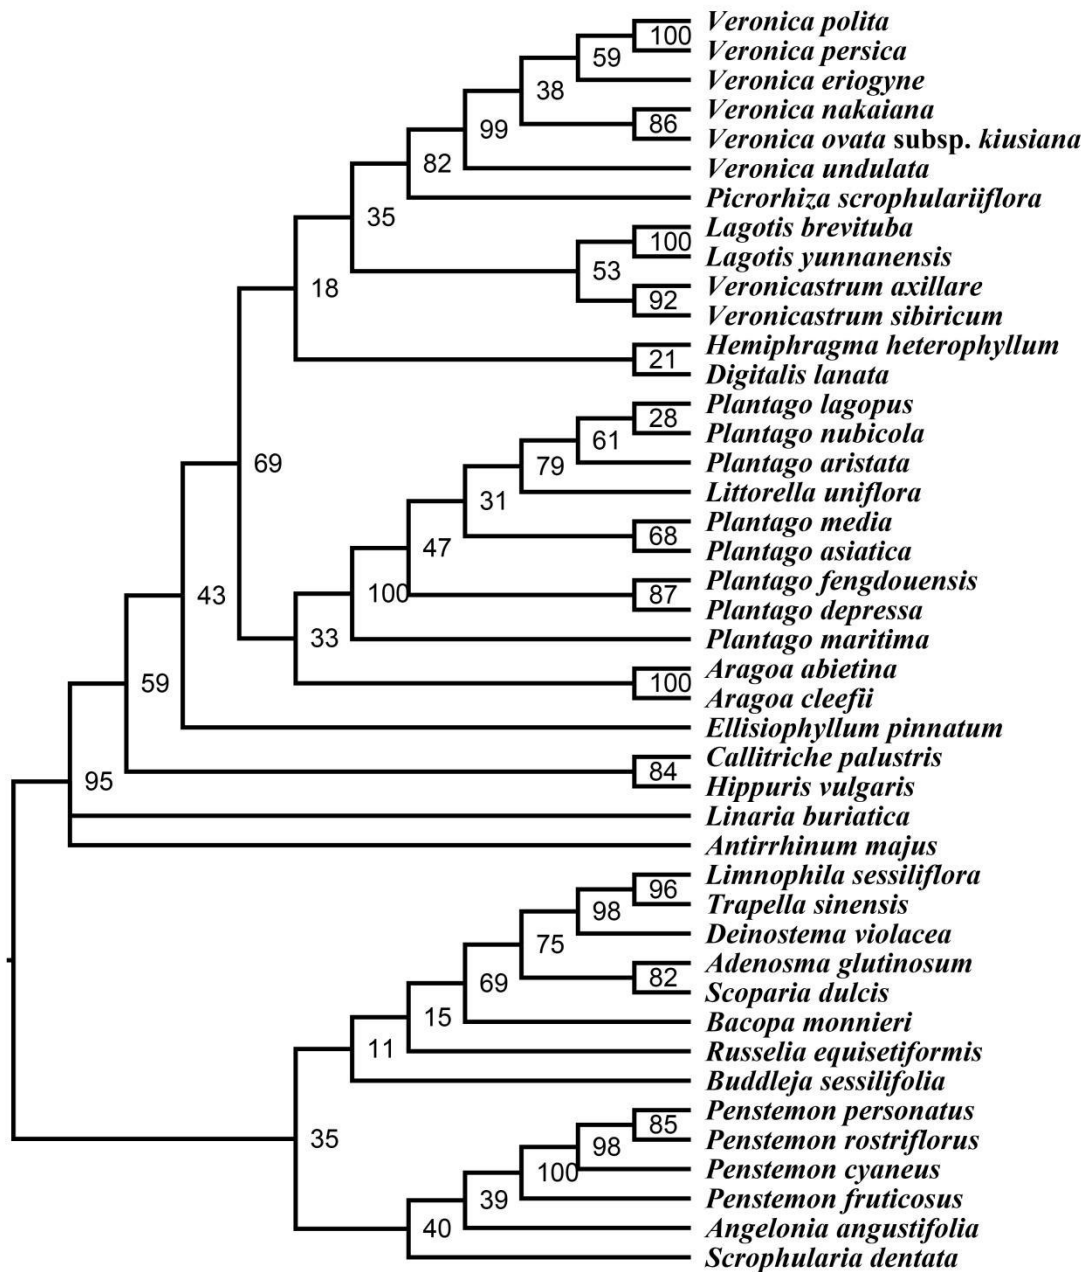

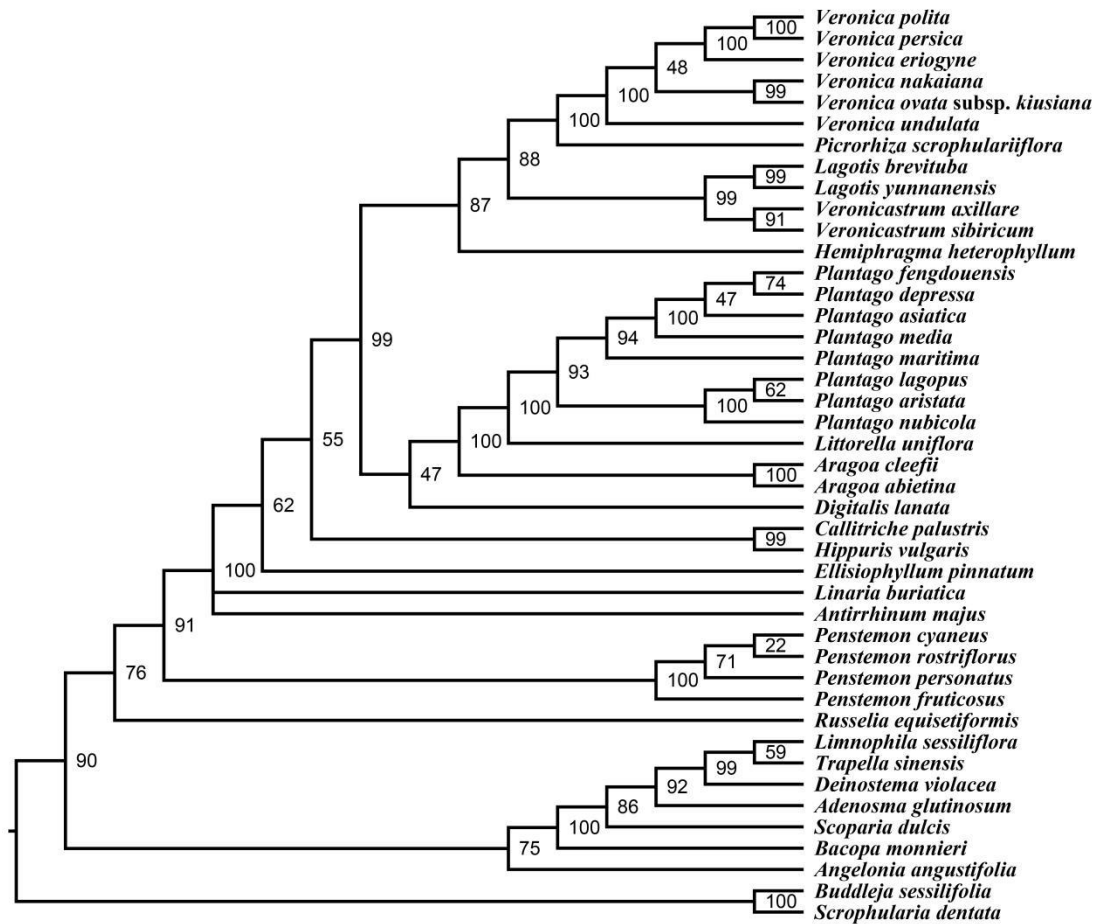

Maximum likelihood tree of Plantaginaceae based on *psbB* gene. Values at nodes represent the bootstrap support values. Nodes <10% bootstrap support were collapsed

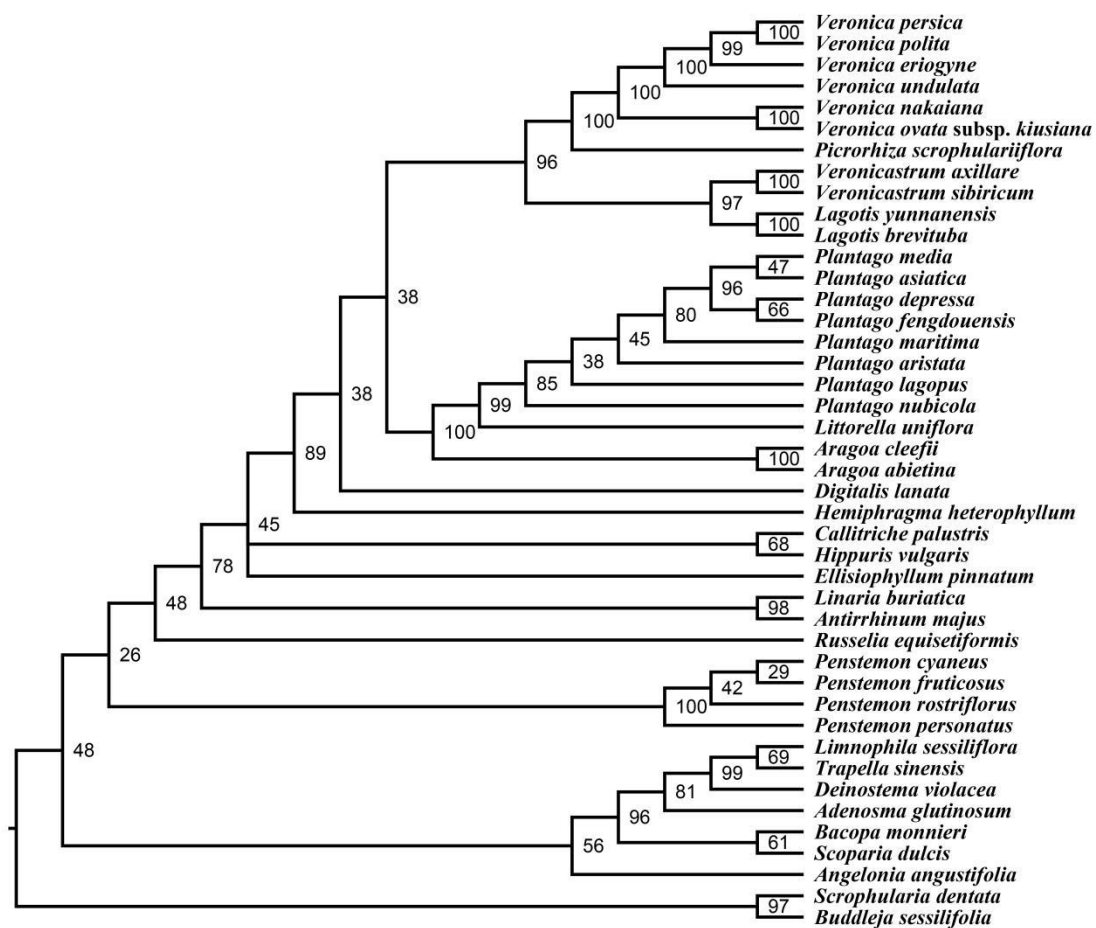

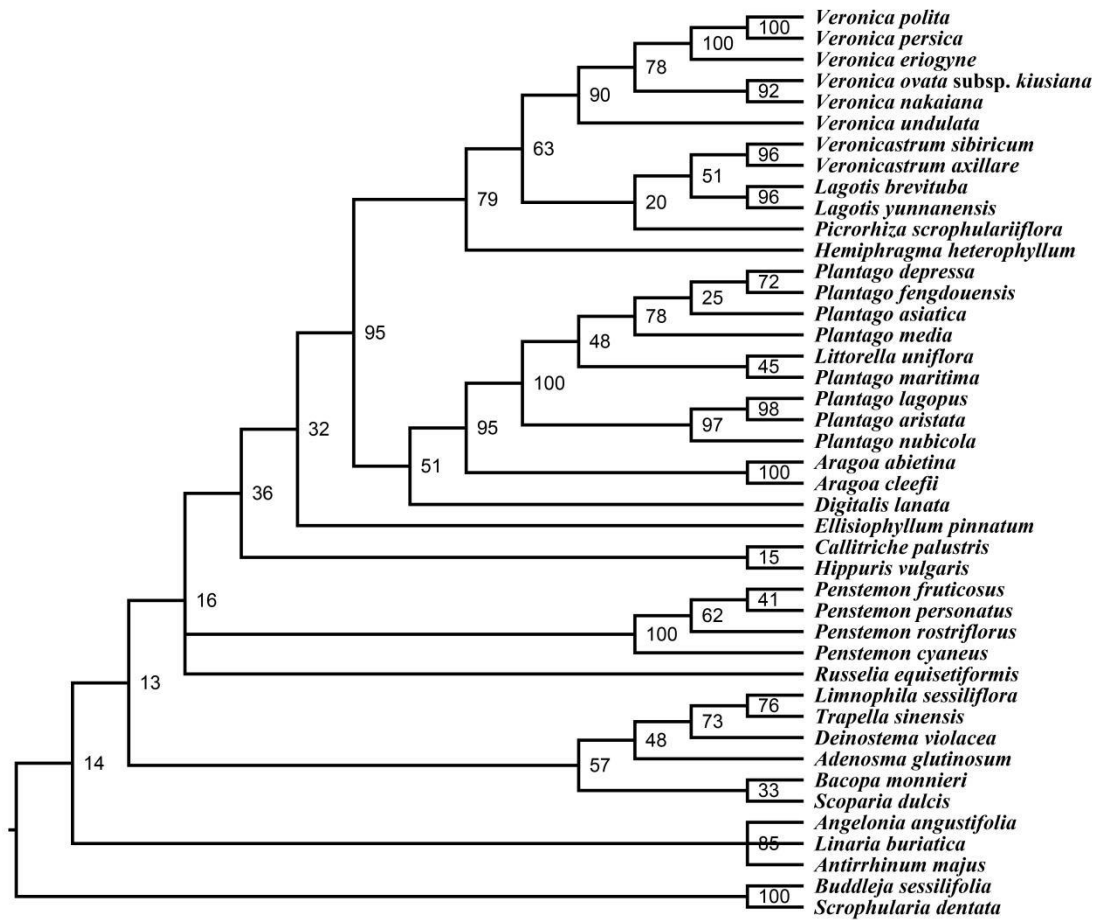

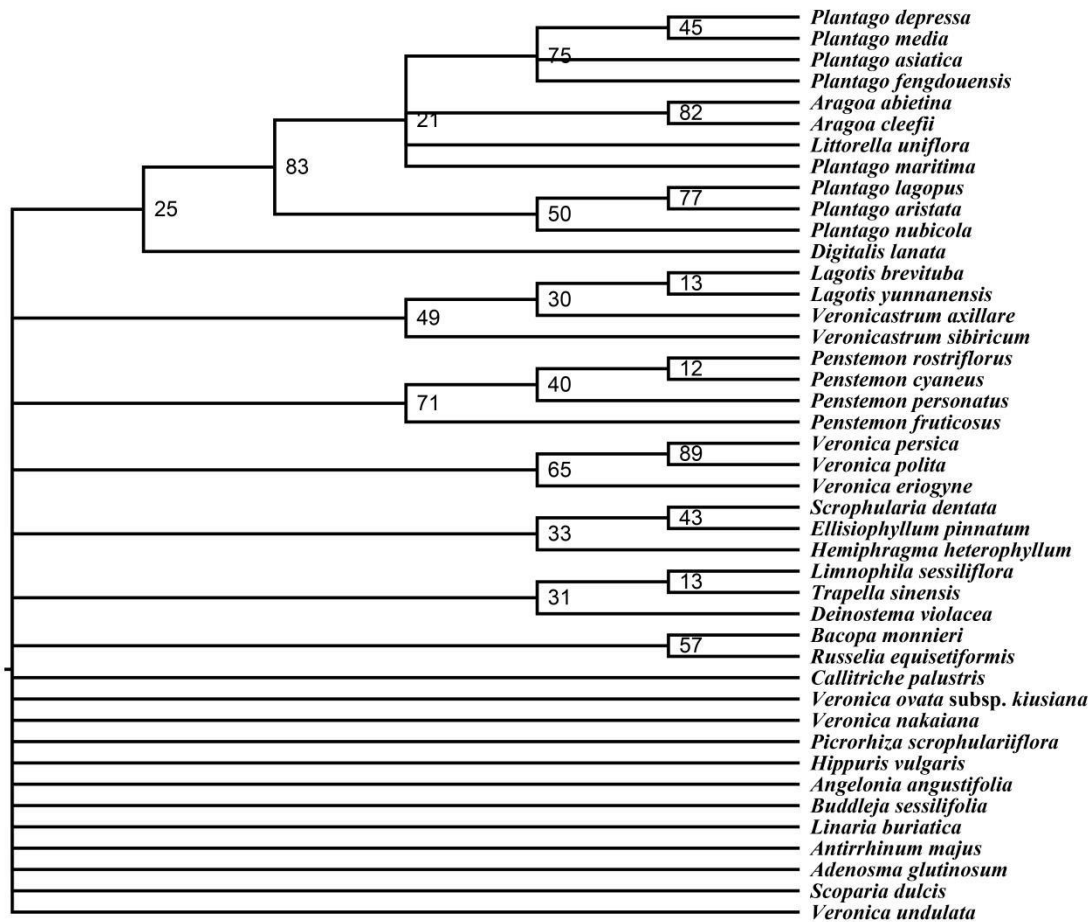

Maximum likelihood tree of Plantaginaceae based on *psbE* gene. Values at nodes represent the bootstrap support values. Nodes <10% bootstrap support were collapsed



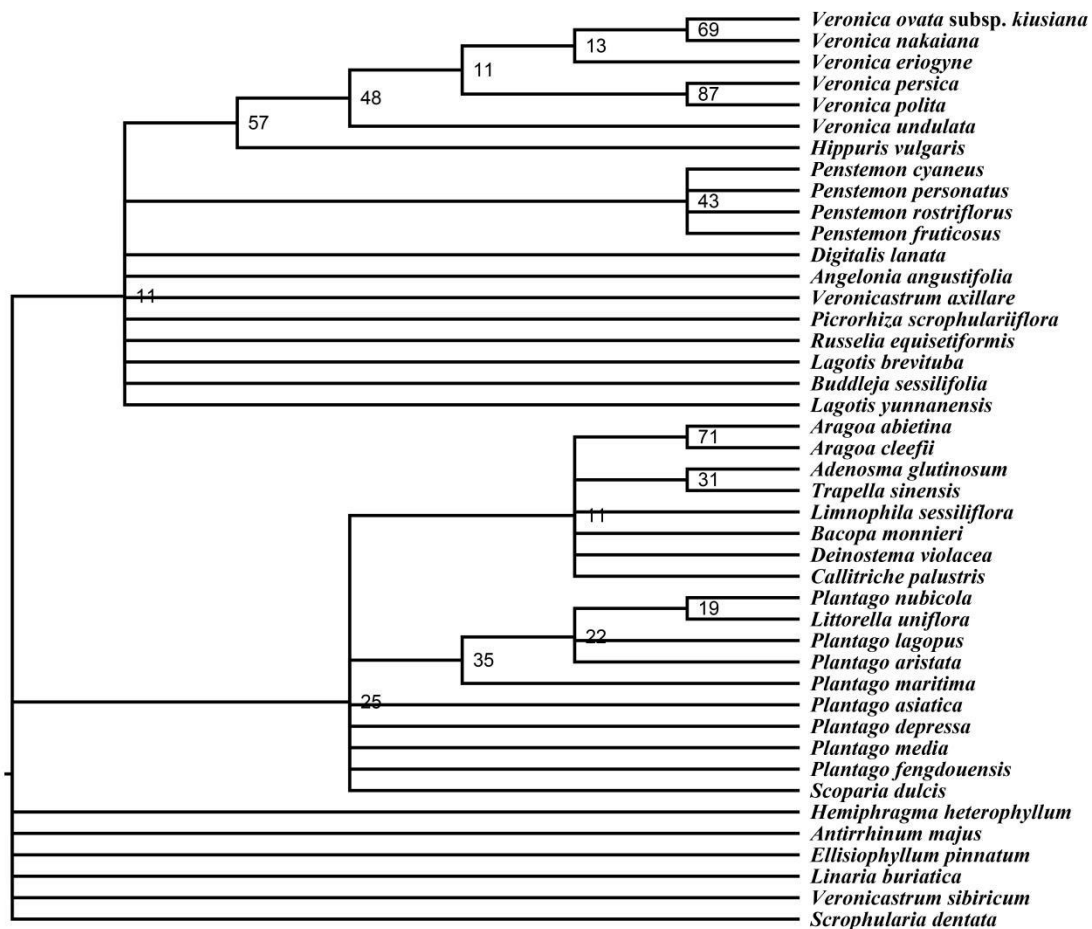

Maximum likelihood tree of Plantaginaceae based on **psbF** gene. Values at nodes represent the bootstrap support values. Nodes <10% bootstrap support were collapsed

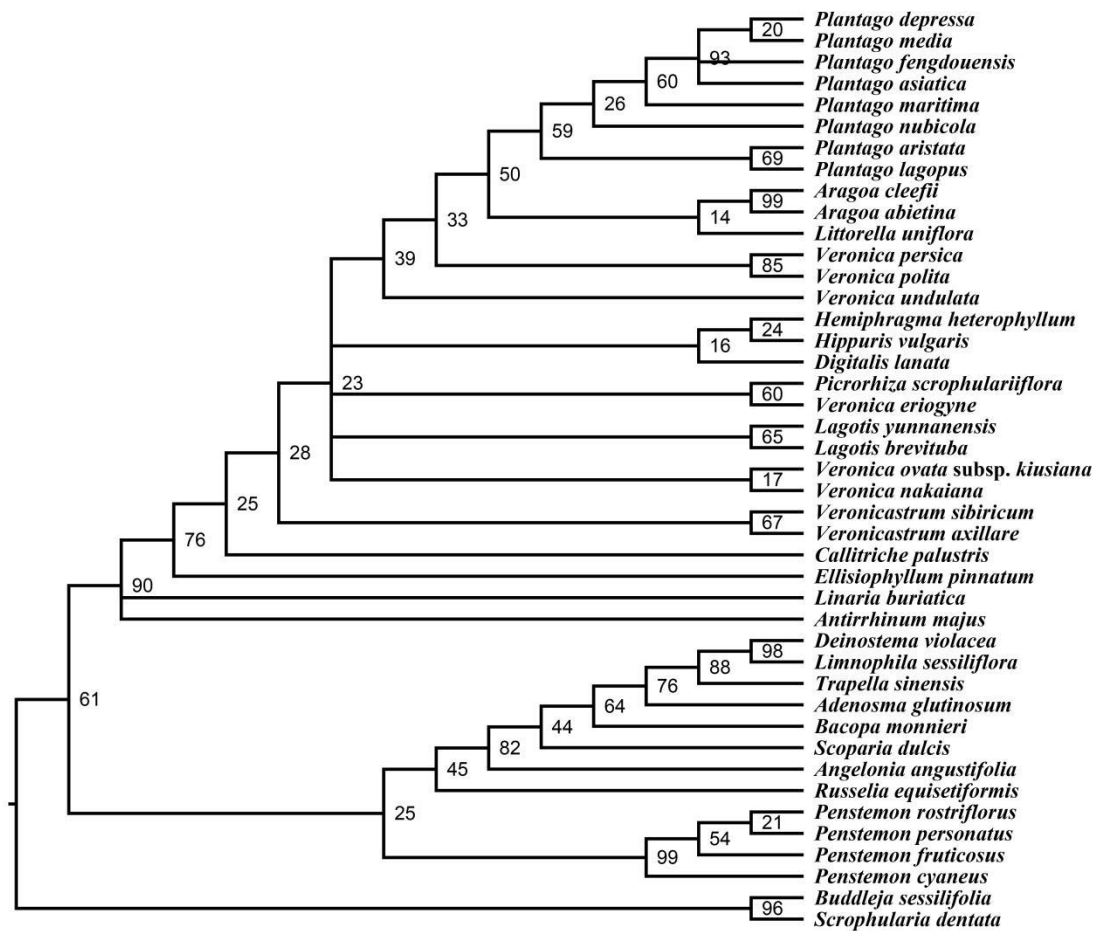

Maximum likelihood tree of Plantaginaceae based on **psbH** gene. Values at nodes represent the bootstrap support values. Nodes <10% bootstrap support were collapsed

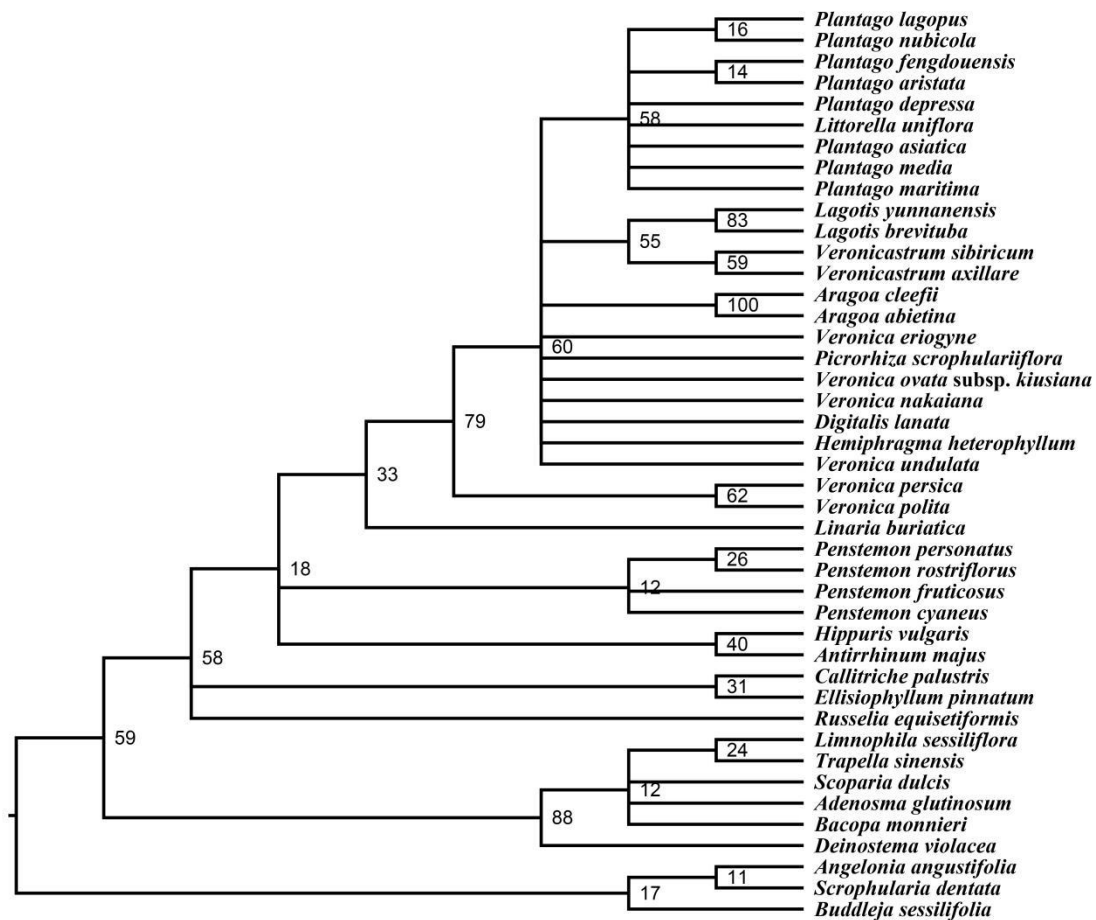

Maximum likelihood tree of Plantaginaceae based on *psbI* gene. Values at nodes represent the bootstrap support values. Nodes <10% bootstrap support were collapsed

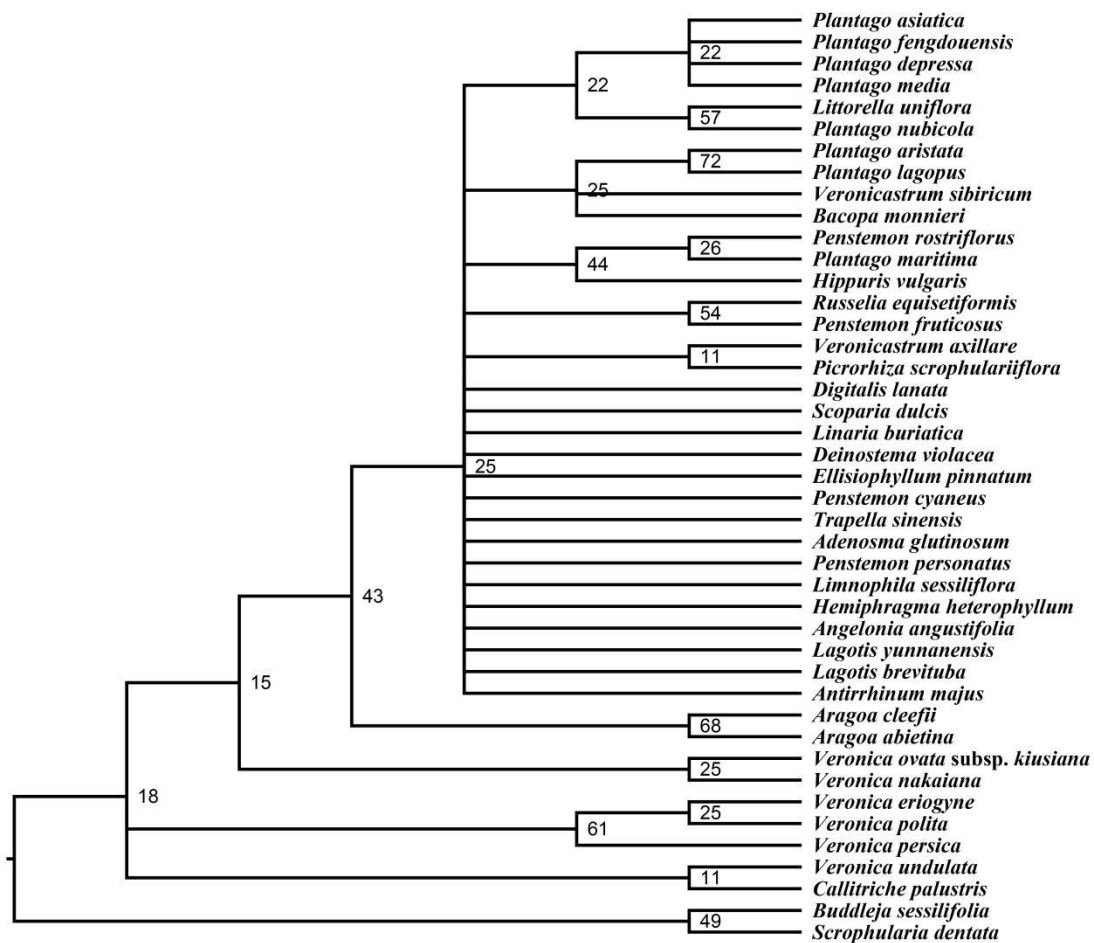

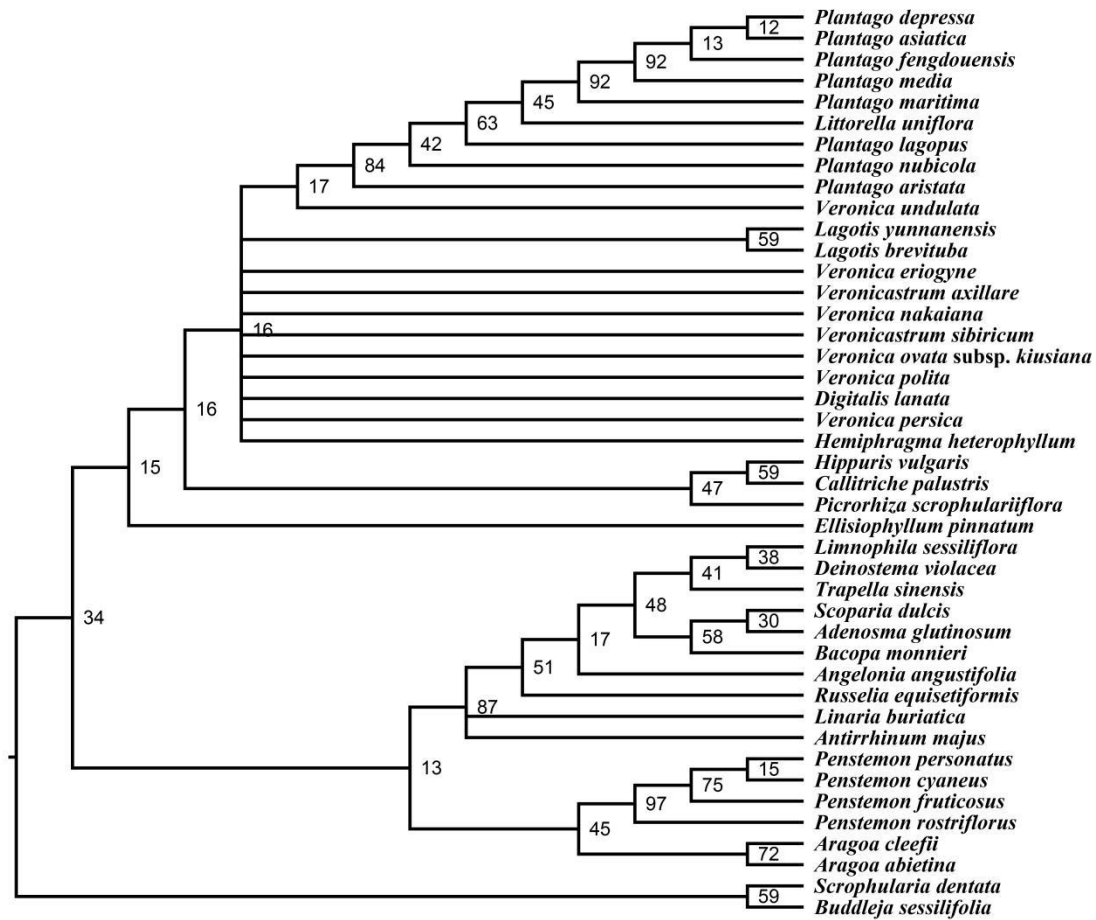

Maximum likelihood tree of Plantaginaceae based on *psbK* gene. Values at nodes represent the bootstrap support values. Nodes <10% bootstrap support were collapsed

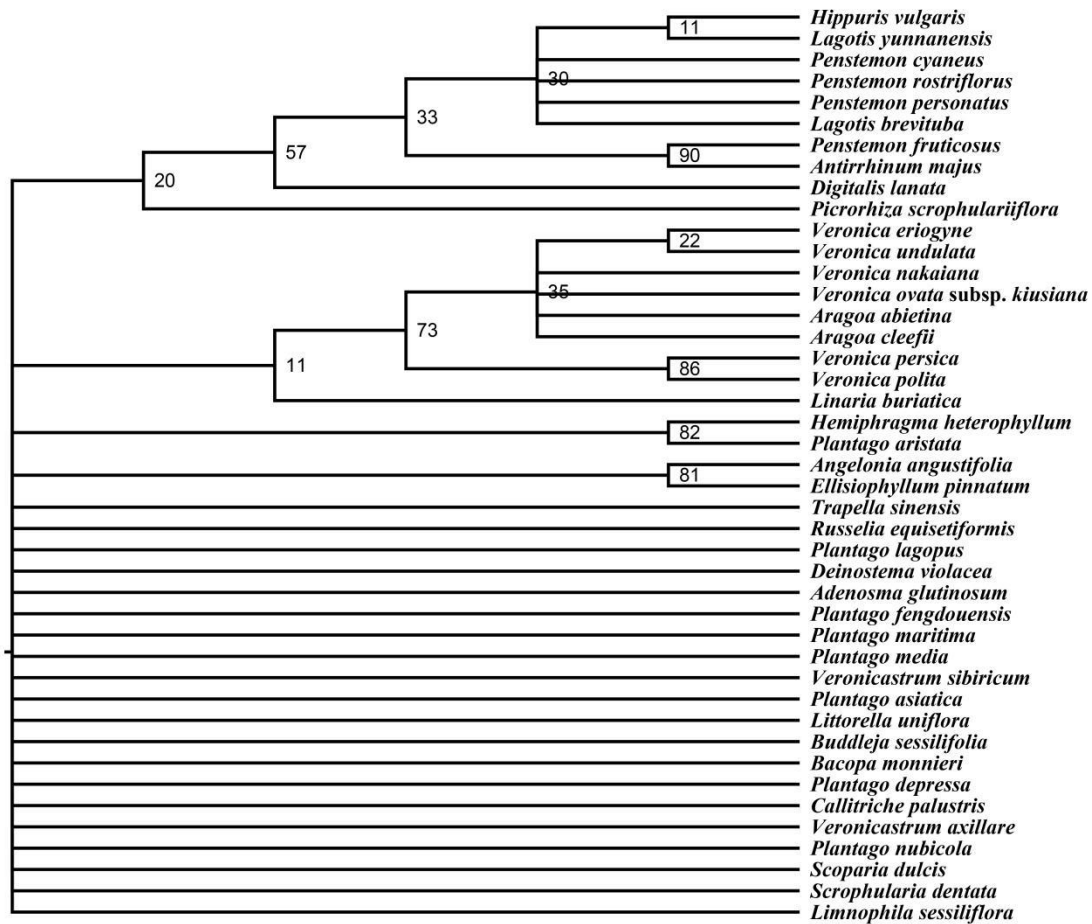

Maximum likelihood tree of Plantaginaceae based on **psbL** gene. Values at nodes represent the bootstrap support values. Nodes <10% bootstrap support were collapsed

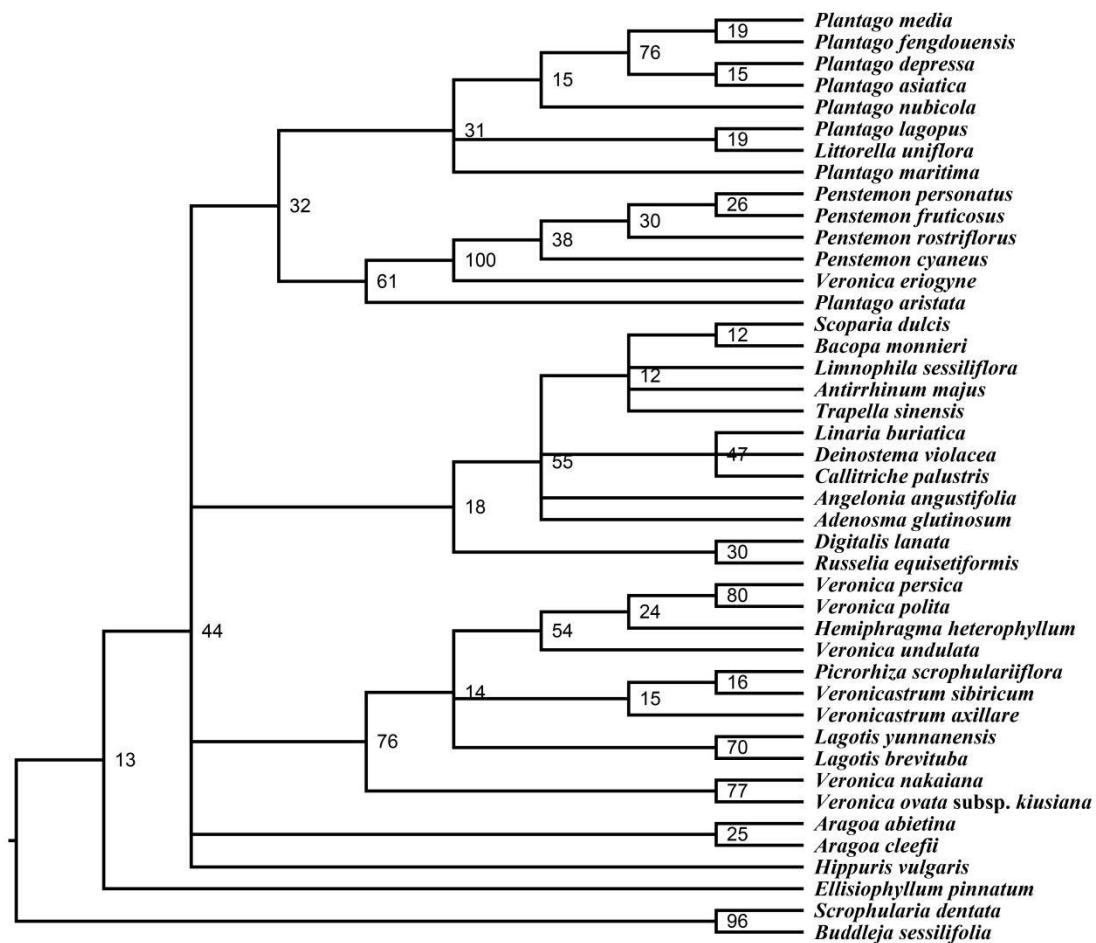

Maximum likelihood tree of Plantaginaceae based on **psbM** gene. Values at nodes represent the bootstrap support values. Nodes <10% bootstrap support were collapsed

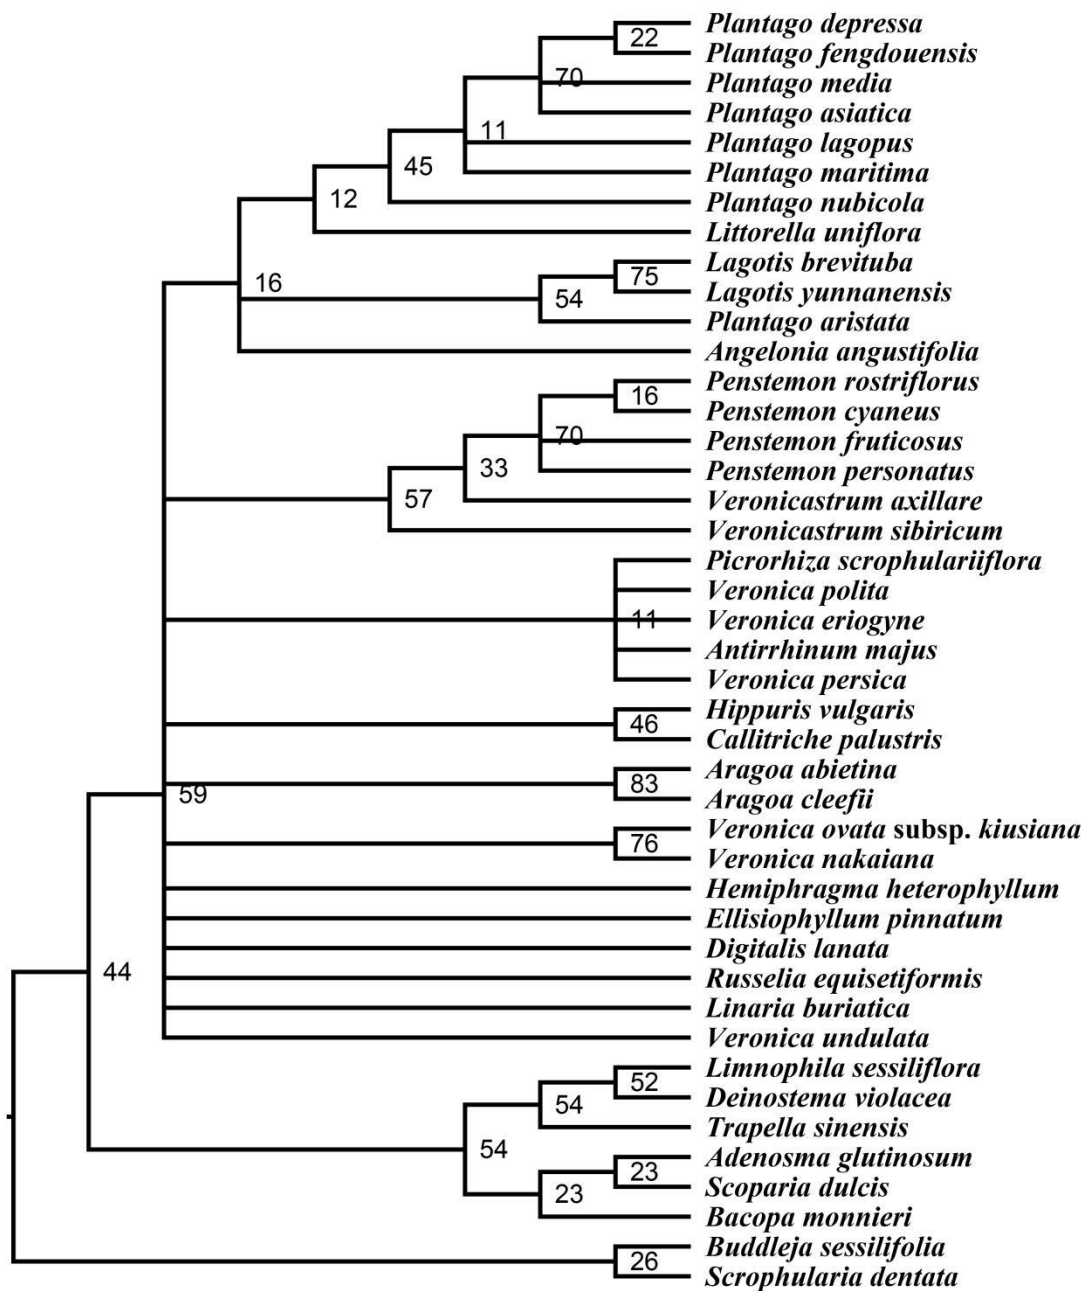



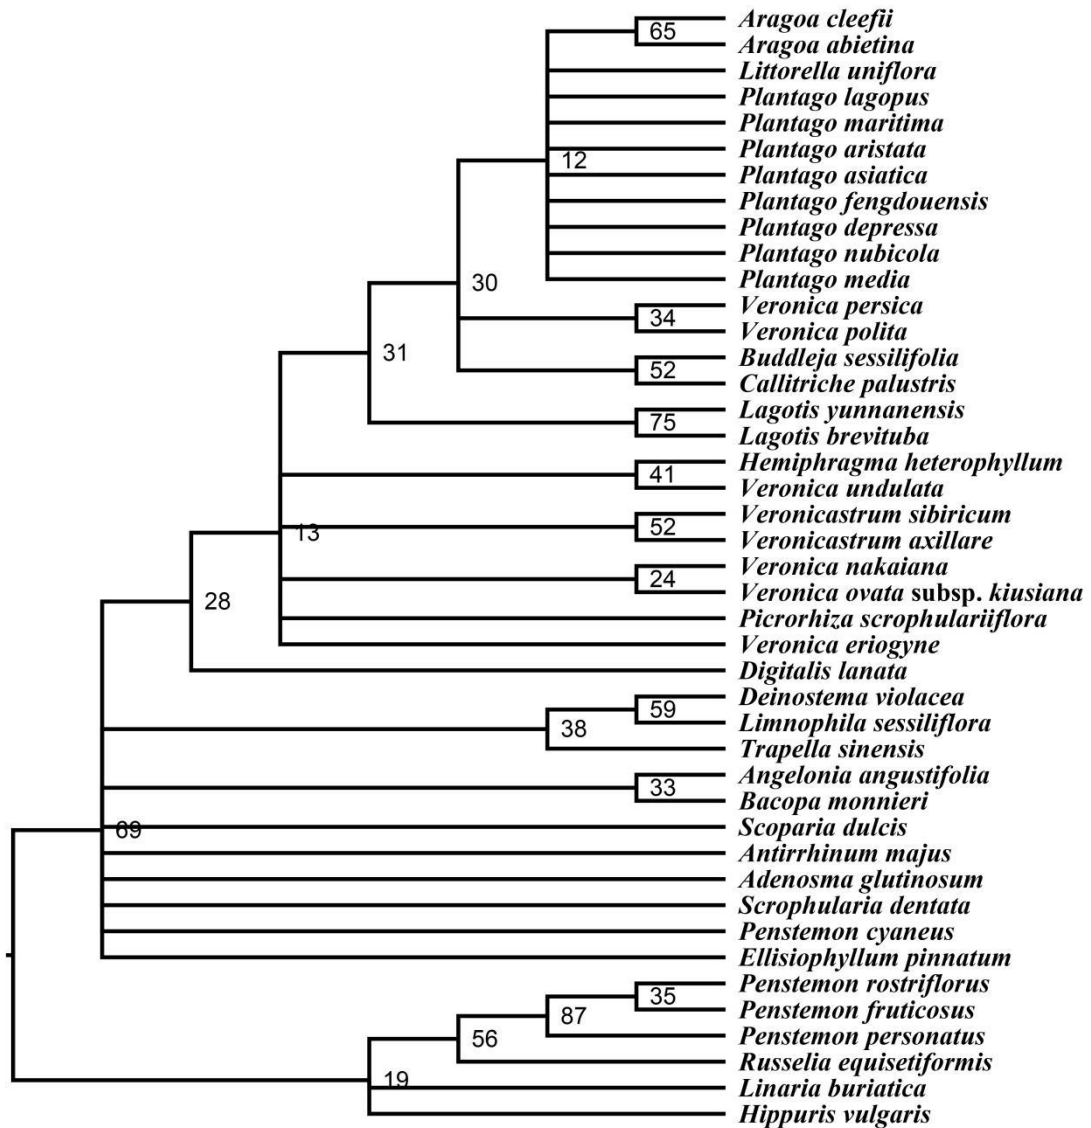

Maximum likelihood tree of Plantaginaceae based on **psbT** gene. Values at nodes represent the bootstrap support values. Nodes <10% bootstrap support were collapsed

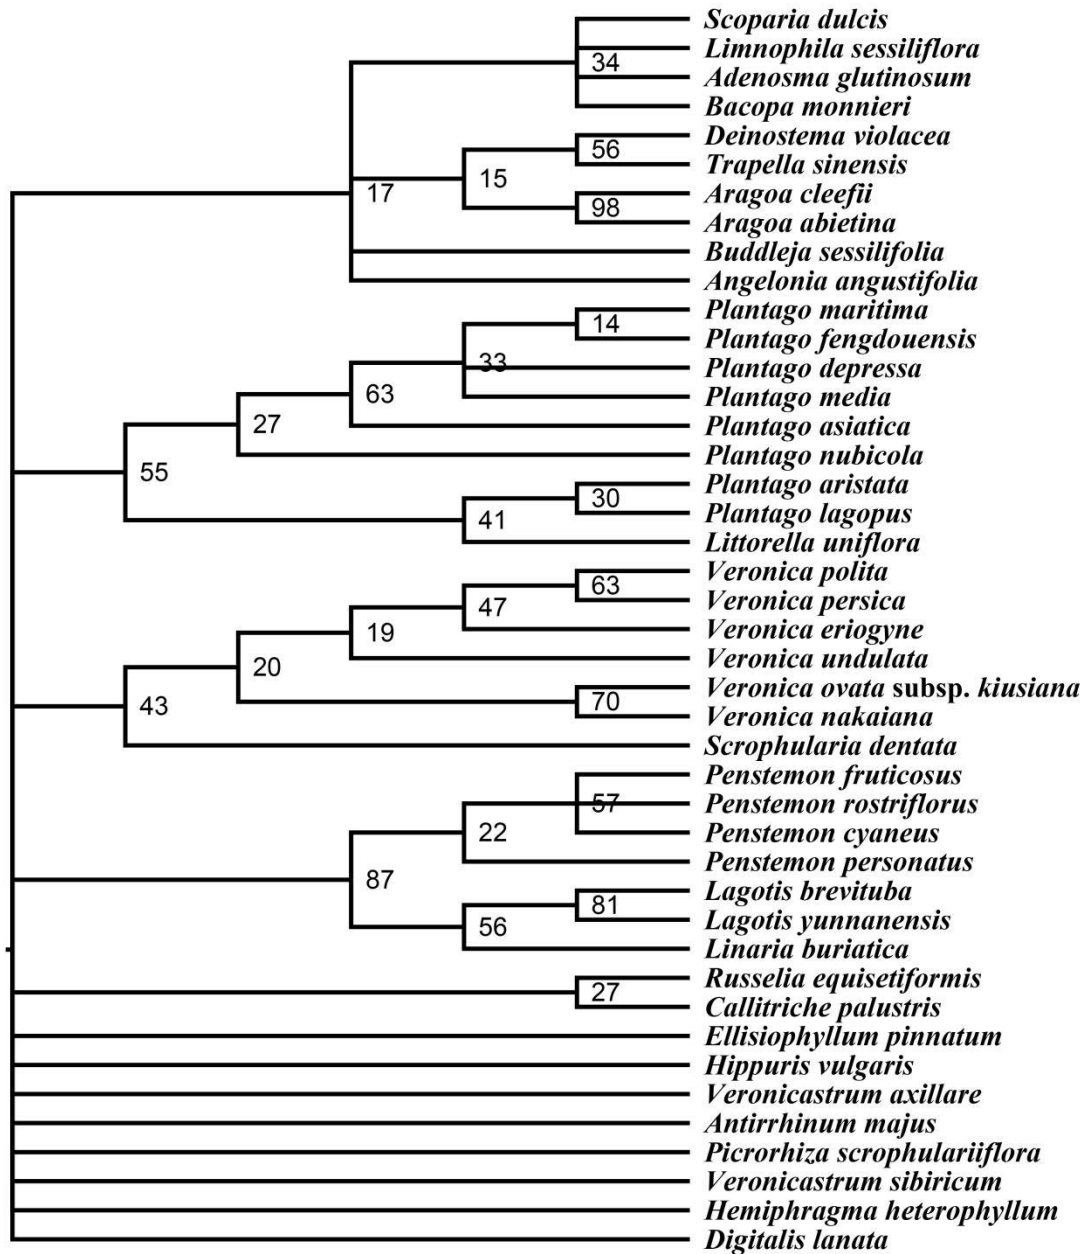

Maximum likelihood tree of Plantaginaceae based on **psbZ** gene. Values at nodes represent the bootstrap support values. Nodes <10% bootstrap support were collapsed

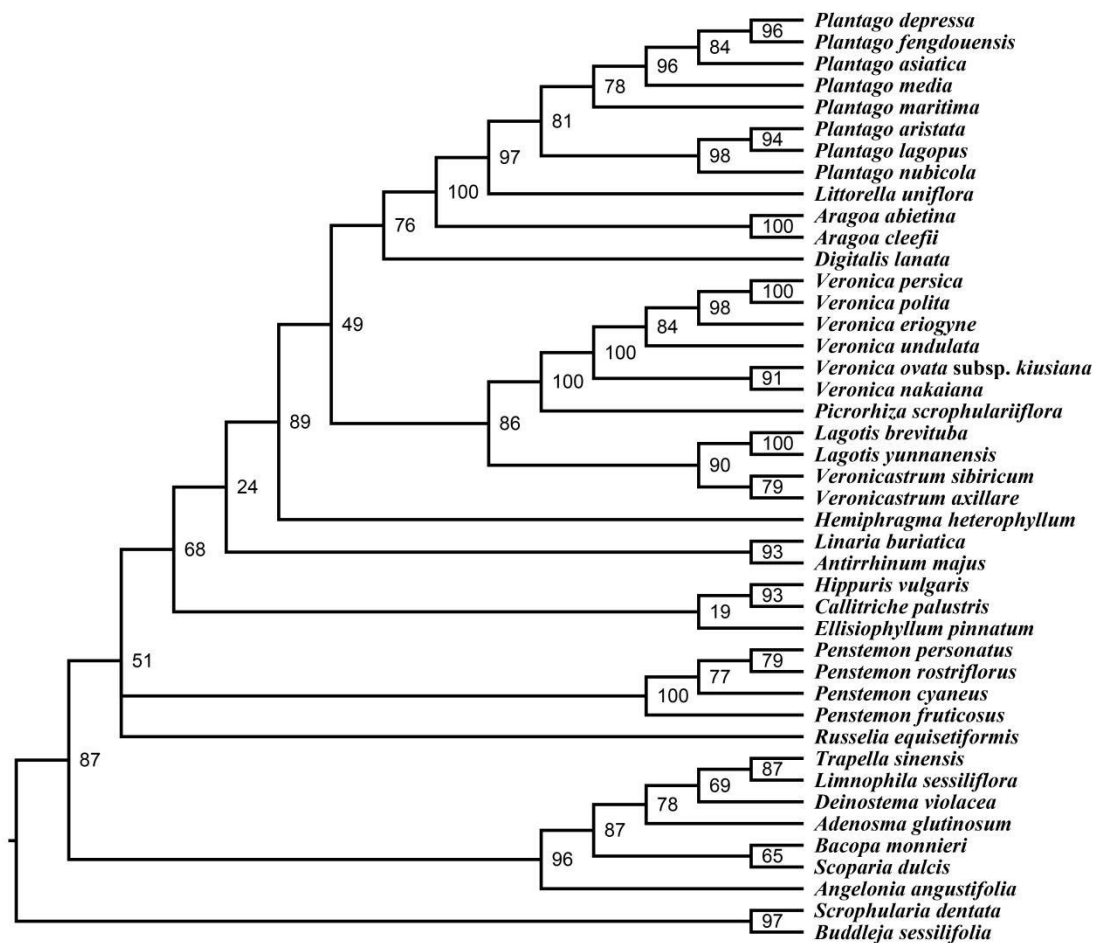

Maximum likelihood tree of Plantaginaceae based on **rbcL** gene. Values at nodes represent the bootstrap support values. Nodes <10% bootstrap support were collapsed

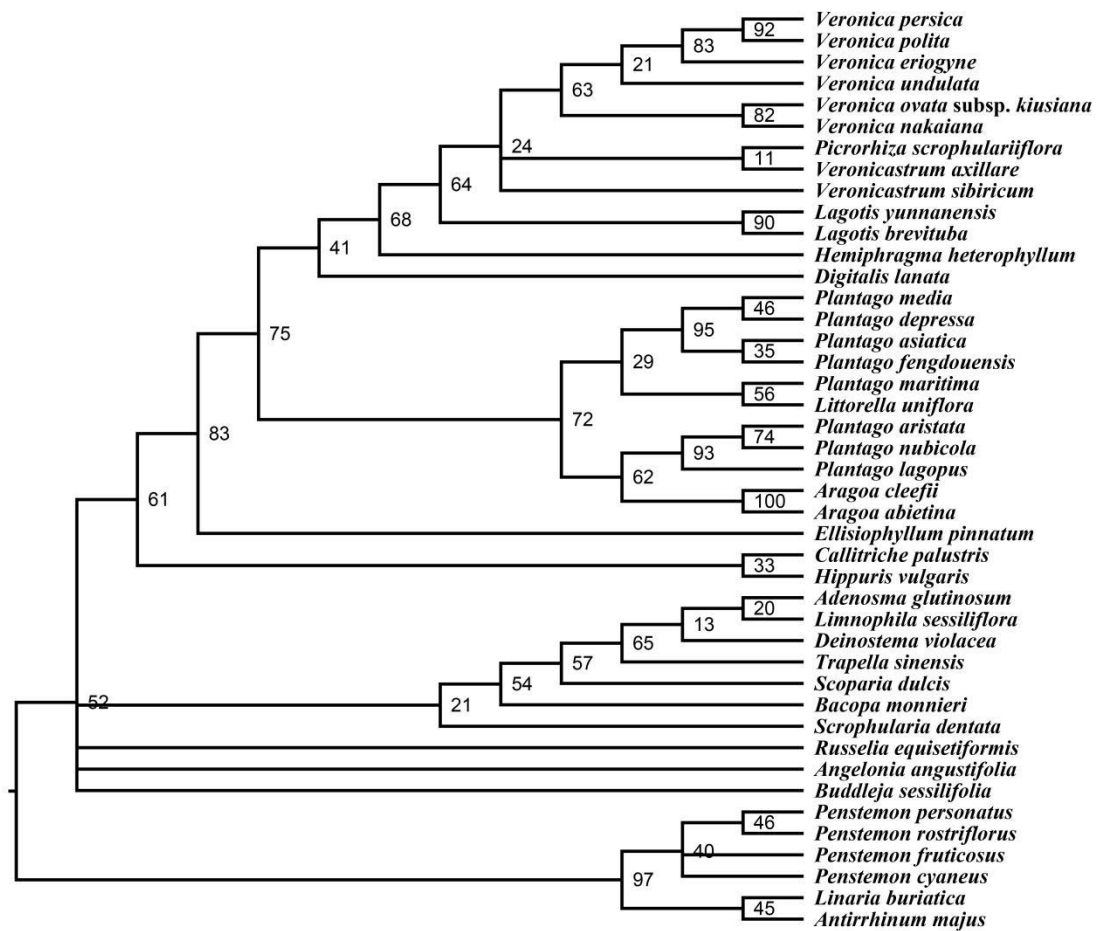

Maximum likelihood tree of Plantaginaceae based on *rpl2* gene. Values at nodes represent the bootstrap support values. Nodes <10% bootstrap support were collapsed

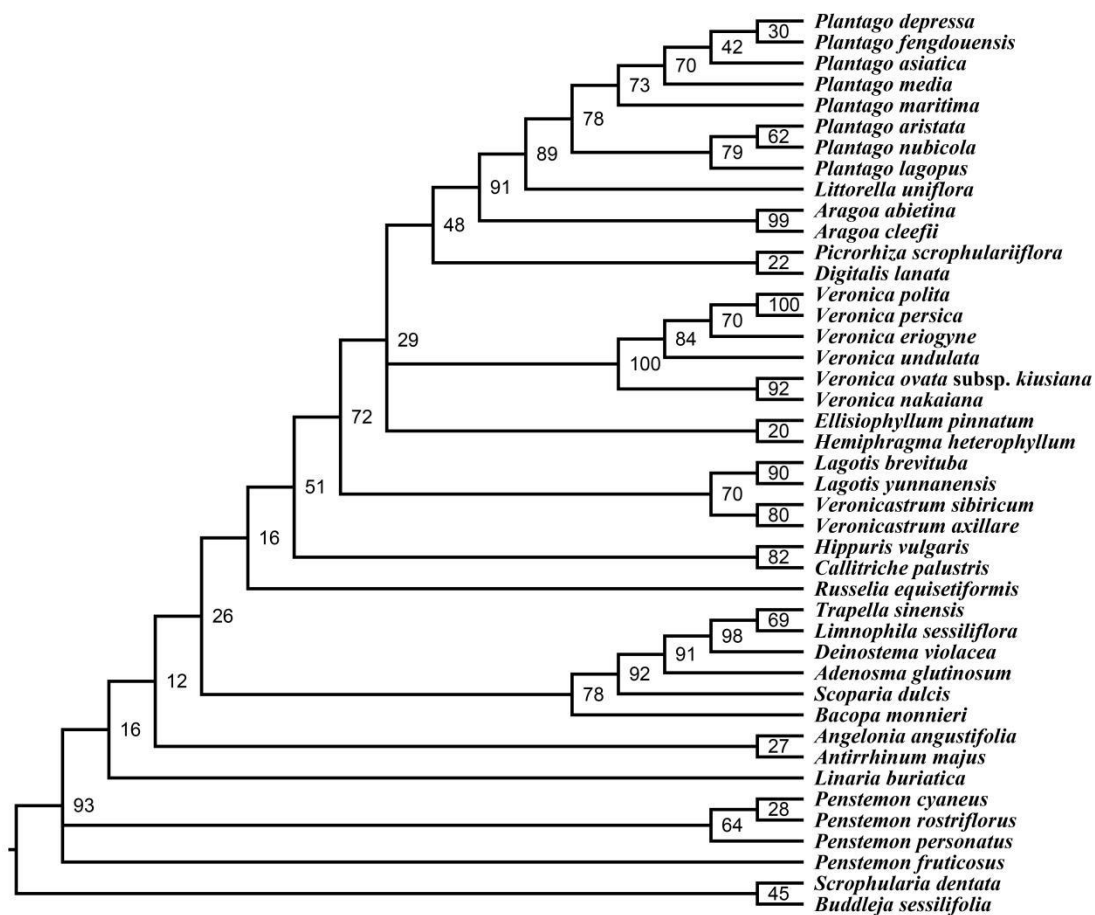

Maximum likelihood tree of Plantaginaceae based on *rpl14* gene. Values at nodes represent the bootstrap support values. Nodes <10% bootstrap support were collapsed

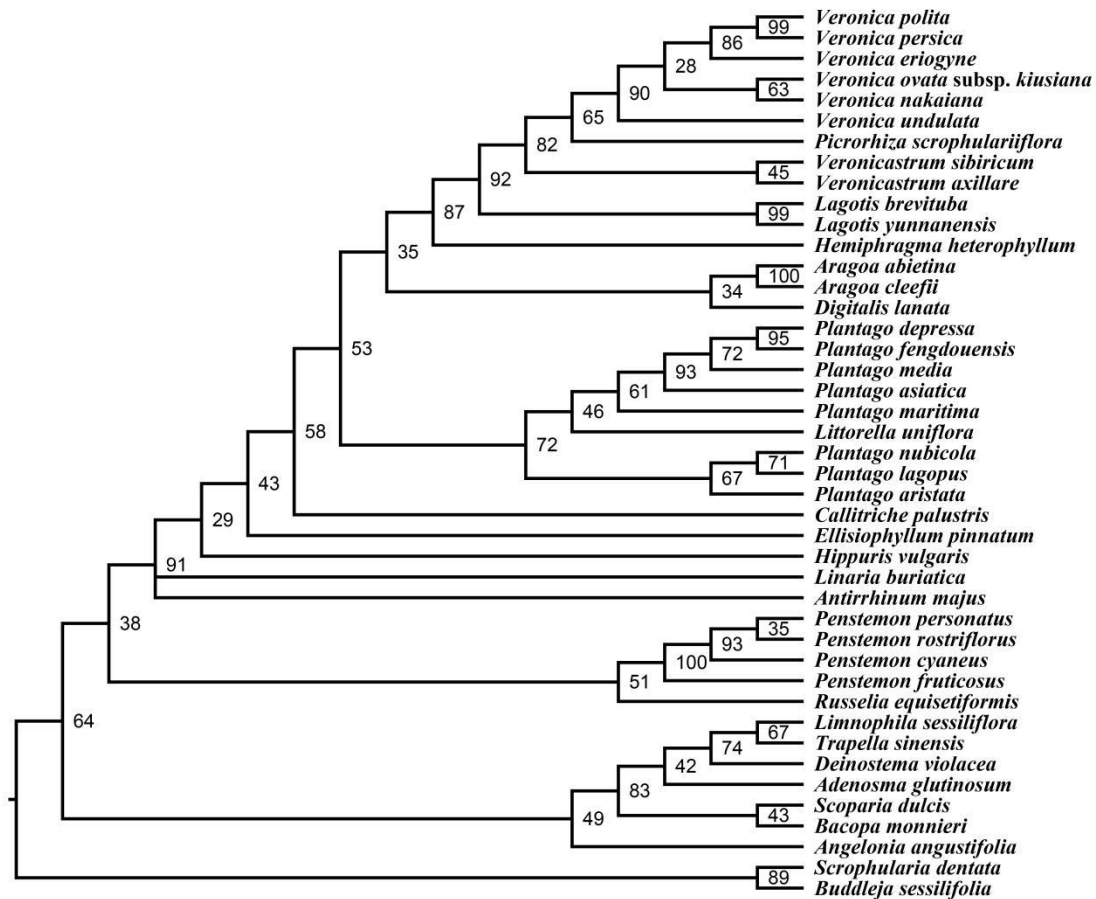

Maximum likelihood tree of Plantaginaceae based on **rpl16** gene. Values at nodes represent the bootstrap support values. Nodes <10% bootstrap support were collapsed

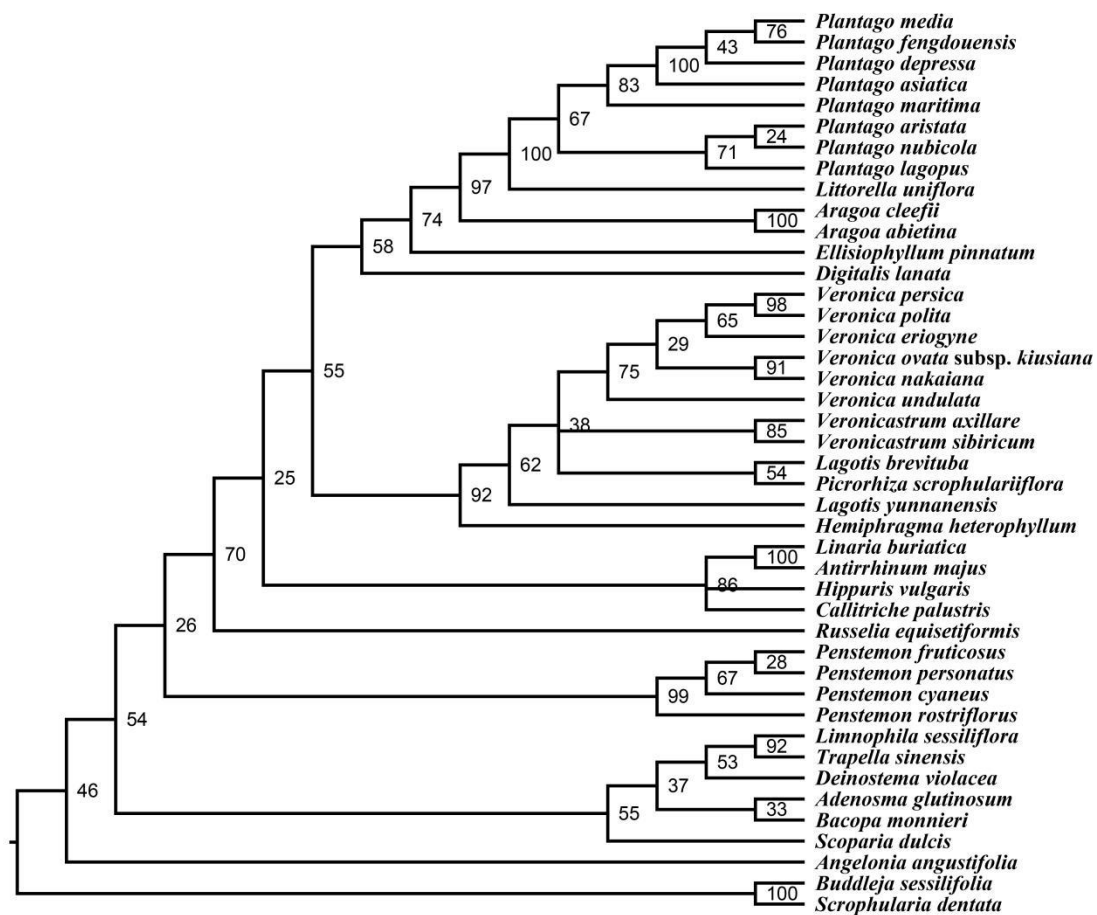

Maximum likelihood tree of Plantaginaceae based on *rpl20* gene. Values at nodes represent the bootstrap support values. Nodes <10% bootstrap support were collapsed

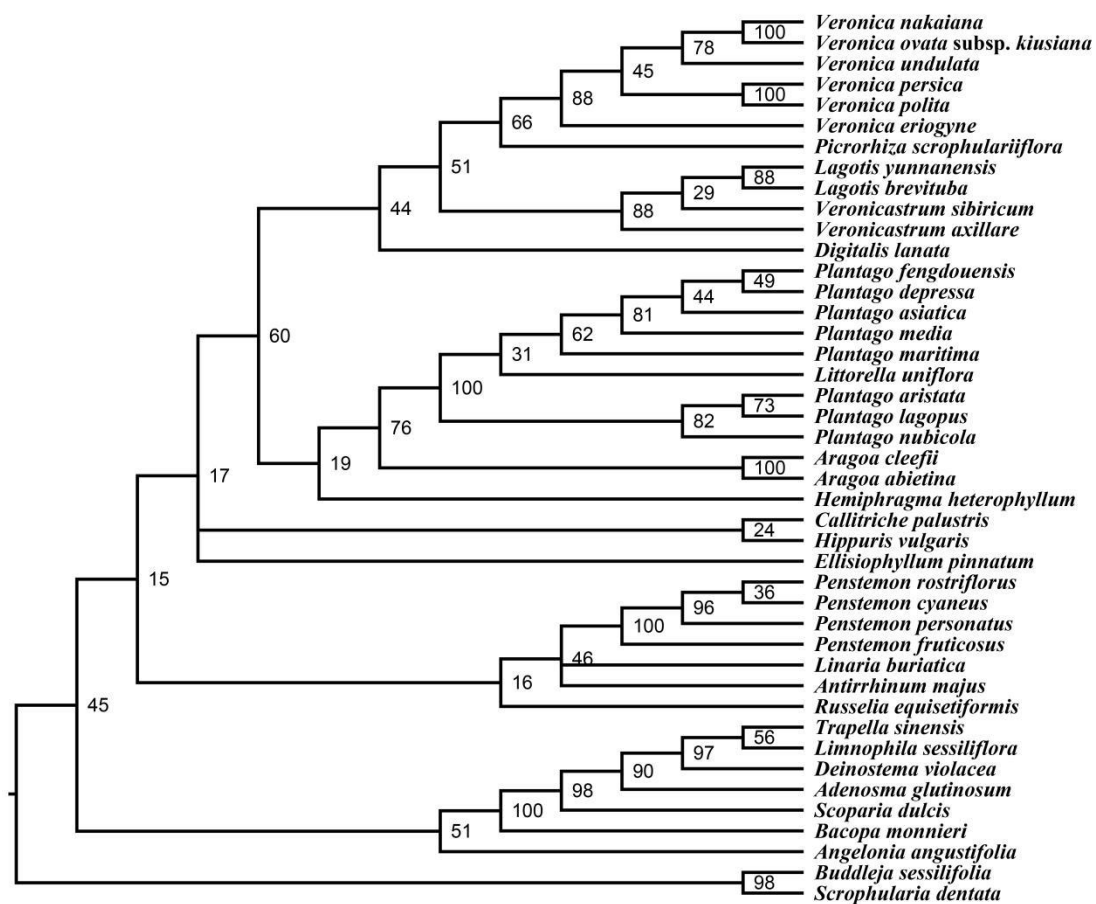

Maximum likelihood tree of Plantaginaceae based on *rpl22* gene. Values at nodes represent the bootstrap support values. Nodes <10% bootstrap support were collapsed



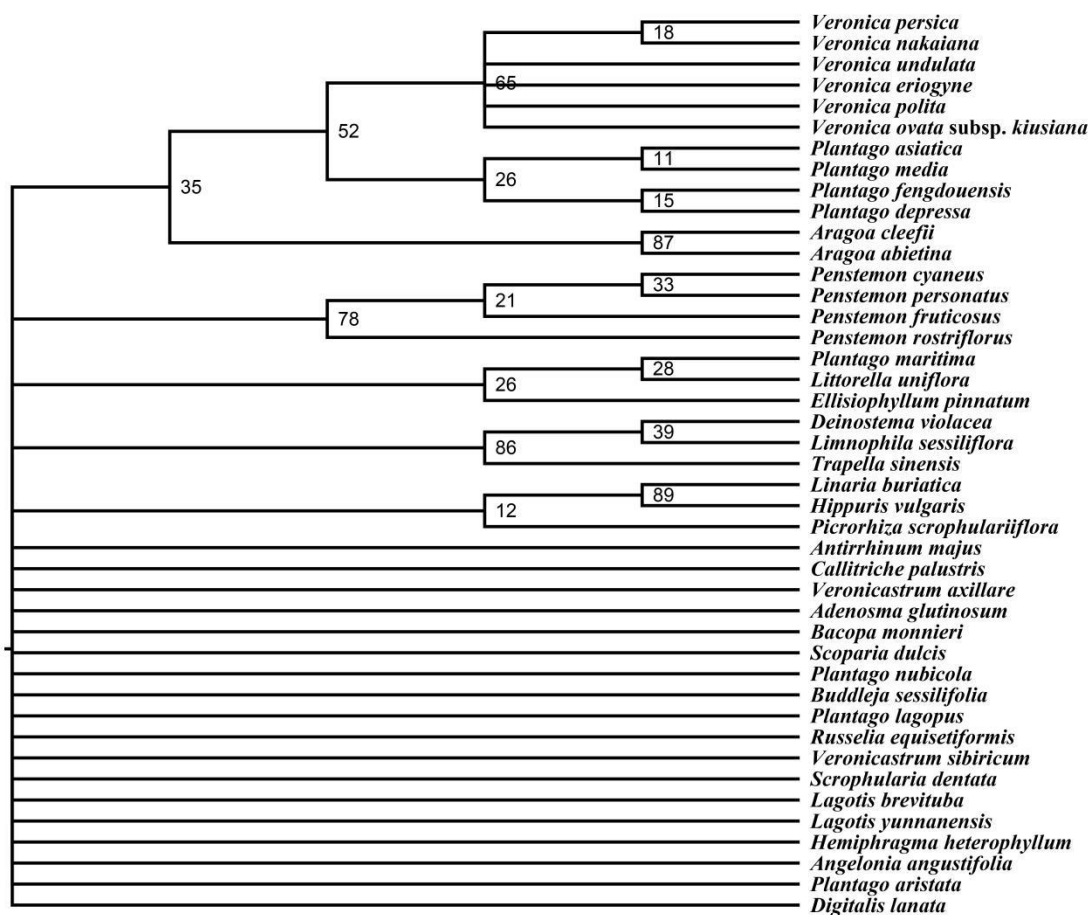

Maximum likelihood tree of Plantaginaceae based on *rpl23* gene. Values at nodes represent the bootstrap support values. Nodes <10% bootstrap support were collapsed

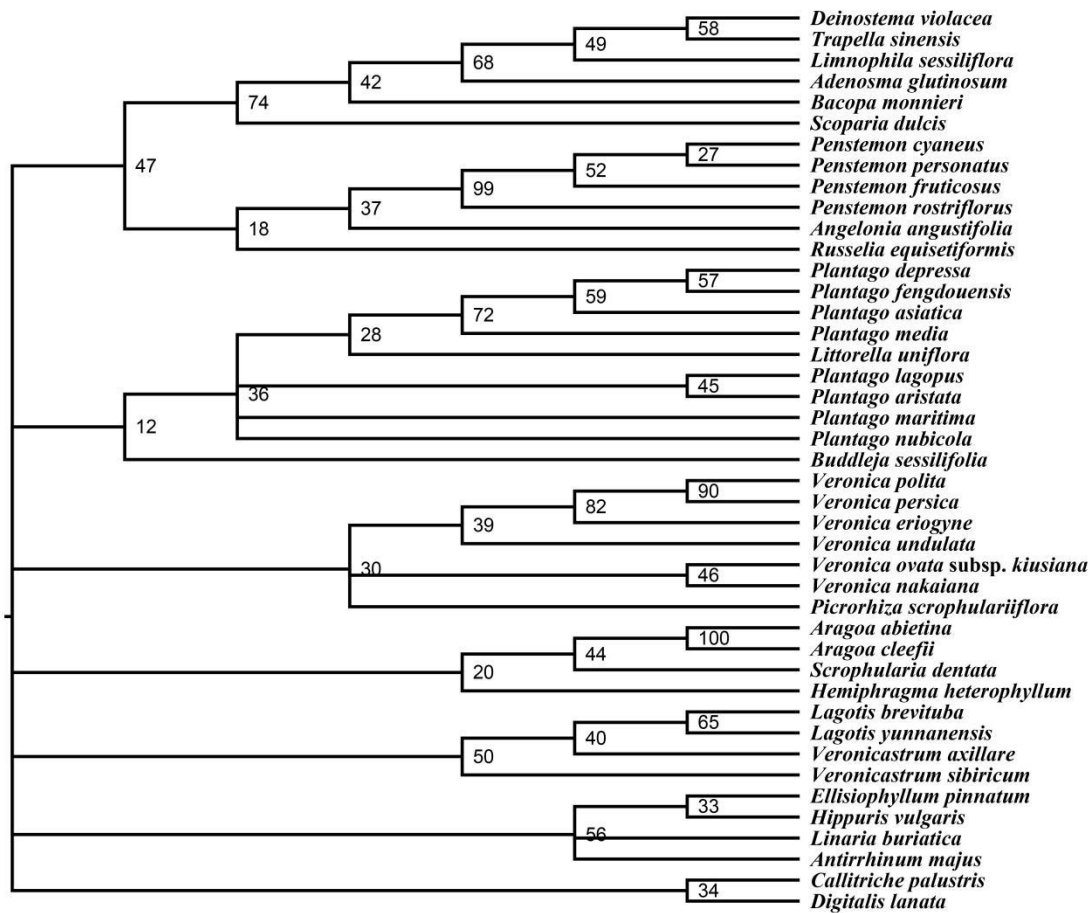

Maximum likelihood tree of Plantaginaceae based on *rpl32* gene. Values at nodes represent the bootstrap support values. Nodes <10% bootstrap support were collapsed

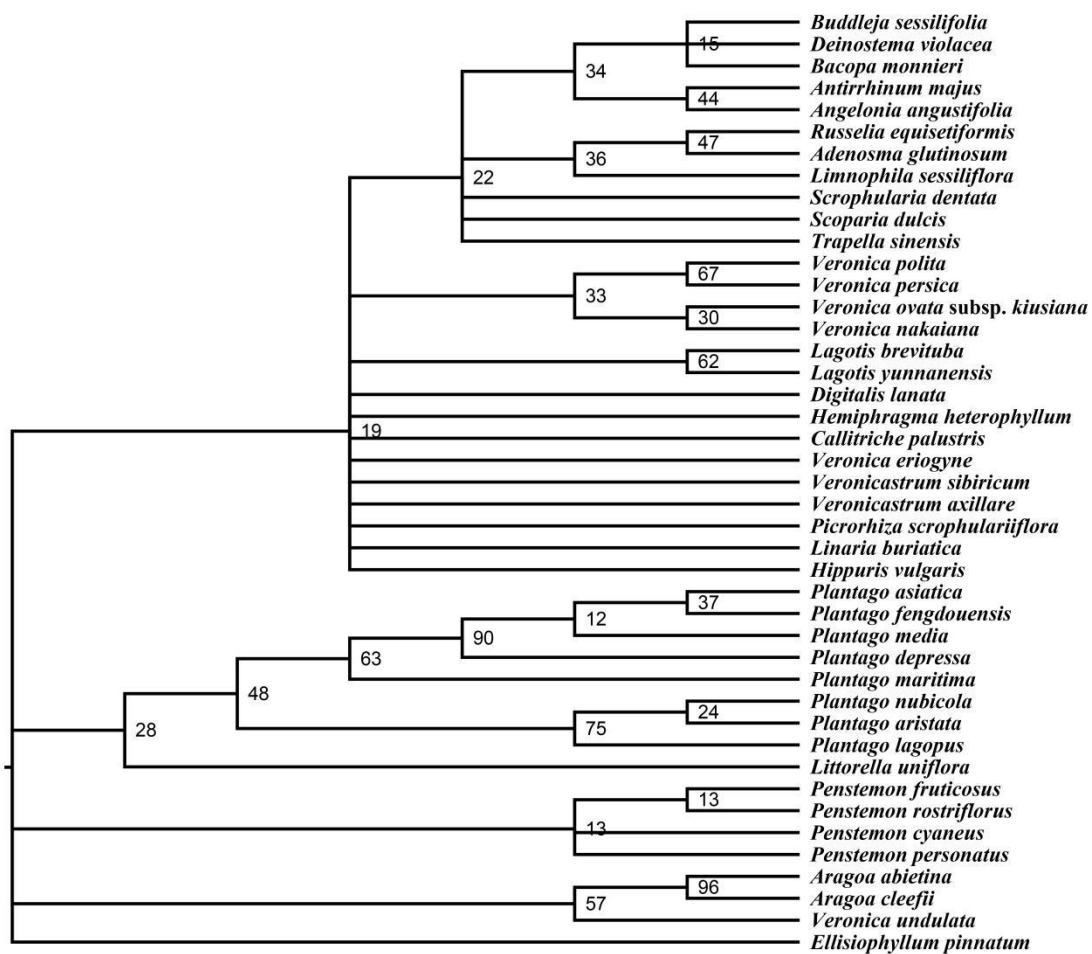

Maximum likelihood tree of Plantaginaceae based on **rpl33** gene. Values at nodes represent the bootstrap support values. Nodes <10% bootstrap support were collapsed

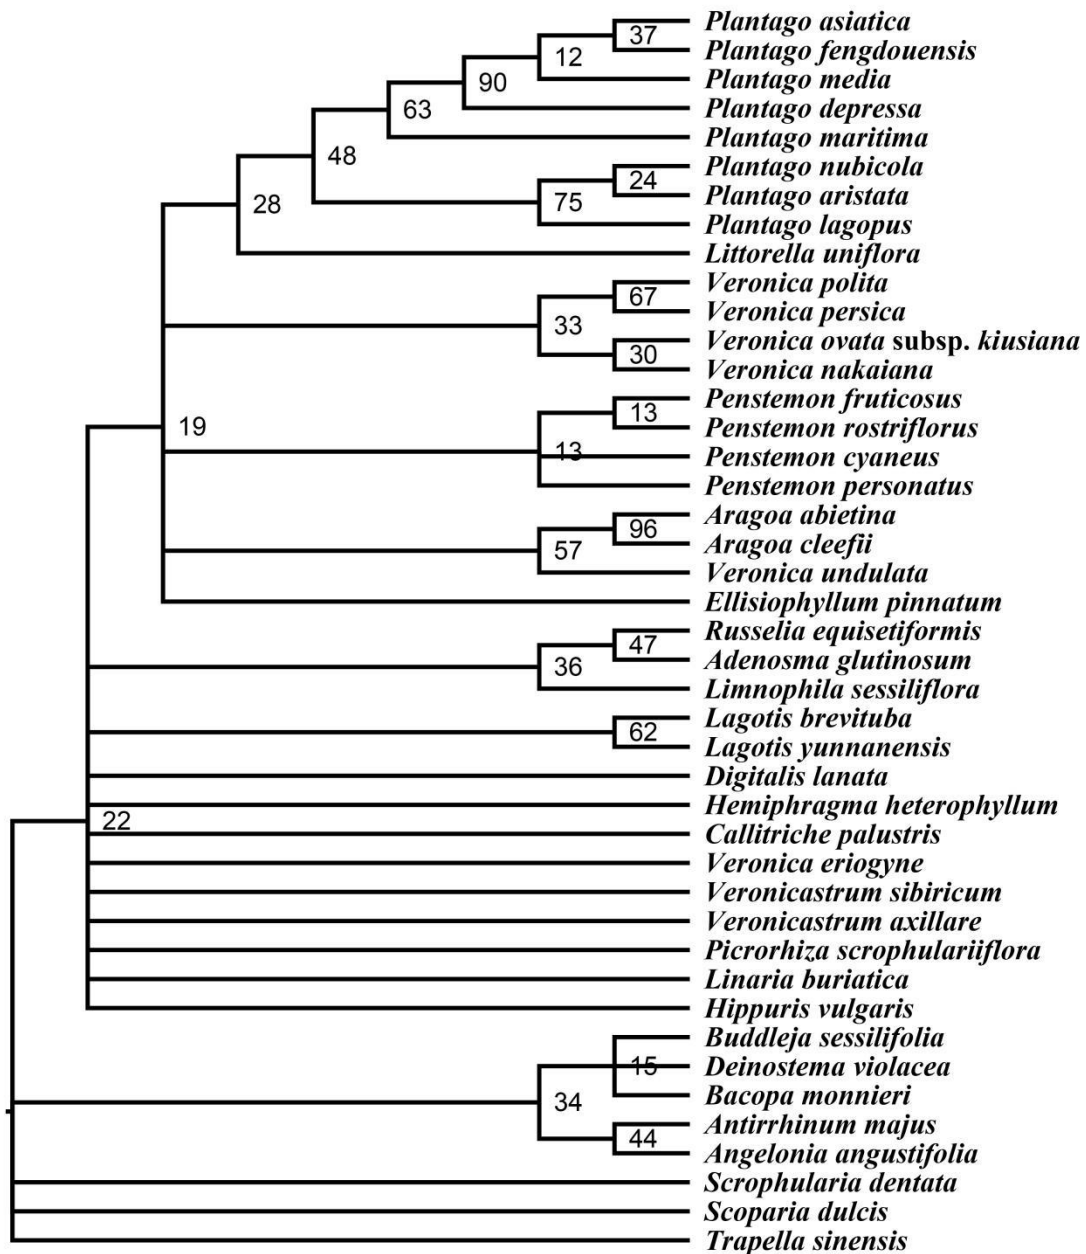

Maximum likelihood tree of Plantaginaceae based on *rpl36* gene. Values at nodes represent the bootstrap support values. Nodes <10% bootstrap support were collapsed

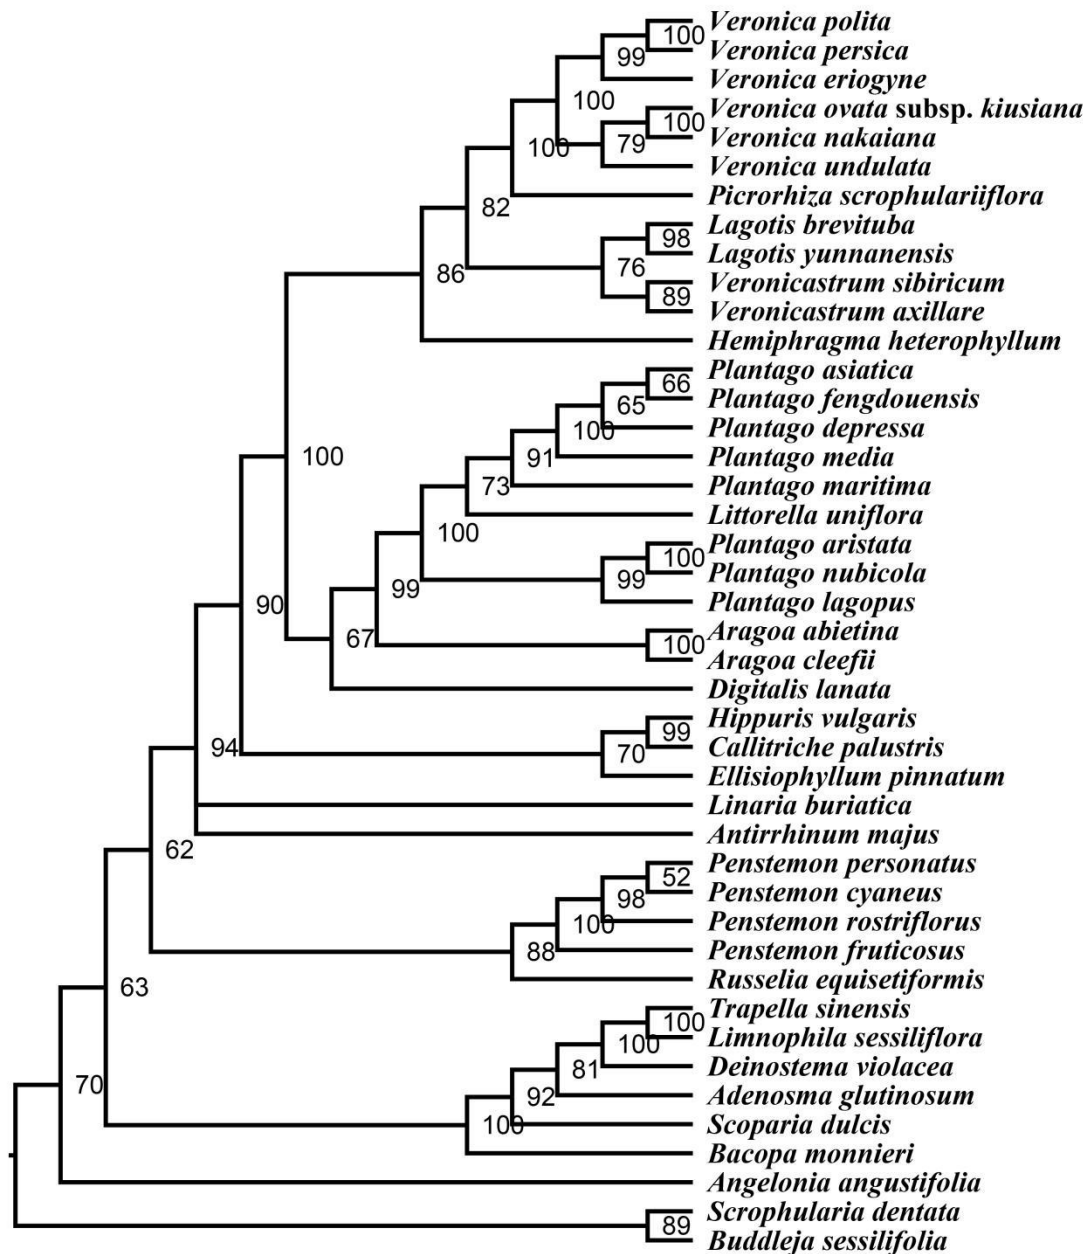

Maximum likelihood tree of Plantaginaceae based on *rpoA* gene. Values at nodes represent the bootstrap support values. Nodes <10% bootstrap support were collapsed

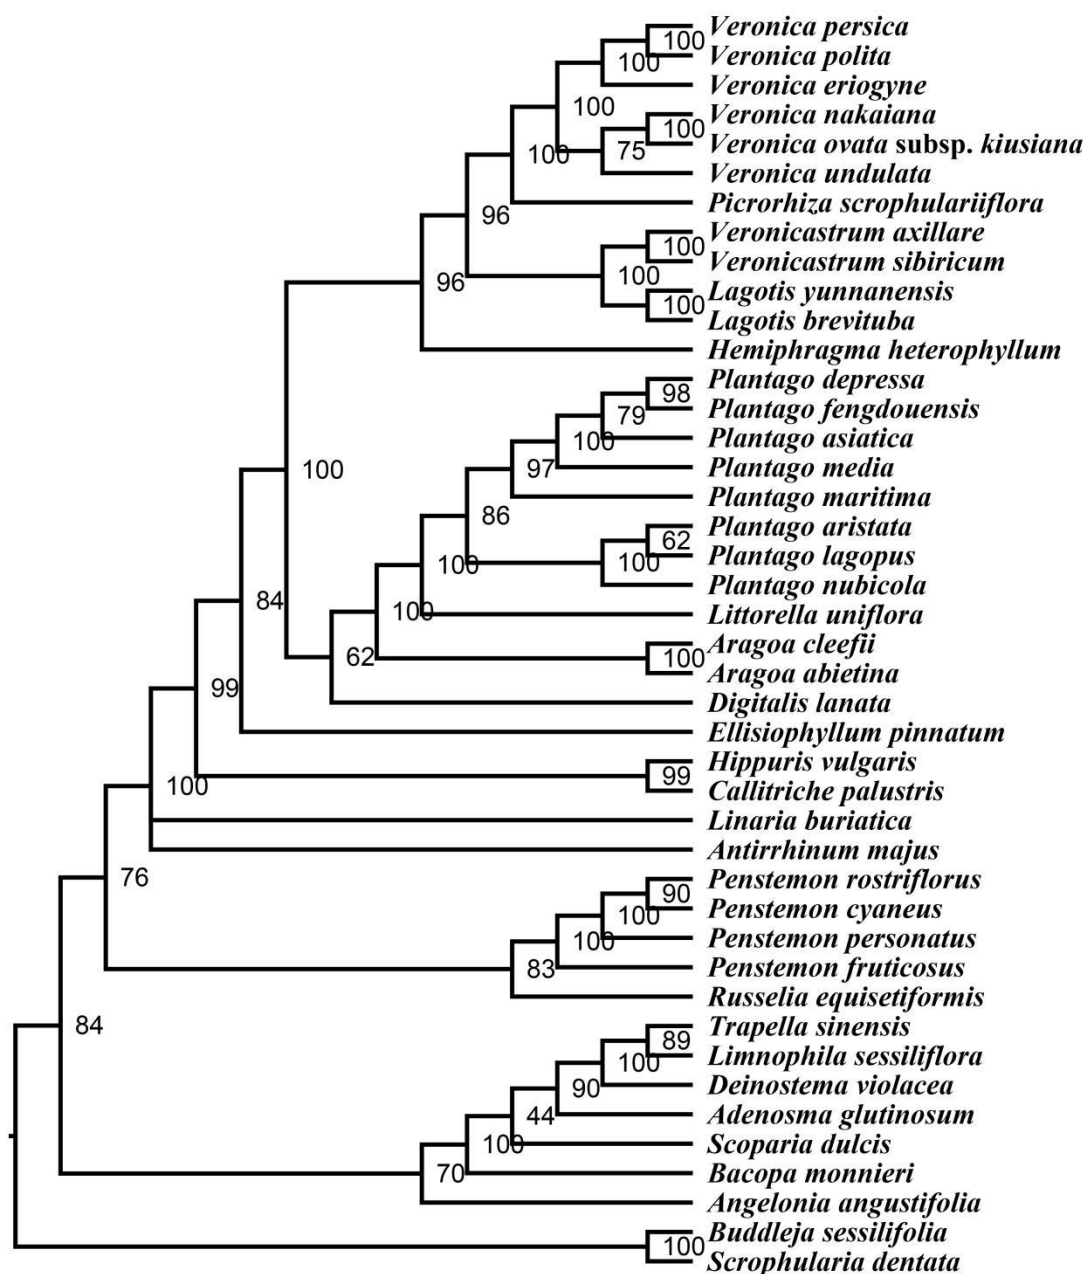

Maximum likelihood tree of Plantaginaceae based on **rpoB** gene. Values at nodes represent the bootstrap support values. Nodes <10% bootstrap support were collapsed

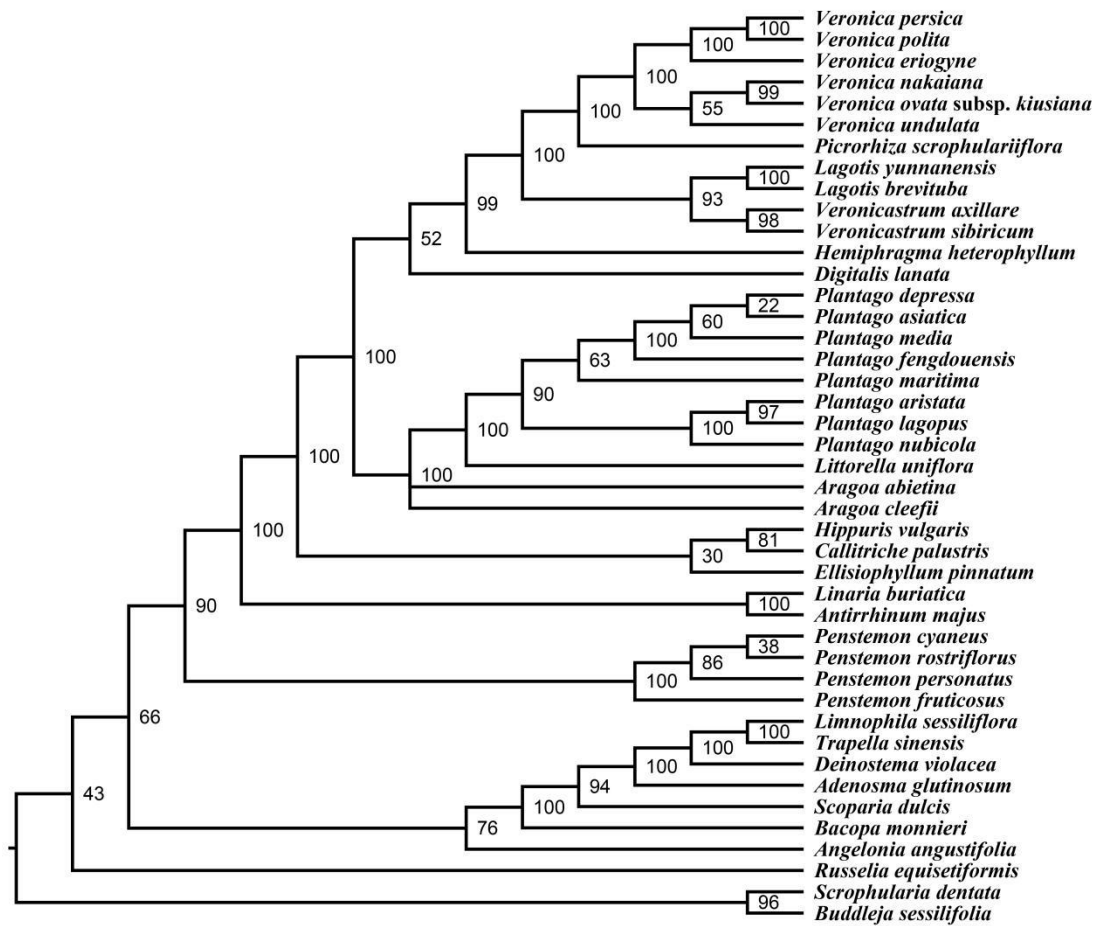

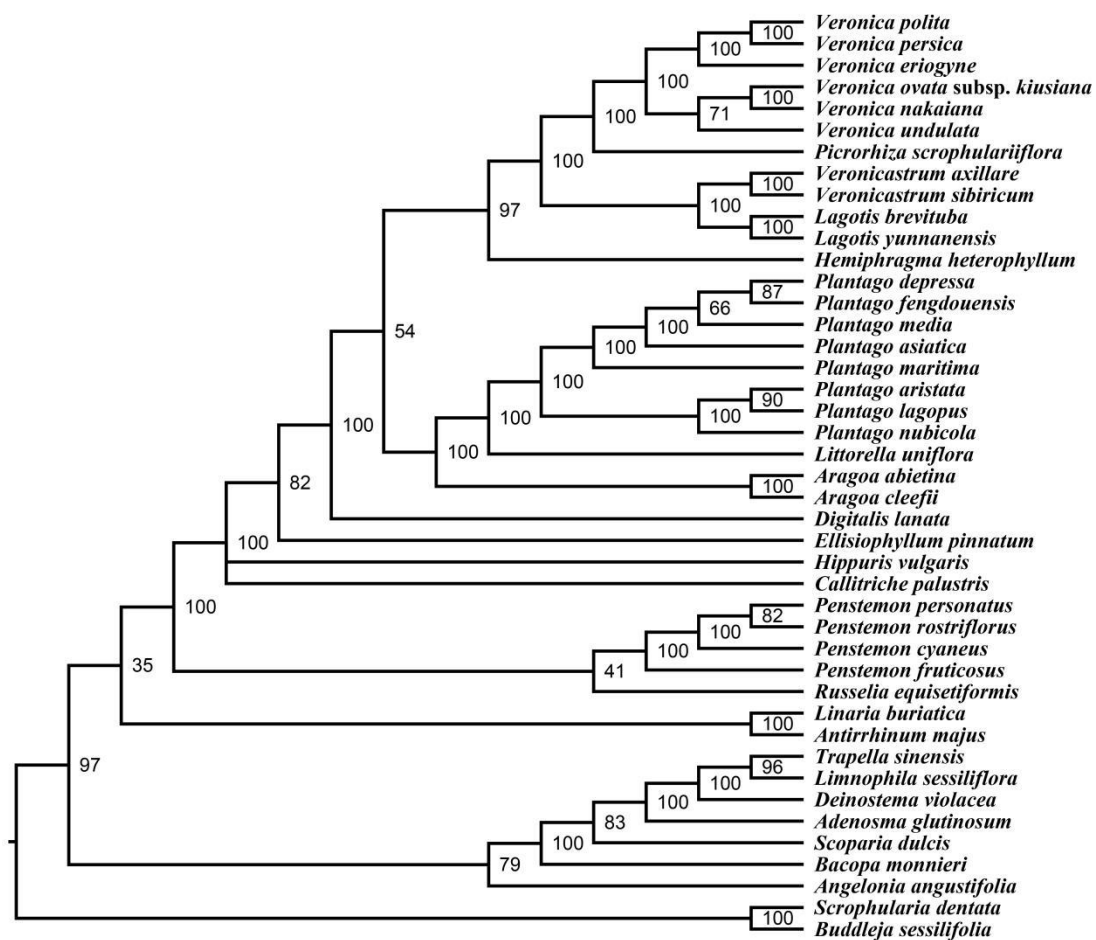

Maximum likelihood tree of Plantaginaceae based on **rpoC2** gene. Values at nodes represent the bootstrap support values. Nodes <10% bootstrap support were collapsed



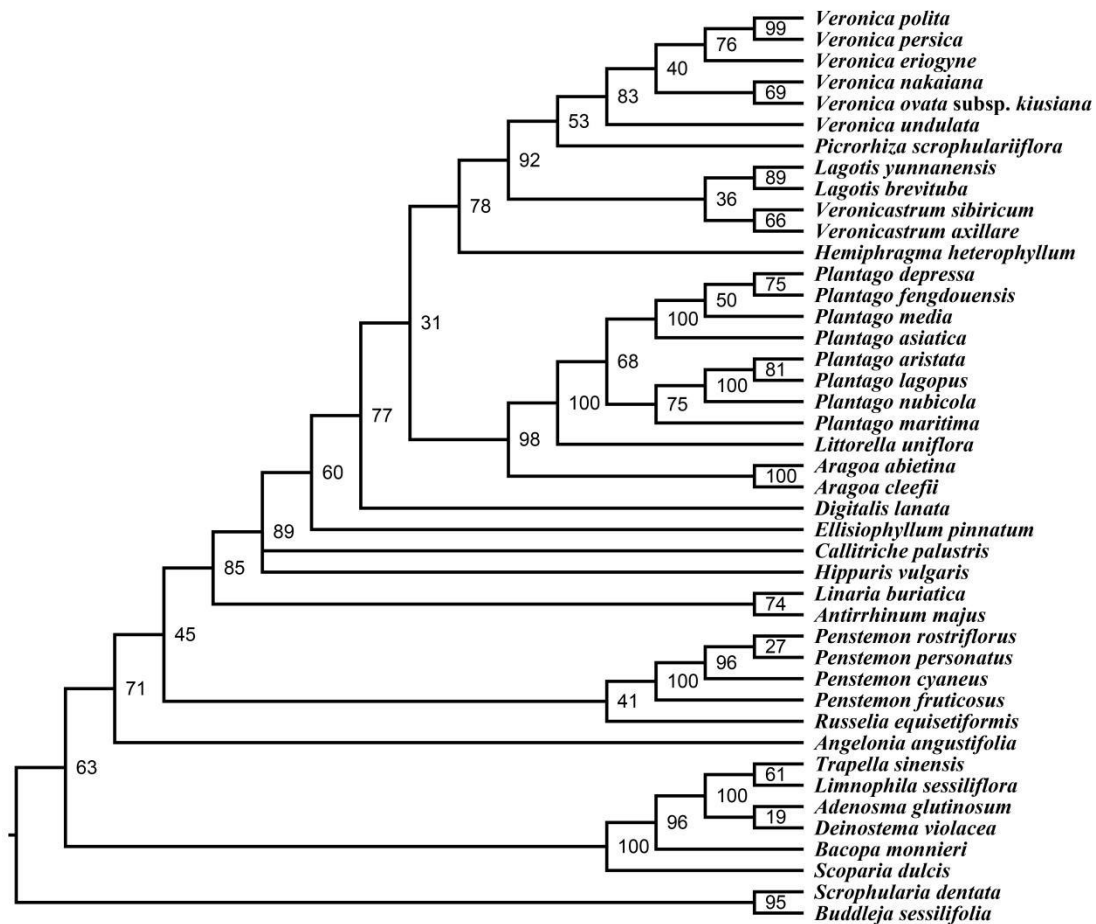

Maximum likelihood tree of Plantaginaceae based on **rps2** gene. Values at nodes represent the bootstrap support values. Nodes <10% bootstrap support were collapsed

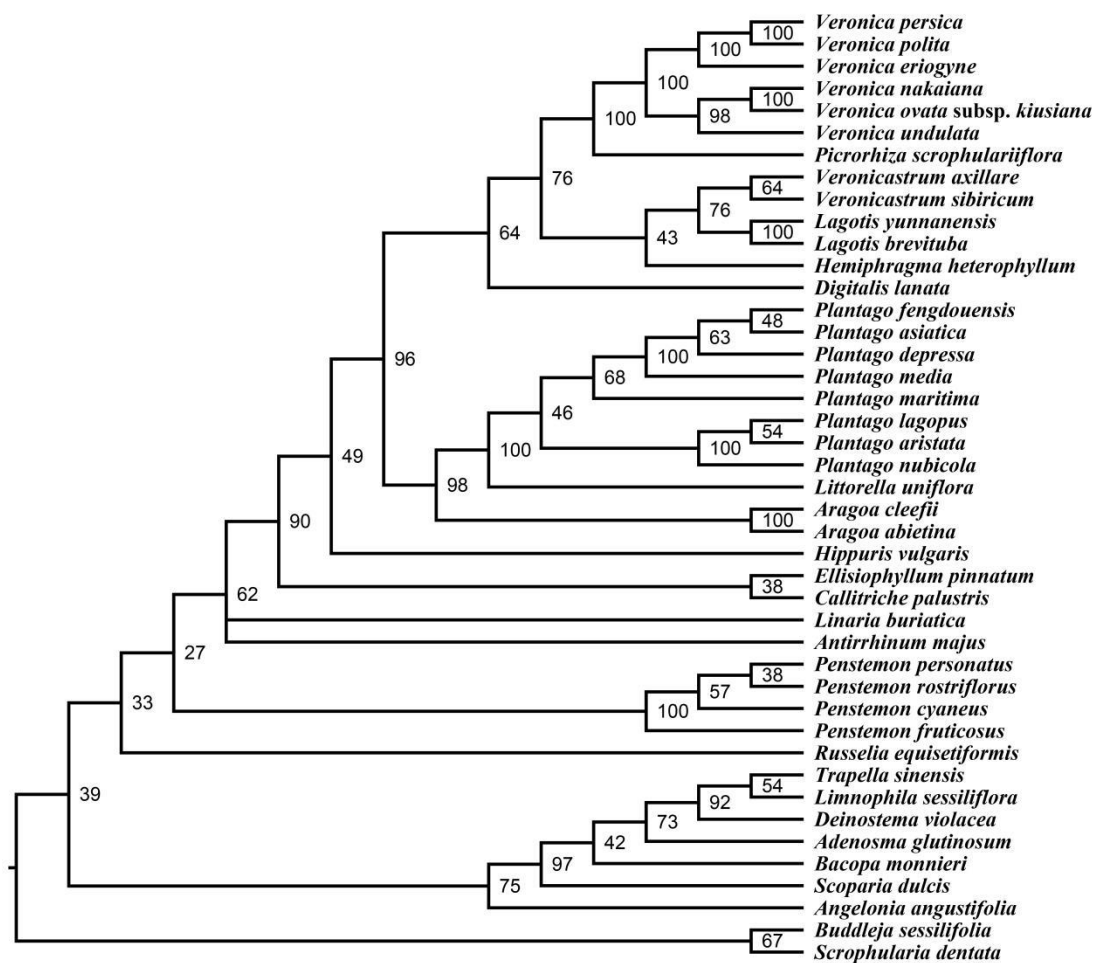

Maximum likelihood tree of Plantaginaceae based on *rps3* gene. Values at nodes represent the bootstrap support values. Nodes <10% bootstrap support were collapsed

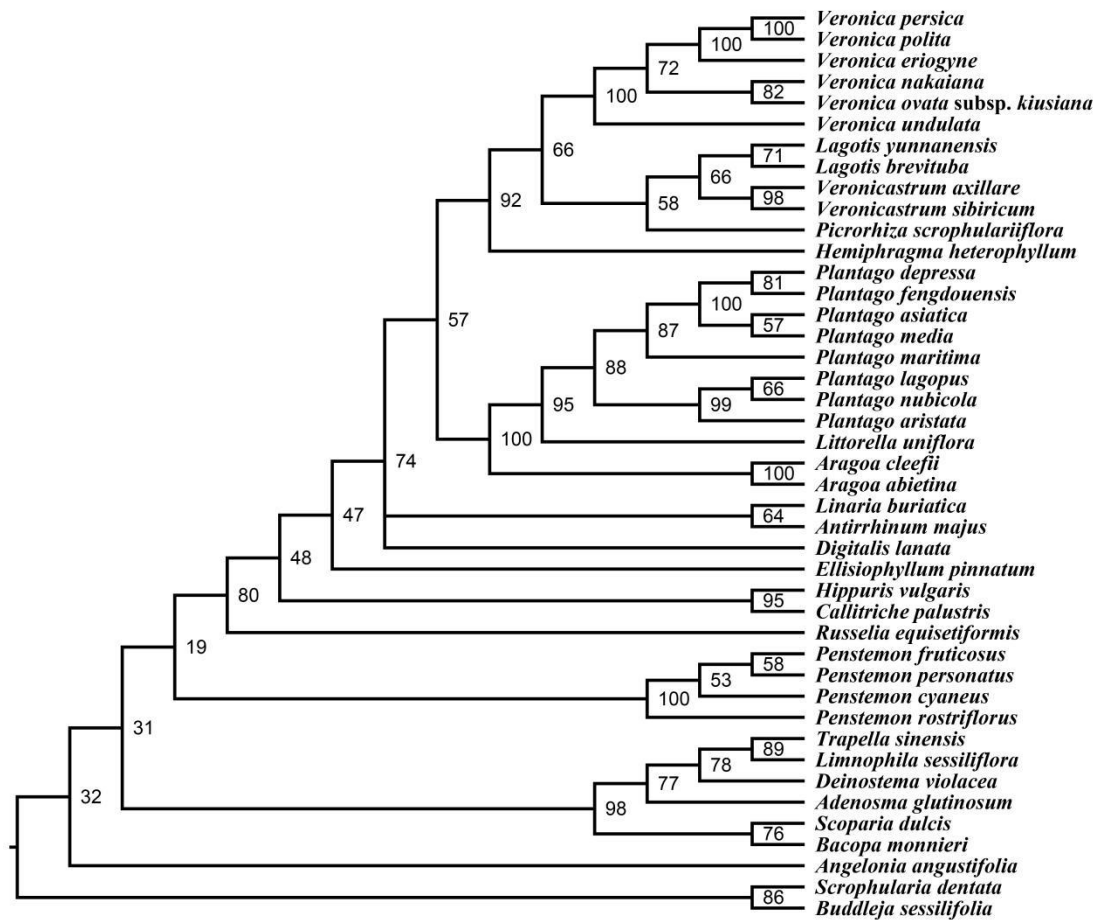

Maximum likelihood tree of Plantaginaceae based on *rps4* gene. Values at nodes represent the bootstrap support values. Nodes <10% bootstrap support were collapsed

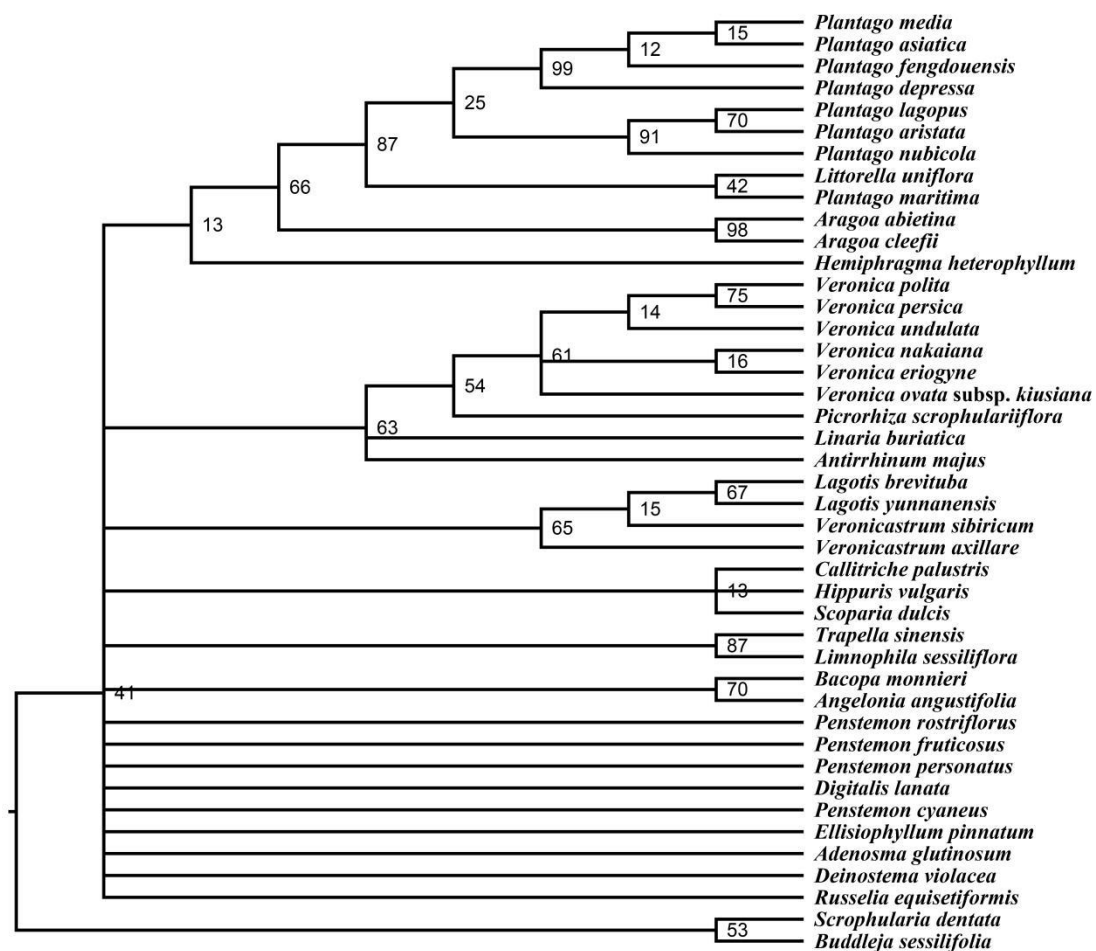

Maximum likelihood tree of Plantaginaceae based on **rps7** gene. Values at nodes represent the bootstrap support values. Nodes <10% bootstrap support were collapsed

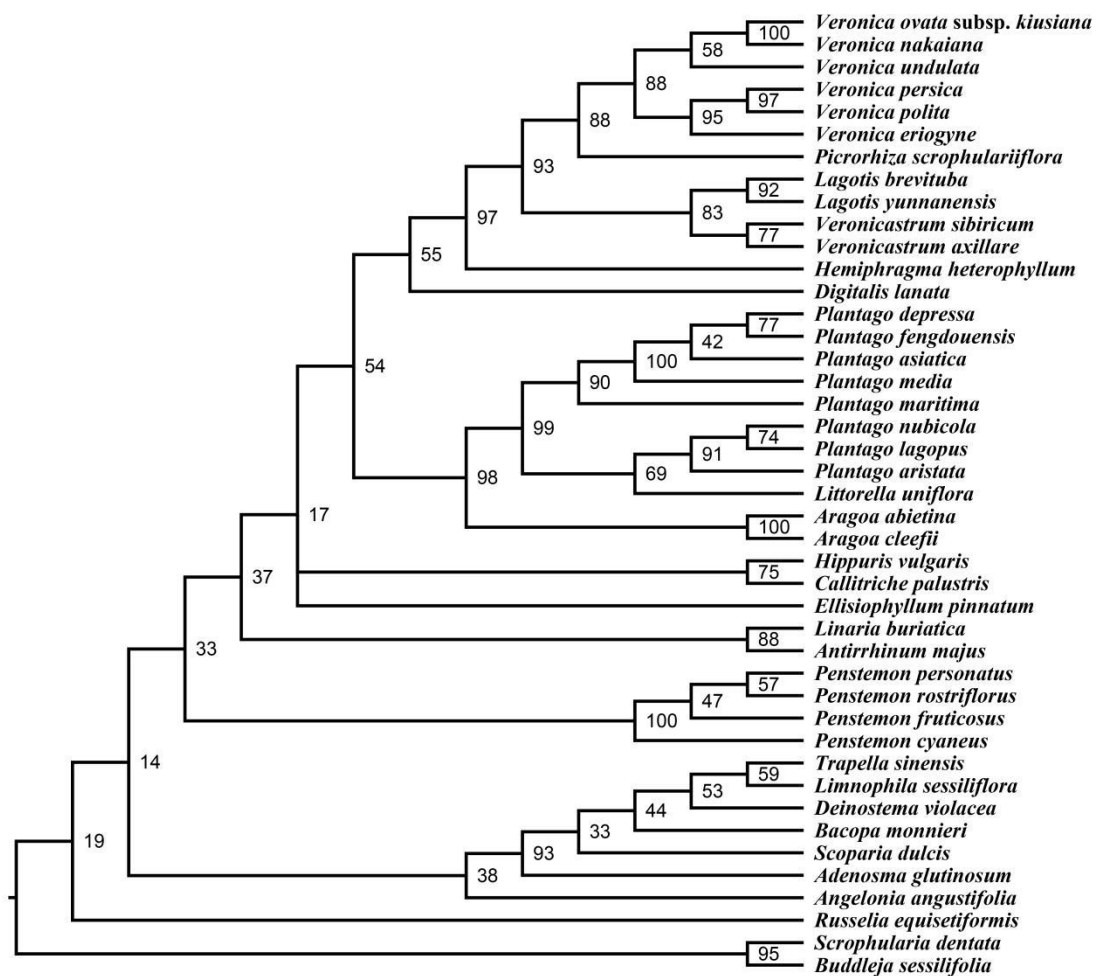

Maximum likelihood tree of Plantaginaceae based on *rps8* gene. Values at nodes represent the bootstrap support values. Nodes <10% bootstrap support were collapsed

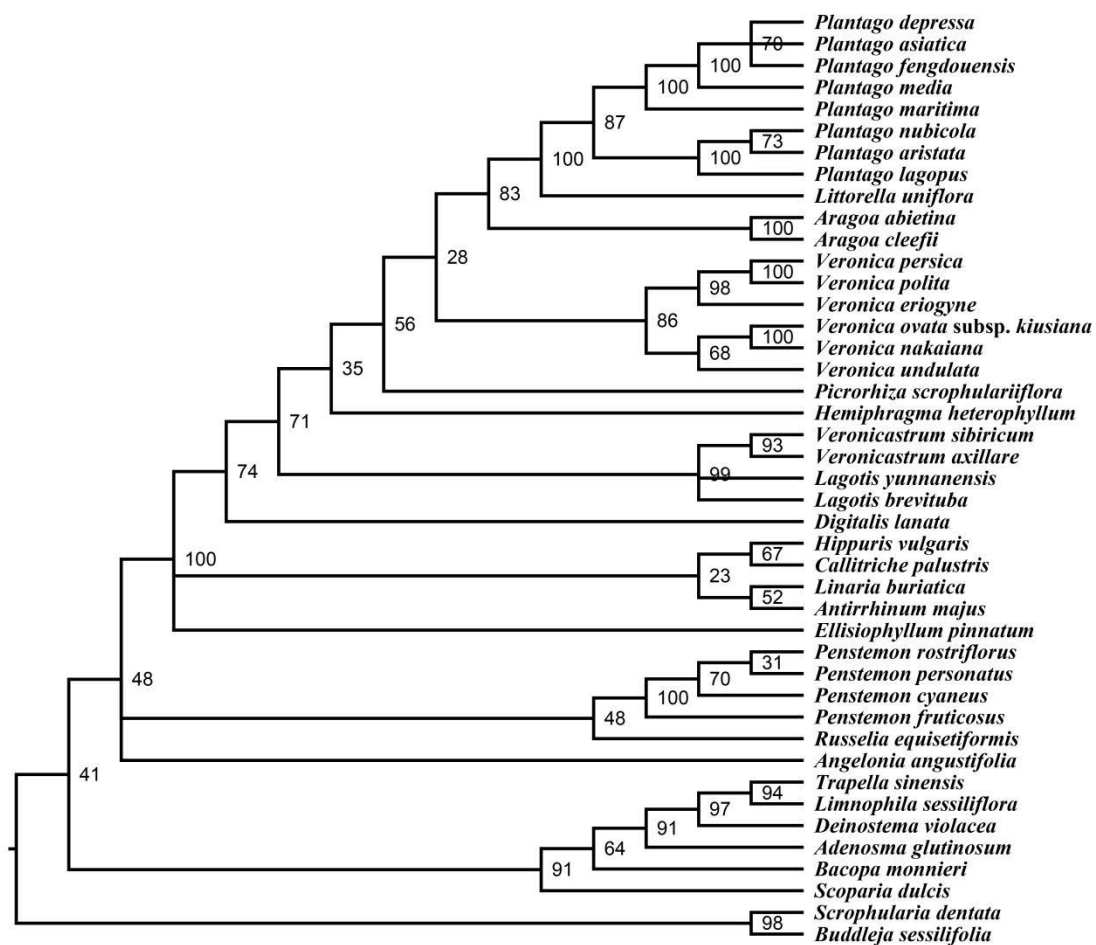

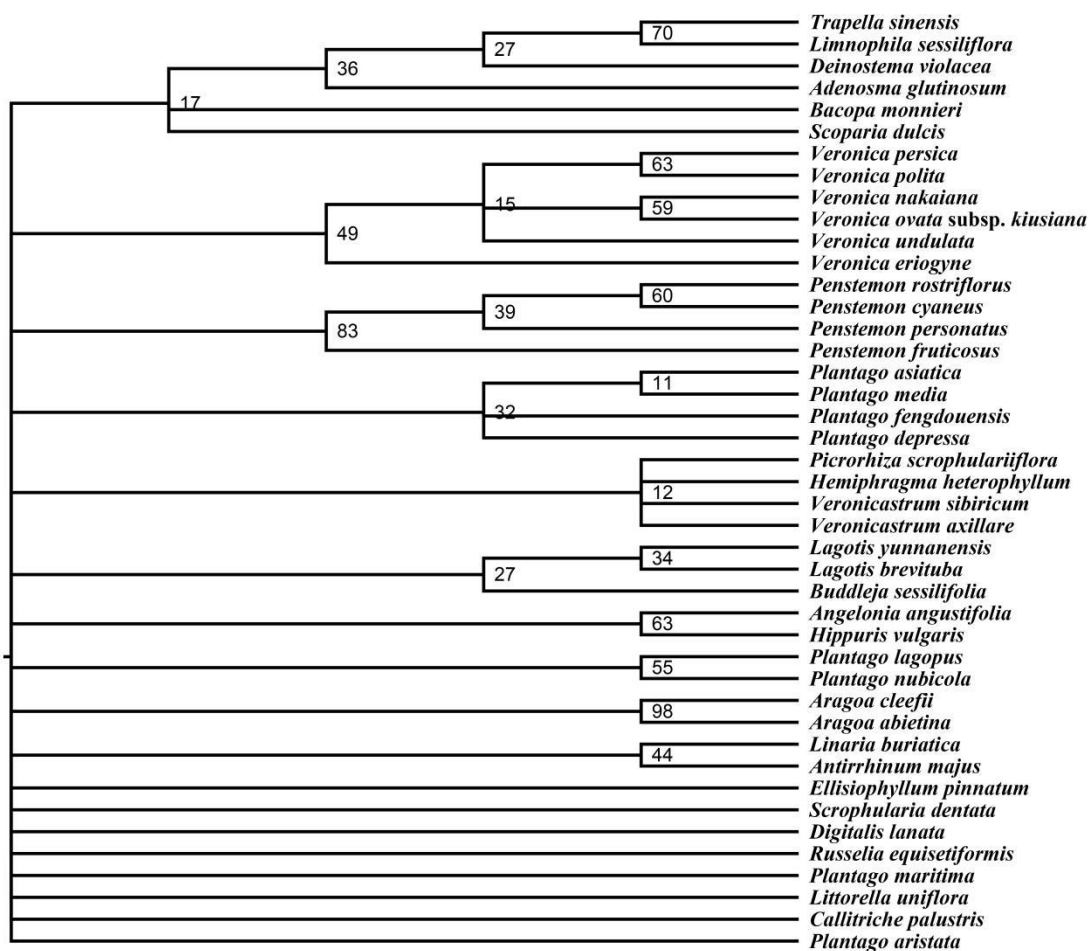

Maximum likelihood tree of Plantaginaceae based on **rps12** gene. Values at nodes represent the bootstrap support values. Nodes <10% bootstrap support were collapsed

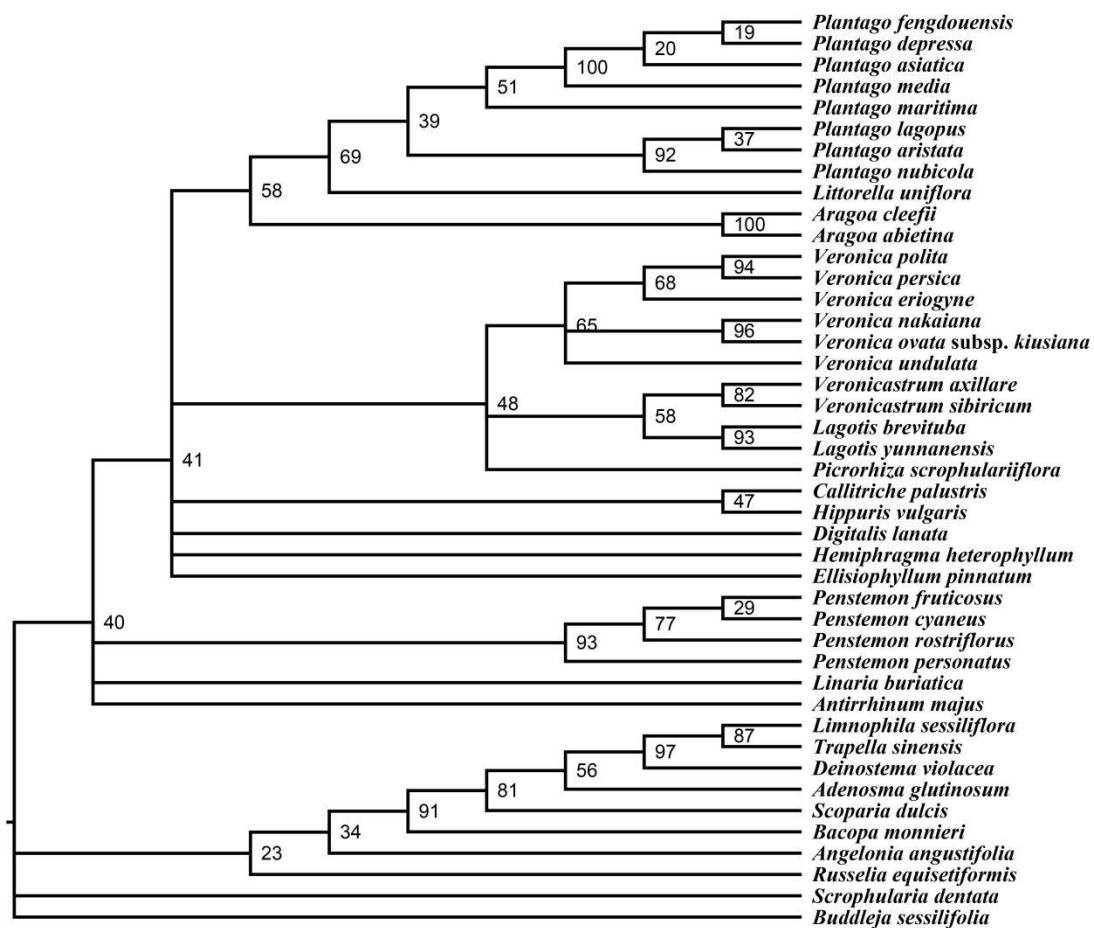

Maximum likelihood tree of Plantaginaceae based on **rps14** gene. Values at nodes represent the bootstrap support values. Nodes <10% bootstrap support were collapsed



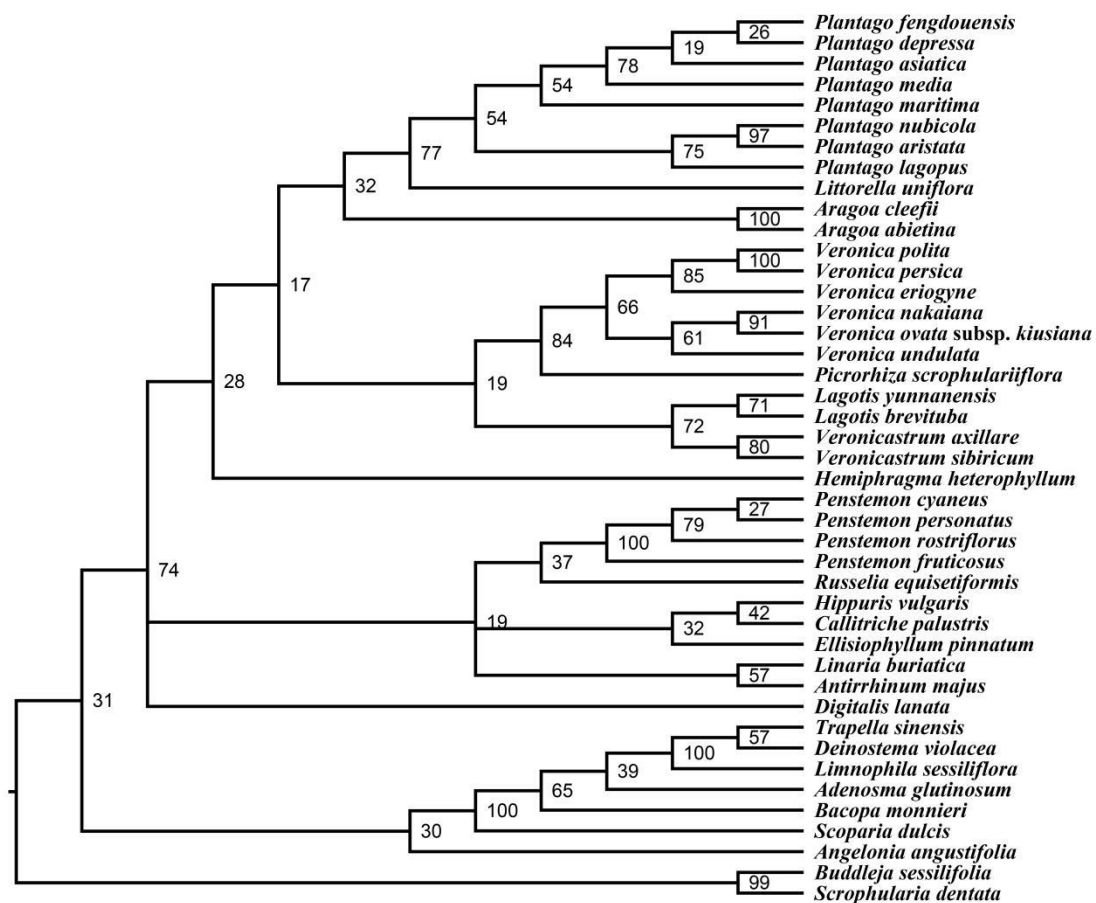

Maximum likelihood tree of Plantaginaceae based on **rps15** gene. Values at nodes represent the bootstrap support values. Nodes <10% bootstrap support were collapsed

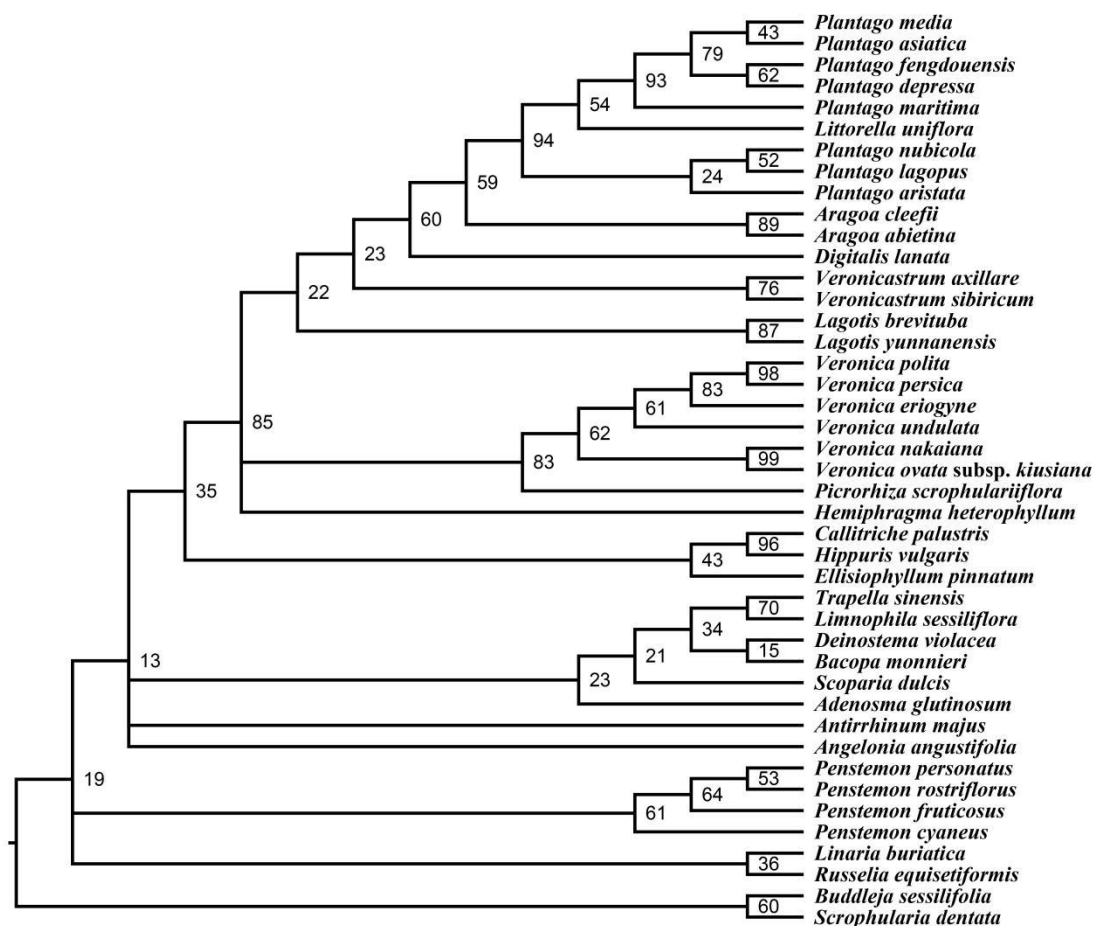

Maximum likelihood tree of Plantaginaceae based on *rps16* gene. Values at nodes represent the bootstrap support values. Nodes <10% bootstrap support were collapsed

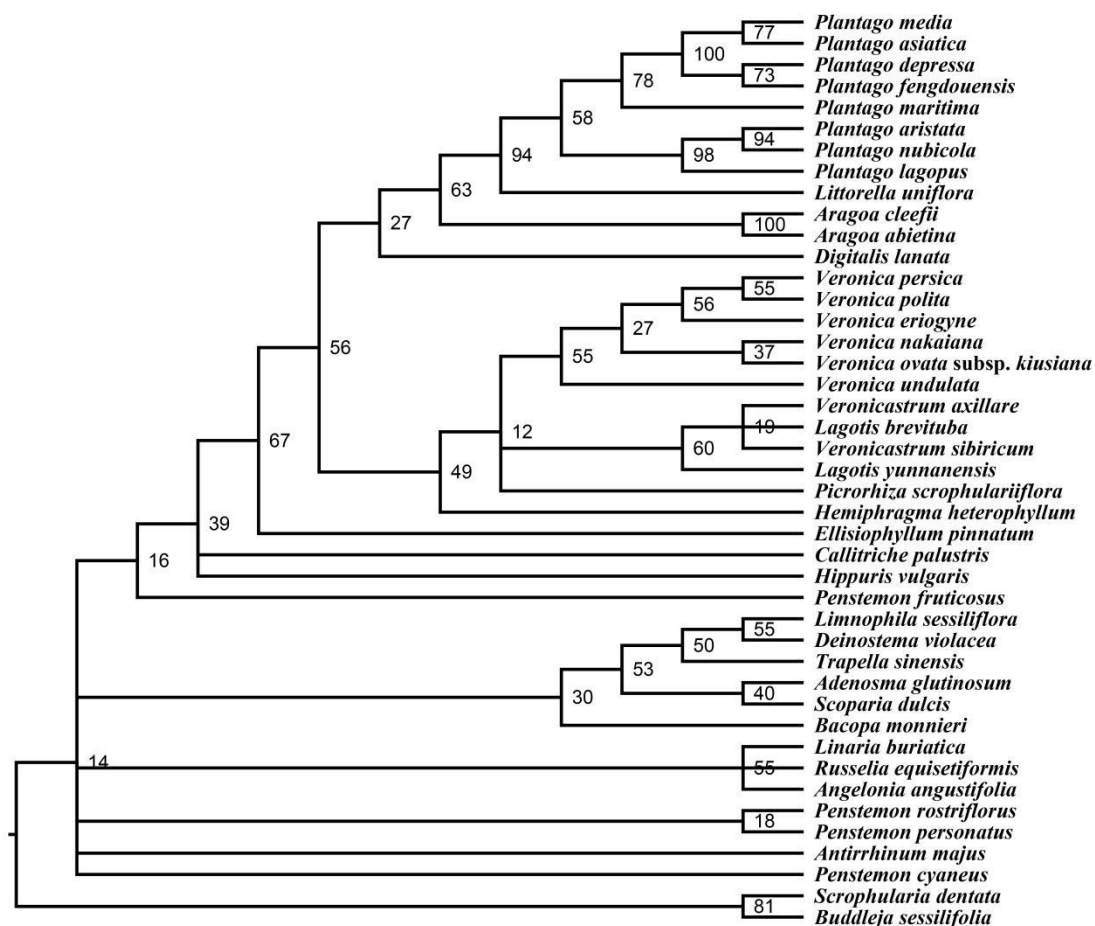

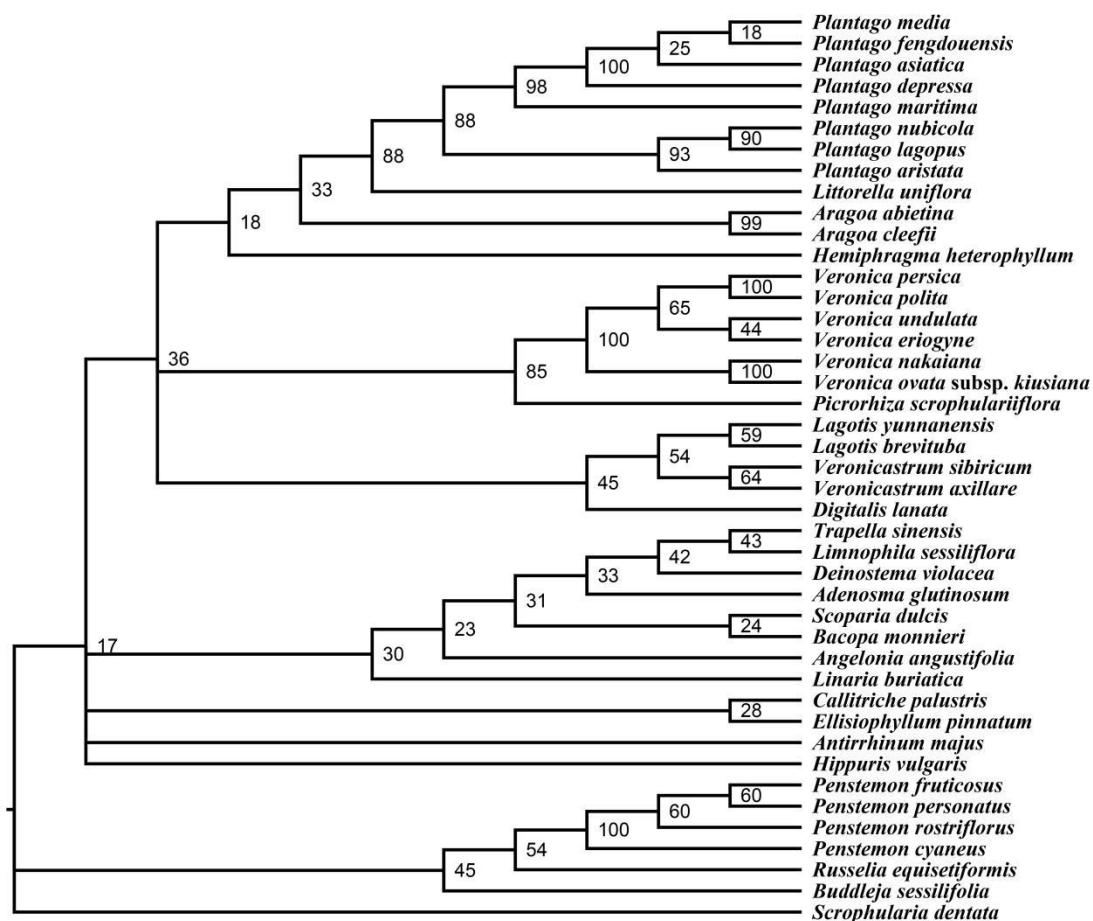

Maximum likelihood tree of Plantaginaceae based on *rps19* gene. Values at nodes represent the bootstrap support values. Nodes <10% bootstrap support were collapsed

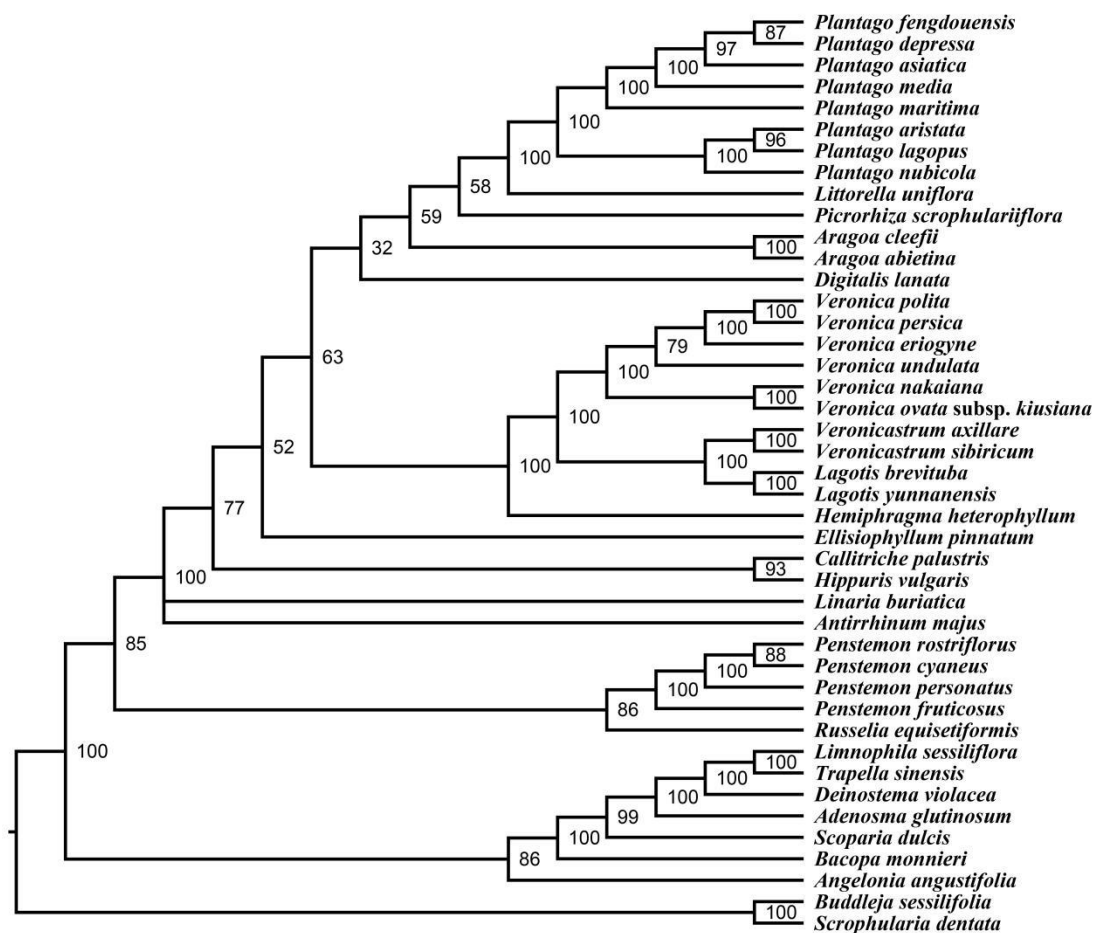

Maximum likelihood tree of Plantaginaceae based on *ycf1* gene. Values at nodes represent the bootstrap support values. Nodes <10% bootstrap support were collapsed

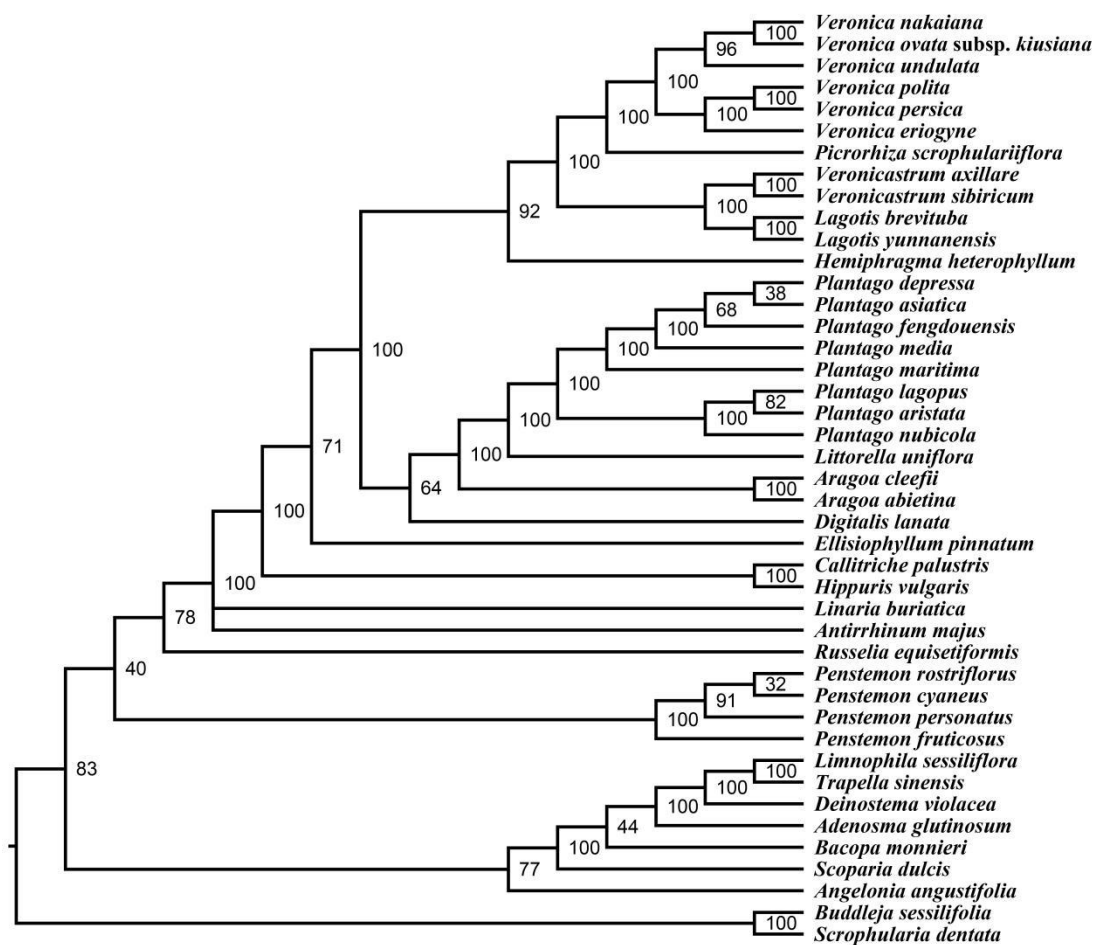

Maximum likelihood tree of Plantaginaceae based on *ycf2* gene. Values at nodes represent the bootstrap support values. Nodes <10% bootstrap support were collapsed

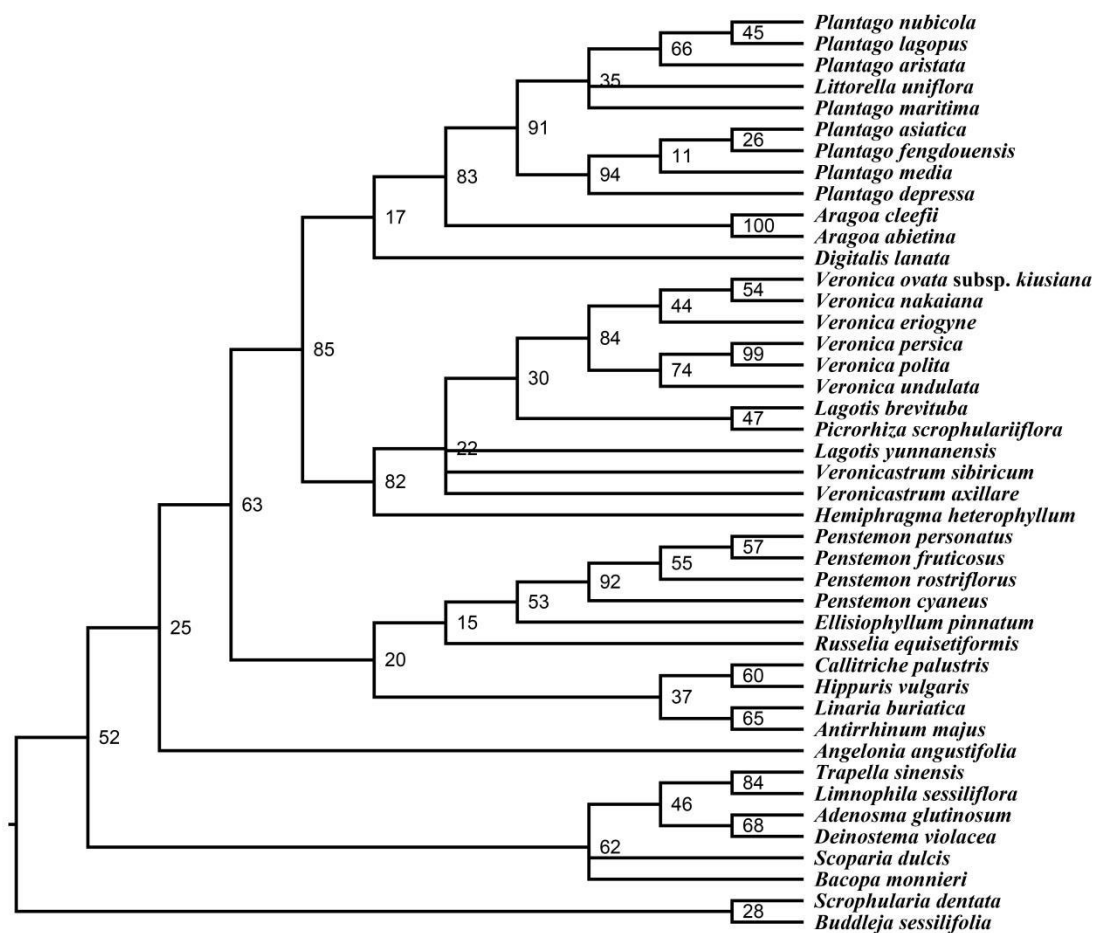

Maximum likelihood tree of Plantaginaceae based on *ycf3* gene. Values at nodes represent the bootstrap support values. Nodes <10% bootstrap support were collapsed

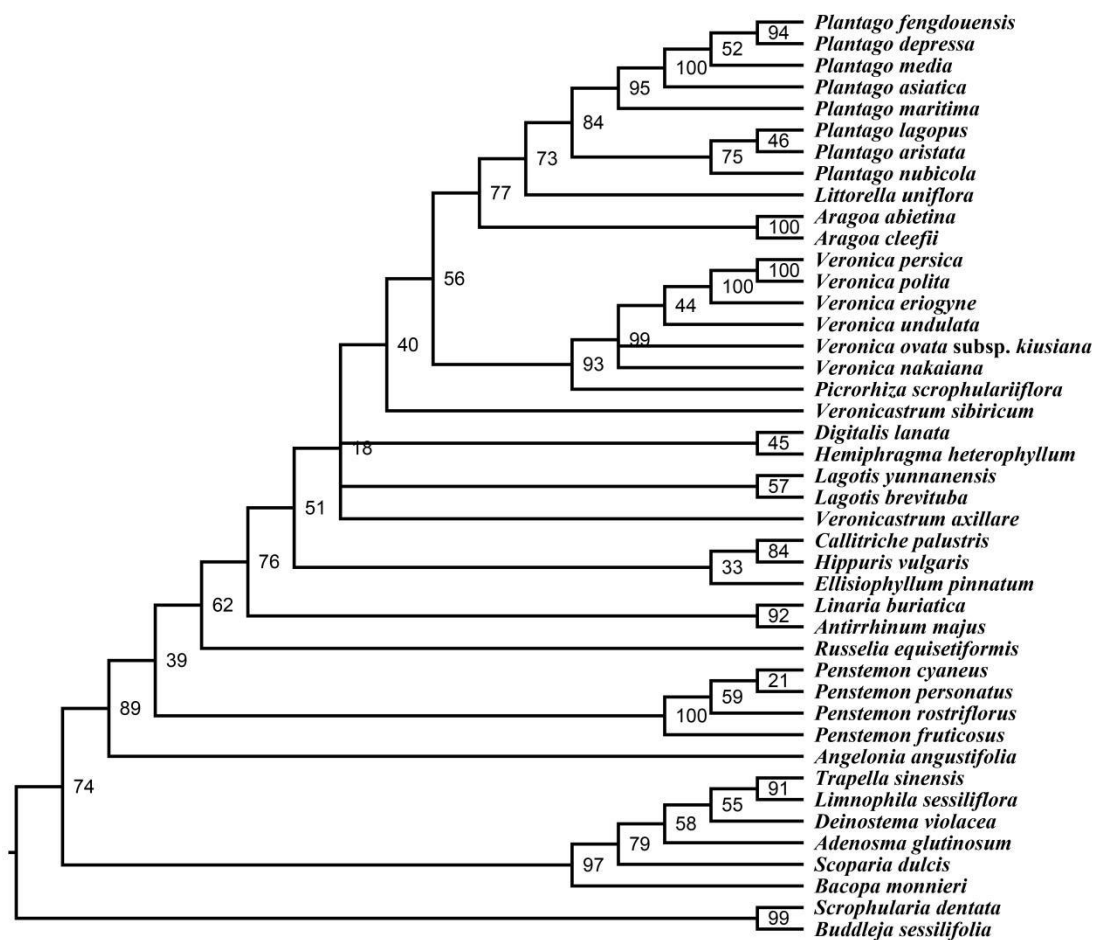

Maximum likelihood tree of Plantaginaceae based on *ycf4* gene. Values at nodes represent the bootstrap support values. Nodes <10% bootstrap support were collapsed
