# Supplementary material for: Plastid Phylogenomic Insights into the Inter-Tribal Relationships of Plantaginaceae
Source: Biology (Basel). 2023 Feb 7;12(2):263. doi: 10.3390/biology12020263 (PMC9953724; doi:10.3390/biology12020263)
Supplement: Supplementary file 1 [file biology-12-00263-s001.zip]

Archive with 9 entries (9 files):
- Figure S1.pdf
- Figure S2.pdf
- Table S1 List of six species newly sequenced with voucher and GenBank accession numbers.pdf
- Table S2 List of Plastomes in phylogenetic analyses from GenBank.pdf
- Table S3 Characteristics of alignments of 68 protein-coding genes involved in the phylogenetic analyses.pdf
- Table S4 Dataset partition with best-fitting model of molecular evolution (Modelfinder) for ML analyses.pdf
- Table S5 Dataset partition with best-fitting model of molecular evolution (Partition Finder) for BI analyses .pdf
- Table S6 Summary of Illumina sequencing for six species.pdf
- Table S7 List of genes identified of plastomes in Plantaginaceae.pdf
